# Supplementary material
Source: HighWire-hosted journal article supplement (http://thorax.bmjjournals.com/highwire/filestream/174130/field_highwire_adjunct_files/6/JB_Supplementary_Table_3.pdf)
Supplement: JB_Supplementary_Table_3.pdf [file JB_Supplementary_Table_3.pdf]

**Supplementary Table 3.** List of genes with an HTE-selective CORE overlapping their promoter (within 2kb upstream of the transcription start site).

| CORE Chrom | CORE Start | CORE Stop | Gene Name  | Gene RefSeq | Gene Chrom | Gene Strand | Promoter Start | Promoter Stop | Overlap(bp) | Expression Value |
|------------|------------|-----------|------------|-------------|------------|-------------|----------------|---------------|-------------|------------------|
| chr12      | 52907538   | 52974591  | KRT5       | NM_000424   | chr12      | -           | 52914244       | 52916244      | 2001        | 15.76723         |
| chr12      | 52820870   | 52887480  | KRT6A      | NM_005554   | chr12      | -           | 52887182       | 52889182      | 299         | 15.748045        |
| chr19      | 17959789   | 17983888  | RPL18A     | NM_000980   | chr19      | +           | 17968729       | 17970729      | 2001        | 15.74742         |
| chr17      | 39743108   | 39820235  | KRT17      | NM_000422   | chr17      | -           | 39780883       | 39782883      | 2001        | 15.61449         |
| chr12      | 6297232    | 6338827   | CD9        | NM_001769   | chr12      | +           | 6307553        | 6309553       | 2001        | 15.59768         |
| chr8       | 146015609  | 146031861 | RPL8       | NM_033301   | chr8       | -           | 146017730      | 146019730     | 2001        | 15.4463          |
| chrX       | 118589289  | 118635962 | SLC25A5    | NM_001152   | chrX       | +           | 118600361      | 118602361     | 2001        | 15.43477         |
| chr9       | 136179690  | 136232109 | RPL7A      | NM_000972   | chr9       | +           | 136213067      | 136215067     | 2001        | 15.426485        |
| chr17      | 39743108   | 39820235  | KRT16      | NM_005557   | chr17      | -           | 39769080       | 39771080      | 2001        | 15.386095        |
| chr12      | 52820870   | 52887480  | KRT6C      | NM_173086   | chr12      | -           | 52867570       | 52869570      | 2001        | 15.37582         |
| chr17      | 39743108   | 39820235  | KRT14      | NM_000526   | chr17      | -           | 39743148       | 39745148      | 2001        | 15.33091         |
| chr18      | 21263752   | 21290396  | LAMA3      | NM_198129   | chr18      | +           | 21267560       | 21269560      | 2001        | 15.293675        |
| chr8       | 82184423   | 82197862  | FABP5      | NM_001444   | chr8       | +           | 82190783       | 82192783      | 2001        | 15.275335        |
| chr16      | 2560914    | 2578176   | ATP6V0C    | NM_001694   | chr16      | +           | 2561951        | 2563951       | 2001        | 15.23641         |
| chr16      | 56709889   | 56718813  | MT1X       | NM_005952   | chr16      | +           | 56714380       | 56716380      | 2001        | 15.192305        |
| chr17      | 74561487   | 74583300  | ST6GALNAC2 | NM_006456   | chr17      | -           | 74582146       | 74584146      | 1155        | 15.04813         |
| chr22      | 36769390   | 36792473  | MYH9       | NM_002473   | chr22      | -           | 36784064       | 36786064      | 2001        | 15.03295         |
| chr19      | 54937804   | 54971008  | LENG8      | NM_052925   | chr19      | +           | 54958063       | 54960063      | 2001        | 15.00143         |
| chr4       | 187620452  | 187648566 | FAT1       | NM_005245   | chr4       | -           | 187644988      | 187646988     | 2001        | 14.990905        |
| chr7       | 128468762  | 128561570 | ATP6V1F    | NM_004231   | chr7       | +           | 128500896      | 128502896     | 2001        | 14.97625         |
| chr5       | 135363078  | 135370653 | TGFBI      | NM_000358   | chr5       | +           | 135362582      | 135364582     | 1505        | 14.97352         |

|       |           |           |          |           |       |   |           |           |      |           |
|-------|-----------|-----------|----------|-----------|-------|---|-----------|-----------|------|-----------|
| chr2  | 219132248 | 219163140 | TMBIM1   | NM_022152 | chr2  | - | 219157281 | 219159281 | 2001 | 14.96145  |
| chr1  | 95008733  | 95019204  | F3       | NM_001993 | chr1  | - | 95007414  | 95009414  | 682  | 14.94626  |
| chr1  | 86882170  | 86896383  | CLCA2    | NM_006536 | chr1  | + | 86887767  | 86889767  | 2001 | 14.896205 |
| chr15 | 101417568 | 101446363 | ALDH1A3  | NM_000693 | chr15 | + | 101418007 | 101420007 | 2001 | 14.87284  |
| chr3  | 52003452  | 52021750  | ABHD14B  | NM_032750 | chr3  | - | 52008647  | 52010647  | 2001 | 14.769545 |
| chr1  | 86020483  | 86048926  | CYR61    | NM_001554 | chr1  | + | 86044442  | 86046442  | 2001 | 14.73906  |
| chr5  | 175385631 | 175413026 | THOC3    | NM_032361 | chr5  | - | 175395546 | 175397546 | 2001 | 14.73083  |
| chr1  | 152890432 | 152976512 | SPRR1A   | NM_005987 | chr1  | + | 152954555 | 152956555 | 2001 | 14.586635 |
| chr6  | 7532572   | 7560215   | DSP      | NM_004415 | chr6  | + | 7539868   | 7541868   | 2001 | 14.495115 |
| chr11 | 2396519   | 2482161   | CD81     | NM_004356 | chr11 | + | 2396545   | 2398545   | 2001 | 14.46802  |
| chr4  | 75463923  | 75485725  | AREG     | NM_001657 | chr4  | + | 75478627  | 75480627  | 2001 | 14.42852  |
| chr4  | 83806760  | 83820089  | SEC31A   | NM_016211 | chr4  | - | 83812413  | 83814413  | 2001 | 14.42491  |
| chr17 | 39680188  | 39697532  | KRT19    | NM_002276 | chr17 | - | 39684642  | 39686642  | 2001 | 14.39085  |
| chr22 | 19163979  | 19187060  | SLC25A1  | NM_005984 | chr22 | - | 19166302  | 19168302  | 2001 | 14.37009  |
| chrX  | 153655472 | 153675381 | GDI1     | NM_001493 | chrX  | + | 153663257 | 153665257 | 2001 | 14.369065 |
| chr11 | 64070818  | 64089422  | TRMT112  | NM_016404 | chr11 | - | 64085034  | 64087034  | 2001 | 14.366525 |
| chr18 | 61306314  | 61329312  | SERPINB3 | NM_006919 | chr18 | - | 61329198  | 61331198  | 115  | 14.35049  |
| chr11 | 61093540  | 61117118  | DDB1     | NM_001923 | chr11 | - | 61100667  | 61102667  | 2001 | 14.338065 |
| chr1  | 31862911  | 31908214  | SERINC2  | NM_178865 | chr1  | + | 31883961  | 31885961  | 2001 | 14.33186  |
| chr19 | 42238436  | 42306526  | CEACAM6  | NM_002483 | chr19 | + | 42257396  | 42259396  | 2001 | 14.291405 |
| chr22 | 20076835  | 20131975  | RANBP1   | NM_002882 | chr22 | + | 20103022  | 20105022  | 2001 | 14.27383  |
| chr12 | 52820870  | 52887480  | KRT6B    | NM_005555 | chr12 | - | 52845911  | 52847911  | 2001 | 14.240575 |
| chr16 | 2306105   | 2327686   | RNPS1    | NM_080594 | chr16 | - | 2318115   | 2320115   | 2001 | 14.196765 |
| chrX  | 153655472 | 153675381 | ATP6AP1  | NM_001183 | chrX  | + | 153654976 | 153656976 | 1505 | 14.19439  |

|       |           |           |          |              |       |   |           |           |      |            |
|-------|-----------|-----------|----------|--------------|-------|---|-----------|-----------|------|------------|
| chr2  | 95939604  | 95974537  | PROM2    | NM_144707    | chr2  | + | 95938199  | 95940199  | 596  | 14.170585  |
| chr11 | 102324592 | 102327412 | TMEM123  | NM_052932    | chr11 | - | 102323776 | 102325776 | 1185 | 14.16833   |
| chr1  | 153315567 | 153359389 | S100A9   | NM_002965    | chr1  | + | 153328328 | 153330328 | 2001 | 14.167335  |
| chr1  | 201956097 | 201984314 | ELF3     | NM_004433    | chr1  | + | 201977688 | 201979688 | 2001 | 14.164525  |
| chr1  | 159883546 | 159929591 | TAGLN2   | NM_003564    | chr1  | - | 159895285 | 159897285 | 2001 | 14.15357   |
| chr1  | 36891604  | 36942685  | MRPS15   | NM_031280    | chr1  | - | 36930041  | 36932041  | 2001 | 14.14857   |
| chr7  | 99058290  | 99082974  | ATP5J2   | NM_004889    | chr7  | - | 99063809  | 99065809  | 2001 | 14.10345   |
| chr13 | 78090508  | 78128367  | SCEL     | NM_144777    | chr13 | + | 78107807  | 78109807  | 2001 | 14.0761    |
| chr1  | 11973491  | 12003749  | PLOD1    | NM_000302    | chr1  | + | 11992744  | 11994744  | 2001 | 14.01929   |
| chr1  | 153924325 | 153940770 | SLC39A1  | NM_014437    | chr1  | - | 153940189 | 153942189 | 582  | 14.00591   |
| chrX  | 152068908 | 152114784 | ZNF185   | NM_007150    | chrX  | + | 152080984 | 152082984 | 2001 | 13.99977   |
| chr2  | 234651310 | 234670477 | UGT1A1   | NM_000463    | chr2  | + | 234666917 | 234668917 | 2001 | 13.983455  |
| chr21 | 44843387  | 44872288  | SIK1     | NM_173354    | chr21 | - | 44847003  | 44849003  | 2001 | 13.96396   |
| chr17 | 76973826  | 77000147  | LGALS3BP | NM_005567    | chr17 | - | 76976062  | 76978062  | 2001 | 13.905685  |
| chr19 | 5666968   | 5715071   | RPL36    | NM_033643    | chr19 | + | 5688270   | 5690270   | 2001 | 13.9024975 |
| chr19 | 2080611   | 2101935   | MOBKL2A  | NM_130807    | chr19 | - | 2096270   | 2098270   | 2001 | 13.882415  |
| chr6  | 33654522  | 33702457  | C6orf125 | NM_032340    | chr6  | - | 33679505  | 33681505  | 2001 | 13.824095  |
| chr19 | 6733015   | 6750491   | TRIP10   | NM_004240    | chr19 | + | 6737705   | 6739705   | 2001 | 13.82371   |
| chr10 | 5522208   | 5572766   | CALML3   | NM_005185    | chr10 | + | 5564922   | 5566922   | 2001 | 13.81053   |
| chr12 | 57966563  | 58022490  | PIP4K2C  | NM_024779    | chr12 | + | 57982940  | 57984940  | 2001 | 13.782845  |
| chrX  | 47069468  | 47081477  | CDK16    | NM_033018    | chrX  | + | 47075526  | 47077526  | 2001 | 13.778395  |
| chr12 | 2880551   | 2909700   | FKBP4    | NM_002014    | chr12 | + | 2902106   | 2904106   | 2001 | 13.762515  |
| chr3  | 190036497 | 190044028 | CLDN1    | NM_021101    | chr3  | - | 190040236 | 190042236 | 2001 | 13.74576   |
| chr17 | 7251199   | 7265679   | KCTD11   | NM_001002914 | chr17 | + | 7253206   | 7255206   | 2001 | 13.73162   |

|       |           |           |         |           |       |   |           |           |      |            |
|-------|-----------|-----------|---------|-----------|-------|---|-----------|-----------|------|------------|
| chr19 | 1257485   | 1279145   | CIRBP   | NM_001280 | chr19 | + | 1267265   | 1269265   | 2001 | 13.71607   |
| chr19 | 46008540  | 46025703  | VASP    | NM_003370 | chr19 | + | 46008686  | 46010686  | 2001 | 13.7095275 |
| chr4  | 83295961  | 83316539  | HNRNPD  | NM_031370 | chr4  | - | 83295150  | 83297150  | 1190 | 13.6839575 |
| chr17 | 3561568   | 3600311   | TAX1BP3 | NM_014604 | chr17 | - | 3571974   | 3573974   | 2001 | 13.65731   |
| chr15 | 66652140  | 66693965  | MAP2K1  | NM_002755 | chr15 | + | 66677209  | 66679209  | 2001 | 13.64964   |
| chr14 | 100836534 | 100864172 | WARS    | NM_213646 | chr14 | - | 100841928 | 100843928 | 2001 | 13.588505  |
| chr19 | 6733015   | 6750491   | GPR108  | NM_020171 | chr19 | - | 6737305   | 6739305   | 2001 | 13.54836   |
| chr4  | 87507237  | 87517191  | PTPN13  | NM_080685 | chr4  | + | 87513466  | 87515466  | 2001 | 13.542245  |
| chr19 | 13098598  | 13128062  | NFIX    | NM_002501 | chr19 | + | 13104582  | 13106582  | 2001 | 13.541425  |
| chr1  | 3518344   | 3571185   | TPRG1L  | NM_182752 | chr1  | + | 3539554   | 3541554   | 2001 | 13.53598   |
| chr10 | 104384642 | 104416923 | TRIM8   | NM_030912 | chr10 | + | 104402250 | 104404250 | 2001 | 13.5339    |
| chr6  | 116686952 | 116697622 | DSE     | NM_013352 | chr6  | + | 116690108 | 116692108 | 2001 | 13.527205  |
| chr16 | 66866681  | 66881347  | NAE1    | NM_003905 | chr16 | - | 66864880  | 66866880  | 200  | 13.466805  |
| chr9  | 132928800 | 132974058 | NCS1    | NM_014286 | chr9  | + | 132932855 | 132934855 | 2001 | 13.4584    |
| chr1  | 32028468  | 32057799  | TINAGL1 | NM_022164 | chr1  | + | 32040084  | 32042084  | 2001 | 13.45525   |
| chr9  | 112257365 | 112300855 | PTPN3   | NM_002829 | chr9  | - | 112260594 | 112262594 | 2001 | 13.45286   |
| chr9  | 131636749 | 131653228 | LRRC8A  | NM_019594 | chr9  | + | 131642389 | 131644389 | 2001 | 13.44815   |
| chr16 | 28850366  | 28885949  | TUFM    | NM_003321 | chr16 | - | 28857730  | 28859730  | 2001 | 13.41595   |
| chr19 | 51476183  | 51644831  | KLK10   | NM_145888 | chr19 | - | 51522955  | 51524955  | 2001 | 13.412875  |
| chr18 | 9616035   | 9648737   | PPP4R1  | NM_005134 | chr18 | - | 9614601   | 9616601   | 567  | 13.39344   |
| chr5  | 180196937 | 180239180 | MGAT1   | NM_002406 | chr5  | - | 180230049 | 180232049 | 2001 | 13.373685  |
| chr14 | 60628033  | 60646543  | DHRS7   | NM_016029 | chr14 | - | 60632212  | 60634212  | 2001 | 13.327185  |
| chr15 | 90733914  | 90747445  | SEMA4B  | NM_198925 | chr15 | + | 90742560  | 90744560  | 2001 | 13.325465  |
| chrX  | 13706702  | 13739822  | RAB9A   | NM_004251 | chrX  | + | 13705238  | 13707238  | 537  | 13.31957   |

|       |           |           |           |           |       |   |           |           |      |           |
|-------|-----------|-----------|-----------|-----------|-------|---|-----------|-----------|------|-----------|
| chr6  | 159067484 | 159107731 | DYNLT1    | NM_006519 | chr6  | - | 159065805 | 159067805 | 322  | 13.3114   |
| chr6  | 128812533 | 128854266 | PTPRK     | NM_002844 | chr6  | - | 128841820 | 128843820 | 2001 | 13.303555 |
| chr2  | 110351878 | 110373216 | SEPT10    | NM_178584 | chr2  | - | 110371784 | 110373784 | 1433 | 13.29222  |
| chr10 | 72544248  | 72590304  | SGPL1     | NM_003901 | chr10 | + | 72573702  | 72575702  | 2001 | 13.26699  |
| chrX  | 68043694  | 68067101  | EFNB1     | NM_004429 | chrX  | + | 68046838  | 68048838  | 2001 | 13.258645 |
| chr1  | 24611808  | 24650075  | GRHL3     | NM_198174 | chr1  | + | 24643810  | 24645810  | 2001 | 13.220595 |
| chr7  | 128071310 | 128097763 | C7orf68   | NM_013332 | chr7  | + | 128093882 | 128095882 | 2001 | 13.214875 |
| chr10 | 105540305 | 105616840 | SH3PXD2A  | NM_014631 | chr10 | - | 105615165 | 105617165 | 1676 | 13.199605 |
| chr19 | 48253581  | 48293428  | SEPW1     | NM_003009 | chr19 | + | 48279840  | 48281840  | 2001 | 13.19732  |
| chr10 | 105676827 | 105702013 | OBFC1     | NM_024928 | chr10 | - | 105678046 | 105680046 | 2001 | 13.166235 |
| chr16 | 2815749   | 2832105   | TCEB2     | NM_207013 | chr16 | - | 2827298   | 2829298   | 2001 | 13.161085 |
| chr19 | 35589015  | 35619312  | FXVD3     | NM_021910 | chr19 | + | 35604730  | 35606730  | 2001 | 13.14941  |
| chr17 | 2609763   | 2633727   | KIAA0664  | NM_015229 | chr17 | - | 2614928   | 2616928   | 2001 | 13.13668  |
| chr4  | 69282400  | 69317954  | TMPRSS11E | NM_014058 | chr4  | + | 69311165  | 69313165  | 2001 | 13.11672  |
| chr18 | 28619599  | 28658066  | DSC3      | NM_024423 | chr18 | - | 28622782  | 28624782  | 2001 | 13.09876  |
| chr2  | 98609389  | 98614557  | TMEM131   | NM_015348 | chr2  | - | 98612355  | 98614355  | 2001 | 13.09246  |
| chr2  | 242066347 | 242090779 | PPP1R7    | NM_002712 | chr2  | + | 242087900 | 242089900 | 2001 | 13.076735 |
| chr13 | 113943227 | 113977204 | LAMP1     | NM_005561 | chr13 | + | 113949467 | 113951467 | 2001 | 13.05788  |
| chr16 | 55586568  | 55602411  | CAPNS2    | NM_032330 | chr16 | + | 55598582  | 55600582  | 2001 | 13.03131  |
| chr7  | 44156290  | 44202820  | POLD2     | NM_006230 | chr7  | - | 44163148  | 44165148  | 2001 | 13.00529  |
| chr16 | 88906597  | 88943319  | TRAPPC2L  | NM_016209 | chr16 | + | 88921504  | 88923504  | 2001 | 12.989225 |
| chr10 | 126683510 | 126718472 | CTBP2     | NM_022802 | chr10 | - | 126716454 | 126718454 | 2001 | 12.97243  |
| chr10 | 106081783 | 106095462 | ITPRIP    | NM_033397 | chr10 | - | 106093664 | 106095664 | 1799 | 12.97063  |
| chr19 | 16680793  | 16707602  | SLC35E1   | NM_024881 | chr19 | - | 16683194  | 16685194  | 2001 | 12.942545 |

|       |           |           |           |              |       |   |           |           |      |            |
|-------|-----------|-----------|-----------|--------------|-------|---|-----------|-----------|------|------------|
| chr18 | 61306314  | 61329312  | SERPINB4  | NM_002974    | chr18 | - | 61311503  | 61313503  | 2001 | 12.94      |
| chr22 | 43251824  | 43281343  | ARFGAP3   | NM_014570    | chr22 | - | 43253409  | 43255409  | 2001 | 12.920085  |
| chr6  | 44085111  | 44117431  | MRPL14    | NM_032111    | chr6  | - | 44095192  | 44097192  | 2001 | 12.90656   |
| chr1  | 15727026  | 15752965  | EFHD2     | NM_024329    | chr1  | + | 15734389  | 15736389  | 2001 | 12.90273   |
| chr16 | 87554     | 148084    | POLR3K    | NM_016310    | chr16 | - | 103633    | 105633    | 2001 | 12.902435  |
| chr8  | 28241864  | 28247613  | ZNF395    | NM_018660    | chr8  | - | 28243978  | 28245978  | 2001 | 12.893655  |
| chr13 | 73629003  | 73640378  | KLF5      | NM_001730    | chr13 | + | 73631140  | 73633140  | 2001 | 12.886225  |
| chr21 | 46278233  | 46320017  | PTTG1IP   | NM_004339    | chr21 | - | 46293742  | 46295742  | 2001 | 12.860775  |
| chr17 | 55050943  | 55072135  | SCPEP1    | NM_021626    | chr17 | + | 55053466  | 55055466  | 2001 | 12.850575  |
| chrX  | 152940672 | 152970048 | SLC6A8    | NM_005629    | chrX  | + | 152951750 | 152953750 | 2001 | 12.837425  |
| chr19 | 42653203  | 42753990  | GSK3A     | NM_019884    | chr19 | - | 42746737  | 42748737  | 2001 | 12.836555  |
| chr1  | 201235025 | 201255142 | PKP1      | NM_001005337 | chr1  | + | 201250578 | 201252578 | 2001 | 12.829515  |
| chr17 | 79863562  | 79914497  | MAFG      | NM_032711    | chr17 | - | 79881409  | 79883409  | 2001 | 12.804205  |
| chr17 | 687476    | 704296    | GLOD4     | NM_016080    | chr17 | - | 685572    | 687572    | 97   | 12.79346   |
| chr4  | 68727330  | 68758275  | TMPRSS11D | NM_004262    | chr4  | - | 68749717  | 68751717  | 2001 | 12.787165  |
| chr15 | 63631663  | 63678544  | CA12      | NM_206925    | chr15 | - | 63674076  | 63676076  | 2001 | 12.73543   |
| chr19 | 45309737  | 45344683  | BCAM      | NM_005581    | chr19 | + | 45310336  | 45312336  | 2001 | 12.7242675 |
| chr7  | 821691    | 863550    | SUN1      | NM_025154    | chr7  | + | 854250    | 856250    | 2001 | 12.722665  |
| chr4  | 983594    | 1011181   | FGFRL1    | NM_021923    | chr4  | + | 1004250   | 1006250   | 2001 | 12.71794   |
| chr19 | 42238436  | 42306526  | CEACAM3   | NM_001815    | chr19 | + | 42298532  | 42300532  | 2001 | 12.69175   |
| chr7  | 143062012 | 143086349 | ZYX       | NM_003461    | chr7  | + | 143076358 | 143078358 | 2001 | 12.689375  |
| chr17 | 7114192   | 7122683   | ACADVL    | NM_001033859 | chr17 | + | 7121151   | 7123151   | 1533 | 12.68132   |
| chr5  | 176065672 | 176168691 | TSPAN17   | NM_130465    | chr5  | + | 176072386 | 176074386 | 2001 | 12.678145  |
| chr15 | 74898779  | 74912894  | CLK3      | NM_003992    | chr15 | + | 74898711  | 74900711  | 1933 | 12.6753775 |

|       |           |           |           |              |       |   |           |           |      |           |
|-------|-----------|-----------|-----------|--------------|-------|---|-----------|-----------|------|-----------|
| chr19 | 51476183  | 51644831  | KLK11     | NM_144947    | chr19 | - | 51530886  | 51532886  | 2001 | 12.673705 |
| chr15 | 63330144  | 63339562  | TPM1      | NM_001018020 | chr15 | + | 63332836  | 63334836  | 2001 | 12.651758 |
| chr5  | 134904724 | 134927317 | CXCL14    | NM_004887    | chr5  | - | 134914970 | 134916970 | 2001 | 12.63403  |
| chr17 | 21096277  | 21119455  | TMEM11    | NM_003876    | chr17 | - | 21117909  | 21119909  | 1547 | 12.631775 |
| chr16 | 67138808  | 67147076  | C16orf70  | NM_025187    | chr16 | + | 67141913  | 67143913  | 2001 | 12.62491  |
| chr16 | 88712324  | 88722388  | CYBA      | NM_000101    | chr16 | - | 88717458  | 88719458  | 2001 | 12.60858  |
| chr11 | 295817    | 317285    | IFITM1    | NM_003641    | chr11 | + | 311989    | 313989    | 2001 | 12.56907  |
| chr19 | 43956681  | 43975815  | LYPD3     | NM_014400    | chr19 | - | 43969832  | 43971832  | 2001 | 12.56502  |
| chr20 | 35916509  | 35938513  | MANBAL    | NM_022077    | chr20 | + | 35916049  | 35918049  | 1541 | 12.5382   |
| chr13 | 51475987  | 51485403  | RNASEH2B  | NM_024570    | chr13 | + | 51481890  | 51483890  | 2001 | 12.524265 |
| chr5  | 170176994 | 170210860 | GABRP     | NM_014211    | chr5  | + | 170208721 | 170210721 | 2001 | 12.50212  |
| chrX  | 3603610   | 3636453   | PRKX      | NM_005044    | chrX  | - | 3631676   | 3633676   | 2001 | 12.49695  |
| chr1  | 85690829  | 85730036  | C1orf52   | NM_198077    | chr1  | - | 85725356  | 85727356  | 2001 | 12.49468  |
| chr1  | 35206112  | 35253181  | GJB3      | NM_024009    | chr1  | + | 35244788  | 35246788  | 2001 | 12.491675 |
| chr1  | 117207000 | 117223821 | IGSF3     | NM_001542    | chr1  | - | 117210315 | 117212315 | 2001 | 12.48773  |
| chr22 | 19943043  | 19967154  | COMT      | NM_007310    | chr22 | + | 19948068  | 19950068  | 2001 | 12.483715 |
| chrX  | 118522254 | 118546194 | SLC25A43  | NM_145305    | chrX  | + | 118531256 | 118533256 | 2001 | 12.457385 |
| chr6  | 37756108  | 37791052  | ZFAND3    | NM_021943    | chr6  | + | 37785305  | 37787305  | 2001 | 12.45501  |
| chr12 | 77270367  | 77284882  | CSRP2     | NM_001321    | chr12 | - | 77272800  | 77274800  | 2001 | 12.39201  |
| chr1  | 228332351 | 228347110 | GUK1      | NM_001159391 | chr1  | + | 228330402 | 228332402 | 52   | 12.3793   |
| chrX  | 153655472 | 153675381 | FAM50A    | NM_004699    | chrX  | + | 153670483 | 153672483 | 2001 | 12.37644  |
| chr1  | 95284915  | 95294043  | SLC44A3   | NM_152369    | chr1  | + | 95284098  | 95286098  | 1184 | 12.356235 |
| chr1  | 200693338 | 200710964 | CAMSAP1L1 | NM_203459    | chr1  | + | 200706684 | 200708684 | 2001 | 12.348765 |
| chr20 | 23616142  | 23634971  | CST3      | NM_000099    | chr20 | - | 23618575  | 23620575  | 2001 | 12.34836  |

|       |           |           |          |              |       |   |           |           |      |            |
|-------|-----------|-----------|----------|--------------|-------|---|-----------|-----------|------|------------|
| chr16 | 85013241  | 85060149  | ZDHHC7   | NM_017740    | chr16 | - | 85045142  | 85047142  | 2001 | 12.33332   |
| chr1  | 153924325 | 153940770 | CRTC2    | NM_181715    | chr1  | - | 153931044 | 153933044 | 2001 | 12.330925  |
| chr17 | 1448830   | 1484774   | PITPNA   | NM_006224    | chr17 | - | 1466111   | 1468111   | 2001 | 12.32418   |
| chr3  | 46720057  | 46744132  | ALS2CL   | NM_182775    | chr3  | - | 46718900  | 46720900  | 844  | 12.318315  |
| chr6  | 150461399 | 150497515 | PPP1R14C | NM_030949    | chr6  | + | 150462186 | 150464186 | 2001 | 12.310275  |
| chr3  | 50643241  | 50668187  | MAPKAPK3 | NM_004635    | chr3  | + | 50652599  | 50654599  | 2001 | 12.309995  |
| chrX  | 53240537  | 53297788  | KDM5C    | NM_004187    | chrX  | - | 53254605  | 53256605  | 2001 | 12.30971   |
| chr11 | 117054775 | 117073728 | TAGLN    | NM_003186    | chr11 | + | 117068038 | 117070038 | 2001 | 12.289255  |
| chr12 | 33045434  | 33055865  | PKP2     | NM_004572    | chr12 | - | 33049781  | 33051781  | 2001 | 12.287155  |
| chr19 | 915029    | 931967    | C19orf22 | NM_138774    | chr19 | - | 913226    | 915226    | 198  | 12.28187   |
| chr11 | 773095    | 802283    | SLC25A22 | NM_024698    | chr11 | - | 796264    | 798264    | 2001 | 12.27839   |
| chr15 | 80955027  | 81002328  | FAM108C1 | NM_021214    | chr15 | + | 80985650  | 80987650  | 2001 | 12.27108   |
| chr9  | 139956910 | 139979454 | MAN1B1   | NM_016219    | chr9  | + | 139979415 | 139981415 | 40   | 12.264805  |
| chr10 | 126410223 | 126435925 | FAM53B   | NM_014661    | chr10 | - | 126432931 | 126434931 | 2001 | 12.260405  |
| chr19 | 39660805  | 39687187  | NCCRP1   | NM_001001414 | chr19 | + | 39685602  | 39687602  | 1586 | 12.2582    |
| chr20 | 616542    | 641955    | SRXN1    | NM_080725    | chr20 | - | 633891    | 635891    | 2001 | 12.231555  |
| chr2  | 236396558 | 236408363 | AGAP1    | NM_014914    | chr2  | + | 236400734 | 236402734 | 2001 | 12.218865  |
| chr18 | 9671222   | 9712475   | RAB31    | NM_006868    | chr18 | + | 9706226   | 9708226   | 2001 | 12.19566   |
| chr10 | 51542592  | 51555829  | MSMB     | NM_138634    | chr10 | + | 51547551  | 51549551  | 2001 | 12.1906675 |
| chr10 | 29912863  | 29924449  | SVIL     | NM_021738    | chr10 | - | 29923902  | 29925902  | 548  | 12.190425  |
| chr1  | 1156567   | 1188890   | SDF4     | NM_016547    | chr1  | - | 1167448   | 1169448   | 2001 | 12.17978   |
| chr20 | 57618847  | 57649697  | SLMO2    | NM_016045    | chr20 | - | 57617902  | 57619902  | 1056 | 12.17268   |
| chr12 | 57903728  | 57920825  | MBD6     | NM_052897    | chr12 | + | 57914657  | 57916657  | 2001 | 12.171715  |
| chr2  | 219132248 | 219163140 | AAMP     | NM_001087    | chr2  | - | 219134894 | 219136894 | 2001 | 12.16967   |



|       |           |           |         |              |       |   |           |           |      |           |
|-------|-----------|-----------|---------|--------------|-------|---|-----------|-----------|------|-----------|
| chr19 | 41892212  | 41922464  | BCKDHA  | NM_001164783 | chr19 | + | 41901692  | 41903692  | 2001 | 12.167135 |
| chr14 | 23290070  | 23319480  | MMP14   | NM_004995    | chr14 | + | 23303791  | 23305791  | 2001 | 12.16591  |
| chr22 | 19086492  | 19139196  | DGCR2   | NM_005137    | chr22 | - | 19109968  | 19111968  | 2001 | 12.16336  |
| chr16 | 87554     | 148084    | RHBDF1  | NM_022450    | chr16 | - | 122630    | 124630    | 2001 | 12.156165 |
| chr2  | 242478037 | 242514972 | BOK     | NM_032515    | chr2  | + | 242496190 | 242498190 | 2001 | 12.153015 |
| chr13 | 111262447 | 111296104 | CARKD   | NM_018210    | chr13 | + | 111266006 | 111268006 | 2001 | 12.141155 |
| chr5  | 145300806 | 145321580 | SH3RF2  | NM_152550    | chr5  | + | 145314124 | 145316124 | 2001 | 12.127815 |
| chr5  | 139697576 | 139729229 | HBEGF   | NM_001945    | chr5  | - | 139726189 | 139728189 | 2001 | 12.117205 |
| chr1  | 228590312 | 228618255 | HIST3H3 | NM_003493    | chr1  | - | 228613027 | 228615027 | 2001 | 12.108385 |
| chr1  | 156228649 | 156254944 | TMEM79  | NM_032323    | chr1  | + | 156252068 | 156254068 | 2001 | 12.10823  |
| chr17 | 39093268  | 39114602  | KRT23   | NM_015515    | chr17 | - | 39093837  | 39095837  | 2001 | 12.107015 |
| chr3  | 72494135  | 72507836  | RYBP    | NM_012234    | chr3  | - | 72495775  | 72497775  | 2001 | 12.105205 |
| chr10 | 102733345 | 102767241 | MRPL43  | NM_176794    | chr10 | - | 102747273 | 102749273 | 2001 | 12.105185 |
| chr18 | 47795600  | 47812996  | MBD1    | NM_015847    | chr18 | - | 47808145  | 47810145  | 2001 | 12.09443  |
| chr7  | 48121991  | 48132258  | UPP1    | NM_181597    | chr7  | + | 48126353  | 48128353  | 2001 | 12.0912   |
| chr19 | 50365436  | 50396433  | AKT1S1  | NM_032375    | chr19 | - | 50380579  | 50382579  | 2001 | 12.084145 |
| chr14 | 104175165 | 104202177 | ZFYVE21 | NM_024071    | chr14 | + | 104180143 | 104182143 | 2001 | 12.08397  |
| chr11 | 94467849  | 94500373  | AMOTL1  | NM_130847    | chr11 | + | 94499506  | 94501506  | 868  | 12.07969  |
| chr1  | 159961345 | 160013113 | PIGM    | NM_145167    | chr1  | - | 160001784 | 160003784 | 2001 | 12.054365 |
| chr12 | 113373994 | 113386773 | OAS3    | NM_006187    | chr12 | + | 113374247 | 113376247 | 2001 | 12.05103  |
| chr12 | 80086737  | 80100460  | PAWR    | NM_002583    | chr12 | - | 80084791  | 80086791  | 55   | 12.04259  |
| chr1  | 21591335  | 21625976  | ECE1    | NM_001397    | chr1  | - | 21616983  | 21618983  | 2001 | 12.04061  |
| chr2  | 110351878 | 110373216 | ANKRD57 | NM_023016    | chr2  | + | 110369909 | 110371909 | 2001 | 12.032155 |
| chr2  | 220092676 | 220117258 | ATG9A   | NM_024085    | chr2  | - | 220094362 | 220096362 | 2001 | 12.025965 |

|       |           |           |          |              |       |   |           |           |      |             |
|-------|-----------|-----------|----------|--------------|-------|---|-----------|-----------|------|-------------|
| chr9  | 136179690 | 136232109 | SURF1    | NM_003172    | chr9  | - | 136223362 | 136225362 | 2001 | 12.01509    |
| chr6  | 10399769  | 10431988  | TFAP2A   | NM_003220    | chr6  | - | 10415471  | 10417471  | 2001 | 12.001925   |
| chr9  | 136179690 | 136232109 | SURF2    | NM_017503    | chr9  | + | 136221419 | 136223419 | 2001 | 11.99746    |
| chr12 | 133400665 | 133443009 | GOLGA3   | NM_005895    | chr12 | - | 133405289 | 133407289 | 2001 | 11.99701    |
| chr19 | 7675216   | 7711628   | STXBP2   | NM_006949    | chr19 | + | 7699989   | 7701989   | 2001 | 11.989265   |
| chr3  | 118867394 | 118892534 | UPK1B    | NM_006952    | chr3  | + | 118890423 | 118892423 | 2001 | 11.978865   |
| chr11 | 94963016  | 94978645  | SESN3    | NM_144665    | chr11 | - | 94964247  | 94966247  | 2001 | 11.97292    |
| chr22 | 50294685  | 50316673  | CRELD2   | NM_024324    | chr22 | + | 50310281  | 50312281  | 2001 | 11.97247    |
| chr9  | 139292909 | 139320166 | SDCCAG3  | NM_006643    | chr9  | - | 139305055 | 139307055 | 2001 | 11.96415    |
| chr14 | 93640204  | 93659637  | MOAP1    | NM_022151    | chr14 | - | 93651250  | 93653250  | 2001 | 11.96047    |
| chr11 | 44582903  | 44599211  | CD82     | NM_002231    | chr11 | + | 44585139  | 44587139  | 2001 | 11.936975   |
| chr5  | 150948674 | 150971122 | FAT2     | NM_001447    | chr5  | - | 150948506 | 150950506 | 1833 | 11.93504    |
| chr4  | 6441638   | 6614388   | MAN2B2   | NM_015274    | chr4  | + | 6574900   | 6576900   | 2001 | 11.918025   |
| chr7  | 95943738  | 95979147  | SLC25A13 | NM_014251    | chr7  | - | 95951460  | 95953460  | 2001 | 11.916265   |
| chr22 | 30768424  | 30839322  | SEC14L2  | NM_033382    | chr22 | + | 30790931  | 30792931  | 2001 | 11.911725   |
| chr4  | 57503292  | 57564674  | HOPX     | NM_139212    | chr4  | - | 57547873  | 57549873  | 2001 | 11.91043833 |
| chr6  | 44085111  | 44117431  | TMEM63B  | NM_018426    | chr6  | + | 44093374  | 44095374  | 2001 | 11.90953    |
| chr10 | 128591612 | 128599544 | DOCK1    | NM_001380    | chr10 | + | 128592021 | 128594021 | 2001 | 11.887425   |
| chr3  | 122503777 | 122520075 | DIRC2    | NM_032839    | chr3  | + | 122511899 | 122513899 | 2001 | 11.88213    |
| chr18 | 77609582  | 77736239  | PQLC1    | NM_025078    | chr18 | - | 77711654  | 77713654  | 2001 | 11.87862    |
| chr16 | 84396001  | 84439135  | ATP2C2   | NM_014861    | chr16 | + | 84400131  | 84402131  | 2001 | 11.87298    |
| chr11 | 63571799  | 63590328  | C11orf84 | NM_138471    | chr11 | + | 63578921  | 63580921  | 2001 | 11.86056    |
| chr19 | 5825479   | 5874110   | FUT3     | NM_001097641 | chr19 | - | 5851486   | 5853486   | 2001 | 11.8452     |
| chr19 | 47228305  | 47266229  | FKRP     | NM_024301    | chr19 | + | 47247301  | 47249301  | 2001 | 11.843395   |

|       |           |           |          |              |       |   |           |           |      |            |
|-------|-----------|-----------|----------|--------------|-------|---|-----------|-----------|------|------------|
| chr11 | 64070818  | 64089422  | PRDX5    | NM_181652    | chr11 | + | 64083567  | 64085567  | 2001 | 11.836165  |
| chr19 | 33991619  | 34018980  | PEPD     | NM_001166057 | chr19 | - | 34012800  | 34014800  | 2001 | 11.828775  |
| chr19 | 54638567  | 54678454  | CNOT3    | NM_014516    | chr19 | + | 54639434  | 54641434  | 2001 | 11.79739   |
| chr5  | 148493375 | 148520567 | ABLIM3   | NM_014945    | chr5  | + | 148519052 | 148521052 | 1516 | 11.797     |
| chr17 | 74003406  | 74047494  | EVPL     | NM_001988    | chr17 | - | 74023508  | 74025508  | 2001 | 11.76474   |
| chr8  | 28550321  | 28601694  | EXTL3    | NM_001440    | chr8  | + | 28557151  | 28559151  | 2001 | 11.74888   |
| chr6  | 29593957  | 29609459  | GABBR1   | NM_021904    | chr6  | - | 29600963  | 29602963  | 2001 | 11.745025  |
| chr13 | 114497366 | 114582144 | GAS6     | NM_001143946 | chr13 | - | 114536715 | 114538715 | 2001 | 11.73329   |
| chr17 | 7290452   | 7303732   | PLSCR3   | NM_020360    | chr17 | - | 7297844   | 7299844   | 2001 | 11.729385  |
| chr15 | 35278654  | 35292378  | ZNF770   | NM_014106    | chr15 | - | 35280498  | 35282498  | 2001 | 11.72731   |
| chr8  | 144876537 | 144921747 | PUF60    | NM_078480    | chr8  | - | 144911538 | 144913538 | 2001 | 11.7271625 |
| chr17 | 7727059   | 7785278   | KDM6B    | NM_001080424 | chr17 | + | 7741233   | 7743233   | 2001 | 11.715415  |
| chr8  | 99278847  | 99310368  | NIPAL2   | NM_024759    | chr8  | - | 99306622  | 99308622  | 2001 | 11.714105  |
| chr10 | 11818136  | 11880621  | C10orf47 | NM_153256    | chr10 | + | 11863395  | 11865395  | 2001 | 11.71315   |
| chr16 | 1399281   | 1466856   | C16orf42 | NM_001001410 | chr16 | - | 1401874   | 1403874   | 2001 | 11.711785  |
| chr19 | 36434453  | 36484572  | SDHAF1   | NM_001042631 | chr19 | + | 36484088  | 36486088  | 485  | 11.71172   |
| chr16 | 87554     | 148084    | SNRNP25  | NM_024571    | chr16 | + | 101827    | 103827    | 2001 | 11.70523   |
| chr22 | 44289476  | 44321066  | PNPLA3   | NM_025225    | chr22 | + | 44317617  | 44319617  | 2001 | 11.704015  |
| chr17 | 19137019  | 19166825  | EPN2     | NM_148921    | chr17 | + | 19138688  | 19140688  | 2001 | 11.690105  |
| chr1  | 35206112  | 35253181  | GJB5     | NM_005268    | chr1  | + | 35218719  | 35220719  | 2001 | 11.68649   |
| chr4  | 99564330  | 99583295  | TSPAN5   | NM_005723    | chr4  | - | 99579813  | 99581813  | 2001 | 11.68408   |
| chr11 | 117945426 | 118039781 | TMPRSS4  | NM_019894    | chr11 | + | 117945725 | 117947725 | 2001 | 11.6690425 |
| chrX  | 9978190   | 10020162  | WWC3     | NM_015691    | chrX  | + | 9981793   | 9983793   | 2001 | 11.65148   |
| chrX  | 152595785 | 152616674 | ZNF275   | NM_001080485 | chrX  | + | 152597611 | 152599611 | 2001 | 11.64723   |

|       |           |           |          |              |       |   |           |           |      |            |
|-------|-----------|-----------|----------|--------------|-------|---|-----------|-----------|------|------------|
| chr11 | 120075531 | 120104355 | OAF      | NM_178507    | chr11 | + | 120079745 | 120081745 | 2001 | 11.639355  |
| chr14 | 105453670 | 105490364 | CDCA4    | NM_145701    | chr14 | - | 105487426 | 105489426 | 2001 | 11.6332375 |
| chr19 | 51476183  | 51644831  | KLK7     | NM_139277    | chr19 | - | 51487072  | 51489072  | 2001 | 11.61729   |
| chr9  | 95058308  | 95090060  | NOL8     | NM_017948    | chr9  | - | 95087877  | 95089877  | 2001 | 11.602285  |
| chr9  | 124463964 | 124587585 | DAB2IP   | NM_138709    | chr9  | + | 124503062 | 124505062 | 2001 | 11.5993425 |
| chr4  | 6257608   | 6341662   | WFS1     | NM_006005    | chr4  | + | 6269575   | 6271575   | 2001 | 11.58049   |
| chr11 | 119594959 | 119618862 | PVRL1    | NM_203286    | chr11 | - | 119599436 | 119601436 | 2001 | 11.57493   |
| chr19 | 47228305  | 47266229  | STRN4    | NM_013403    | chr19 | - | 47249721  | 47251721  | 2001 | 11.565355  |
| chr9  | 93557423  | 93584252  | SYK      | NM_003177    | chr9  | + | 93562010  | 93564010  | 2001 | 11.562     |
| chrX  | 68332180  | 68391841  | PJA1     | NM_145119    | chrX  | - | 68385366  | 68387366  | 2001 | 11.55869   |
| chr17 | 25920186  | 25959651  | LGALS9   | NM_009587    | chr17 | + | 25956172  | 25958172  | 2001 | 11.5510525 |
| chr1  | 151558636 | 151592401 | SNX27    | NM_030918    | chr1  | + | 151582660 | 151584660 | 2001 | 11.540205  |
| chr4  | 1719571   | 1752906   | TACC3    | NM_006342    | chr4  | + | 1721264   | 1723264   | 2001 | 11.52627   |
| chr1  | 888327    | 909325    | NOC2L    | NM_015658    | chr1  | - | 894680    | 896680    | 2001 | 11.525635  |
| chr1  | 26128194  | 26159482  | FAM54B   | NM_019557    | chr1  | + | 26144682  | 26146682  | 2001 | 11.51243   |
| chr22 | 37940634  | 37964044  | CDC42EP1 | NM_152243    | chr22 | + | 37954469  | 37956469  | 2001 | 11.506315  |
| chr22 | 38021452  | 38047912  | SH3BP1   | NM_018957    | chr22 | + | 38033682  | 38035682  | 2001 | 11.49545   |
| chr2  | 220092676 | 220117258 | STK16    | NM_001008910 | chr2  | + | 220108190 | 220110190 | 2001 | 11.48918   |
| chr12 | 8972156   | 8981968   | A2ML1    | NM_144670    | chr12 | + | 8973148   | 8975148   | 2001 | 11.48883   |
| chr3  | 38025556  | 38048442  | VILL     | NM_015873    | chr3  | + | 38033076  | 38035076  | 2001 | 11.4816    |
| chr20 | 61896072  | 61915408  | ARFGAP1  | NM_175609    | chr20 | + | 61902163  | 61904163  | 2001 | 11.478545  |
| chr17 | 79990713  | 80005331  | DCXR     | NM_016286    | chr17 | - | 79995574  | 79997574  | 2001 | 11.47795   |
| chr16 | 30425215  | 30446490  | DCTPP1   | NM_024096    | chr16 | - | 30441374  | 30443374  | 2001 | 11.4655    |
| chrX  | 148578328 | 148615217 | IDS      | NM_006123    | chrX  | - | 148586885 | 148588885 | 2001 | 11.4554275 |

|       |           |           |          |              |       |   |           |           |      |            |
|-------|-----------|-----------|----------|--------------|-------|---|-----------|-----------|------|------------|
| chr4  | 166124775 | 166170461 | KLHL2    | NM_007246    | chr4  | + | 166126768 | 166128768 | 2001 | 11.45276   |
| chr20 | 3002214   | 3030616   | MRPS26   | NM_030811    | chr20 | + | 3024673   | 3026673   | 2001 | 11.45166   |
| chr19 | 33849282  | 33939406  | CEBPG    | NM_001806    | chr19 | + | 33862607  | 33864607  | 2001 | 11.44546   |
| chr5  | 148704668 | 148735548 | GRPEL2   | NM_152407    | chr5  | + | 148722975 | 148724975 | 2001 | 11.43062   |
| chr17 | 79602642  | 79631371  | NPLOC4   | NM_017921    | chr17 | - | 79604139  | 79606139  | 2001 | 11.413825  |
| chr19 | 1584414   | 1606980   | UQCR11   | NM_006830    | chr19 | - | 1605484   | 1607484   | 1497 | 11.411285  |
| chr14 | 105210505 | 105253607 | SIVA1    | NM_021709    | chr14 | + | 105217468 | 105219468 | 2001 | 11.4111175 |
| chr6  | 34524724  | 34555372  | SPDEF    | NM_012391    | chr6  | - | 34524092  | 34526092  | 1369 | 11.39331   |
| chr17 | 18355351  | 18403347  | LGALS9C  | NM_001040078 | chr17 | + | 18378097  | 18380097  | 2001 | 11.391385  |
| chr2  | 220092676 | 220117258 | ANKZF1   | NM_018089    | chr2  | + | 220092477 | 220094477 | 1802 | 11.38921   |
| chr9  | 138842810 | 138868220 | UBAC1    | NM_016172    | chr9  | - | 138853227 | 138855227 | 2001 | 11.37537   |
| chr11 | 1946481   | 1967269   | MRPL23   | NM_021134    | chr11 | + | 1966500   | 1968500   | 770  | 11.372725  |
| chr7  | 43607830  | 43631414  | STK17A   | NM_004760    | chr7  | + | 43620690  | 43622690  | 2001 | 11.37005   |
| chr11 | 102634206 | 102654918 | MMP10    | NM_002425    | chr11 | - | 102651360 | 102653360 | 2001 | 11.37004   |
| chr3  | 184406961 | 184507038 | MAGEF1   | NM_022149    | chr3  | - | 184429837 | 184431837 | 2001 | 11.36594   |
| chr1  | 33713869  | 33747828  | ZNF362   | NM_152493    | chr1  | + | 33720172  | 33722172  | 2001 | 11.364935  |
| chr1  | 1967118   | 2017251   | PRKCZ    | NM_002744    | chr1  | + | 1979907   | 1981907   | 2001 | 11.347775  |
| chr13 | 99849008  | 99867926  | UBAC2    | NM_177967    | chr13 | + | 99851161  | 99853161  | 2001 | 11.343875  |
| chr5  | 156874449 | 156906584 | NIPAL4   | NM_001172292 | chr5  | + | 156885025 | 156887025 | 2001 | 11.32182   |
| chr9  | 131178356 | 131190519 | CERCAM   | NM_016174    | chr9  | + | 131180757 | 131182757 | 2001 | 11.31707   |
| chr21 | 45529311  | 45556491  | C21orf33 | NM_198155    | chr21 | + | 45551492  | 45553492  | 2001 | 11.31608   |
| chr14 | 24848454  | 24866398  | NYNRIN   | NM_025081    | chr14 | + | 24865990  | 24867990  | 409  | 11.30548   |
| chr10 | 5710477   | 5733979   | ASB13    | NM_024701    | chr10 | - | 5708559   | 5710559   | 83   | 11.304035  |
| chr2  | 235372534 | 235406742 | ARL4C    | NM_005737    | chr2  | - | 235405694 | 235407694 | 1049 | 11.280385  |

|       |           |           |          |              |       |   |           |           |      |             |
|-------|-----------|-----------|----------|--------------|-------|---|-----------|-----------|------|-------------|
| chr22 | 45127222  | 45220021  | ARHGAP8  | NM_181335    | chr22 | + | 45146436  | 45148436  | 2001 | 11.27462    |
| chr3  | 38166366  | 38193726  | ACAA1    | NM_001607    | chr3  | - | 38178734  | 38180734  | 2001 | 11.26649    |
| chr1  | 2270604   | 2337047   | RER1     | NM_007033    | chr1  | + | 2321212   | 2323212   | 2001 | 11.257975   |
| chr1  | 11973491  | 12003749  | KIAA2013 | NM_138346    | chr1  | - | 11986481  | 11988481  | 2001 | 11.253155   |
| chr17 | 7727059   | 7785278   | TMEM88   | NM_203411    | chr17 | + | 7756382   | 7758382   | 2001 | 11.23941    |
| chr18 | 77609582  | 77736239  | HSBP1L1  | NM_001136180 | chr18 | + | 77722580  | 77724580  | 2001 | 11.2342     |
| chr16 | 28850366  | 28885949  | SH2B1    | NM_015503    | chr16 | + | 28873312  | 28875312  | 2001 | 11.23294    |
| chr3  | 122013329 | 122085535 | CSTA     | NM_005213    | chr3  | + | 122042009 | 122044009 | 2001 | 11.220925   |
| chr19 | 51476183  | 51644831  | KLK13    | NM_015596    | chr19 | - | 51568368  | 51570368  | 2001 | 11.204115   |
| chr16 | 522853    | 589194    | SOLH     | NM_005632    | chr16 | + | 575854    | 577854    | 2001 | 11.202475   |
| chr8  | 22458821  | 22493819  | KIAA1967 | NM_021174    | chr8  | + | 22460537  | 22462537  | 2001 | 11.202      |
| chr22 | 29701245  | 29736193  | GAS2L1   | NM_152237    | chr22 | + | 29700995  | 29702995  | 1751 | 11.18762333 |
| chr22 | 31685539  | 31702800  | PIK3IP1  | NM_052880    | chr22 | - | 31688521  | 31690521  | 2001 | 11.14683    |
| chr3  | 51698670  | 51708227  | TEX264   | NM_015926    | chr3  | + | 51703220  | 51705220  | 2001 | 11.141855   |
| chr17 | 21147782  | 21212145  | MAP2K3   | NM_145109    | chr17 | + | 21185966  | 21187966  | 2001 | 11.14063    |
| chr1  | 23693264  | 23729185  | ZNF436   | NM_030634    | chr1  | - | 23694880  | 23696880  | 2001 | 11.12849    |
| chr20 | 52769299  | 52817846  | CYP24A1  | NM_001128915 | chr20 | - | 52790517  | 52792517  | 2001 | 11.12171    |
| chr10 | 81833834  | 81860985  | C10orf57 | NM_025125    | chr10 | + | 81836424  | 81838424  | 2001 | 11.099945   |
| chr8  | 22082447  | 22113668  | PHYHIP   | NM_014759    | chr8  | - | 22089852  | 22091852  | 2001 | 11.088925   |
| chr19 | 42653203  | 42753990  | DEDD2    | NM_133328    | chr19 | - | 42721814  | 42723814  | 2001 | 11.088135   |
| chr2  | 174826894 | 174848102 | SP3      | NM_003111    | chr2  | - | 174830431 | 174832431 | 2001 | 11.088035   |
| chr8  | 21925361  | 21969948  | FAM160B2 | NM_022749    | chr8  | + | 21944712  | 21946712  | 2001 | 11.06086    |
| chr9  | 101555428 | 101586576 | ANKS6    | NM_173551    | chr9  | - | 101558795 | 101560795 | 2001 | 11.05535    |
| chr1  | 157060676 | 157115194 | ETV3     | NM_005240    | chr1  | - | 157108178 | 157110178 | 2001 | 11.0474     |

|       |           |           |           |              |       |   |           |           |      |           |
|-------|-----------|-----------|-----------|--------------|-------|---|-----------|-----------|------|-----------|
| chr3  | 52003452  | 52021750  | ACY1      | NM_000666    | chr3  | + | 52015561  | 52017561  | 2001 | 11.04349  |
| chr1  | 159883546 | 159929591 | IGSF9     | NM_020789    | chr1  | - | 159915387 | 159917387 | 2001 | 11.031885 |
| chrX  | 3217250   | 3306692   | MXRA5     | NM_015419    | chrX  | - | 3264685   | 3266685   | 2001 | 11.025505 |
| chr22 | 18252222  | 18289234  | BID       | NM_197967    | chr22 | - | 18257259  | 18259259  | 2001 | 11.00911  |
| chrX  | 152196400 | 152228278 | PNMA3     | NM_013364    | chrX  | + | 152222764 | 152224764 | 2001 | 11.00528  |
| chr21 | 45946557  | 45975382  | KRTAP10-1 | NM_198691    | chr21 | - | 45960079  | 45962079  | 2001 | 11.001195 |
| chr4  | 1859872   | 1866693   | LETM1     | NM_012318    | chr4  | - | 1857975   | 1859975   | 104  | 10.98113  |
| chr3  | 38166366  | 38193726  | MYD88     | NM_002468    | chr3  | + | 38177967  | 38179967  | 2001 | 10.97652  |
| chr3  | 51424910  | 51432173  | RBM15B    | NM_013286    | chr3  | + | 51426729  | 51428729  | 2001 | 10.9744   |
| chr8  | 22082447  | 22113668  | POLR3D    | NM_001722    | chr8  | + | 22100617  | 22102617  | 2001 | 10.962275 |
| chr19 | 7675216   | 7711628   | XAB2      | NM_020196    | chr19 | - | 7694440   | 7696440   | 2001 | 10.946955 |
| chr3  | 124756640 | 124786316 | HEG1      | NM_020733    | chr3  | - | 124774803 | 124776803 | 2001 | 10.944705 |
| chr5  | 2742165   | 2758620   | IRX2      | NM_033267    | chr5  | - | 2751770   | 2753770   | 2001 | 10.9399   |
| chr7  | 148842035 | 148895078 | ZNF282    | NM_003575    | chr7  | + | 148890575 | 148892575 | 2001 | 10.93863  |
| chr14 | 23290070  | 23319480  | MRPL52    | NM_181307    | chr14 | + | 23297090  | 23299090  | 2001 | 10.934853 |
| chr16 | 841891    | 870973    | GNG13     | NM_016541    | chr16 | - | 850734    | 852734    | 2001 | 10.92847  |
| chr1  | 47071895  | 47078955  | MKNK1     | NM_198973    | chr1  | - | 47069967  | 47071967  | 73   | 10.91534  |
| chr16 | 1751543   | 1805396   | MAPK8IP3  | NM_015133    | chr16 | + | 1754219   | 1756219   | 2001 | 10.90265  |
| chr9  | 135985603 | 136020787 | RALGDS    | NM_006266    | chr9  | - | 135996562 | 135998562 | 2001 | 10.89973  |
| chr11 | 71163020  | 71212820  | NADSYN1   | NM_018161    | chr11 | + | 71162215  | 71164215  | 1196 | 10.89796  |
| chr19 | 1257485   | 1279145   | C19orf24  | NM_017914    | chr19 | + | 1273518   | 1275518   | 2001 | 10.888385 |
| chr4  | 77802544  | 77820798  | ANKRD56   | NM_001029870 | chr4  | - | 77819003  | 77821003  | 1796 | 10.87001  |
| chr2  | 73424696  | 73445705  | SMYD5     | NM_006062    | chr2  | + | 73439364  | 73441364  | 2001 | 10.86668  |
| chr13 | 52130902  | 52160066  | WDFY2     | NM_052950    | chr13 | + | 52156482  | 52158482  | 2001 | 10.86294  |

|       |           |           |          |              |       |   |           |           |      |             |
|-------|-----------|-----------|----------|--------------|-------|---|-----------|-----------|------|-------------|
| chr7  | 148842035 | 148895078 | ZNF398   | NM_170686    | chr7  | + | 148842558 | 148844558 | 2001 | 10.856575   |
| chr22 | 50348756  | 50362628  | PIM3     | NM_001001852 | chr22 | + | 50352141  | 50354141  | 2001 | 10.841035   |
| chr1  | 152446398 | 152493428 | CRCT1    | NM_019060    | chr1  | + | 152484976 | 152486976 | 2001 | 10.83777    |
| chr11 | 128757867 | 128825914 | KCNJ5    | NM_000890    | chr11 | + | 128759311 | 128761311 | 2001 | 10.83195    |
| chr9  | 136994928 | 137017705 | WDR5     | NM_052821    | chr9  | + | 137002912 | 137004912 | 2001 | 10.82848    |
| chr1  | 227921447 | 227938209 | SNAP47   | NM_053052    | chr1  | + | 227920695 | 227922695 | 1249 | 10.78879    |
| chr9  | 113798802 | 113803128 | LPAR1    | NM_057159    | chr9  | - | 113800366 | 113802366 | 2001 | 10.774145   |
| chr1  | 152538994 | 152555552 | LCE3E    | NM_178435    | chr1  | - | 152539249 | 152541249 | 2001 | 10.77159    |
| chr12 | 95042352  | 95064063  | TMCC3    | NM_020698    | chr12 | - | 95044325  | 95046325  | 2001 | 10.7635     |
| chr12 | 57586345  | 57629973  | NXPH4    | NM_007224    | chr12 | + | 57608576  | 57610576  | 2001 | 10.762595   |
| chr19 | 46954550  | 46990397  | PNMAL1   | NM_018215    | chr19 | - | 46974821  | 46976821  | 2001 | 10.75286    |
| chr9  | 139808714 | 139847309 | FBXW5    | NM_018998    | chr9  | - | 139839174 | 139841174 | 2001 | 10.74843333 |
| chr11 | 72898972  | 72949934  | P2RY2    | NM_176072    | chr11 | + | 72927342  | 72929342  | 2001 | 10.7464     |
| chr1  | 29553930  | 29581258  | PTPRU    | NM_133178    | chr1  | + | 29561026  | 29563026  | 2001 | 10.74027    |
| chr6  | 43412172  | 43449217  | DLK2     | NM_206539    | chr6  | - | 43423787  | 43425787  | 2001 | 10.734435   |
| chr2  | 106348568 | 106391183 | NCK2     | NM_003581    | chr2  | + | 106359518 | 106361518 | 2001 | 10.7335925  |
| chr11 | 10471196  | 10475120  | AMPD3    | NM_001172431 | chr11 | + | 10469866  | 10471866  | 671  | 10.72634    |
| chr20 | 288936    | 329777    | NRSN2    | NM_024958    | chr20 | + | 325368    | 327368    | 2001 | 10.722025   |
| chr7  | 98453862  | 98479514  | TRRAP    | NM_003496    | chr7  | + | 98474111  | 98476111  | 2001 | 10.71405    |
| chr19 | 39388747  | 39410567  | SIRT2    | NM_030593    | chr19 | - | 39390503  | 39392503  | 2001 | 10.701665   |
| chr19 | 1475913   | 1511153   | C19orf25 | NM_152482    | chr19 | - | 1479229   | 1481229   | 2001 | 10.691695   |
| chr1  | 44449089  | 44495031  | CCDC24   | NM_152499    | chr1  | + | 44455278  | 44457278  | 2001 | 10.684285   |
| chr9  | 100610128 | 100637163 | FOXE1    | NM_004473    | chr9  | + | 100613535 | 100615535 | 2001 | 10.67052    |
| chr19 | 15223011  | 15241472  | ILVBL    | NM_006844    | chr19 | - | 15236578  | 15238578  | 2001 | 10.6653725  |



|       |           |           |          |           |       |   |           |           |      |            |
|-------|-----------|-----------|----------|-----------|-------|---|-----------|-----------|------|------------|
| chr16 | 50708773  | 50785700  | CYLD     | NM_015247 | chr16 | + | 50773959  | 50775959  | 2001 | 10.66252   |
| chr10 | 98026954  | 98040887  | BLNK     | NM_013314 | chr10 | - | 98031334  | 98033334  | 2001 | 10.648925  |
| chr16 | 73062650  | 73101824  | ZFHX3    | NM_006885 | chr16 | - | 73082275  | 73084275  | 2001 | 10.639325  |
| chr1  | 1156567   | 1188890   | B3GALT6  | NM_080605 | chr1  | + | 1165627   | 1167627   | 2001 | 10.632765  |
| chr22 | 50218507  | 50245185  | BRD1     | NM_014577 | chr22 | - | 50218453  | 50220453  | 1947 | 10.595395  |
| chr6  | 99786160  | 99798811  | C6orf168 | NM_032511 | chr6  | - | 99797532  | 99799532  | 1280 | 10.59168   |
| chr5  | 178150663 | 178168305 | ZNF354A  | NM_005649 | chr5  | - | 178157704 | 178159704 | 2001 | 10.586115  |
| chr19 | 51476183  | 51644831  | KLK8     | NM_144507 | chr19 | - | 51504959  | 51506959  | 2001 | 10.5675425 |
| chr22 | 39362095  | 39387778  | APOBEC3B | NM_004900 | chr22 | + | 39376403  | 39378403  | 2001 | 10.560305  |
| chr1  | 29178724  | 29215975  | EPB41    | NM_203343 | chr1  | + | 29211601  | 29213601  | 2001 | 10.5549    |
| chr14 | 78057197  | 78089260  | SPTLC2   | NM_004863 | chr14 | - | 78083111  | 78085111  | 2001 | 10.55166   |
| chr19 | 39388747  | 39410567  | NFKBIB   | NM_002503 | chr19 | + | 39388613  | 39390613  | 1867 | 10.5483875 |
| chr8  | 144575780 | 144645387 | GSDMD    | NM_024736 | chr8  | + | 144638475 | 144640475 | 2001 | 10.532475  |
| chr9  | 139292909 | 139320166 | SNAPC4   | NM_003086 | chr9  | - | 139292890 | 139294890 | 1982 | 10.521835  |
| chr10 | 101414576 | 101432972 | ENTPD7   | NM_020354 | chr10 | + | 101417261 | 101419261 | 2001 | 10.520045  |
| chr16 | 1399281   | 1466856   | GNPTG    | NM_032520 | chr16 | + | 1399898   | 1401898   | 2001 | 10.517045  |
| chr1  | 35206112  | 35253181  | GJB4     | NM_153212 | chr1  | + | 35223340  | 35225340  | 2001 | 10.511895  |
| chr3  | 52073333  | 52094591  | DUSP7    | NM_001947 | chr3  | - | 52090462  | 52092462  | 2001 | 10.50713   |
| chr16 | 624067    | 646269    | RAB40C   | NM_021168 | chr16 | + | 638171    | 640171    | 2001 | 10.50198   |
| chr9  | 139292909 | 139320166 | PMPCA    | NM_015160 | chr9  | + | 139303114 | 139305114 | 2001 | 10.497975  |
| chr19 | 54638567  | 54678454  | TMC4     | NM_144686 | chr19 | - | 54676945  | 54678945  | 1510 | 10.48673   |
| chr1  | 230200071 | 230205958 | GALNT2   | NM_004481 | chr1  | + | 230200954 | 230202954 | 2001 | 10.45526   |
| chr12 | 120802319 | 120841648 | MSI1     | NM_002442 | chr12 | - | 120806959 | 120808959 | 2001 | 10.449495  |
| chr22 | 34314600  | 34324484  | LARGE    | NM_133642 | chr22 | - | 34316417  | 34318417  | 2001 | 10.44897   |

|       |           |           |          |              |       |   |           |           |      |           |
|-------|-----------|-----------|----------|--------------|-------|---|-----------|-----------|------|-----------|
| chr4  | 1292425   | 1389629   | KIAA1530 | NM_020894    | chr4  | + | 1339102   | 1341102   | 2001 | 10.428435 |
| chr19 | 50365436  | 50396433  | TBC1D17  | NM_024682    | chr19 | + | 50378680  | 50380680  | 2001 | 10.42823  |
| chr9  | 138378175 | 138433705 | MRPS2    | NM_016034    | chr9  | + | 138390481 | 138392481 | 2001 | 10.41134  |
| chr19 | 58299809  | 58330254  | ZNF552   | NM_024762    | chr19 | - | 58326282  | 58328282  | 2001 | 10.40219  |
| chr9  | 139003717 | 139036149 | C9orf69  | NM_152833    | chr9  | - | 139010732 | 139012732 | 2001 | 10.397455 |
| chr17 | 6545800   | 6585564   | MED31    | NM_016060    | chr17 | - | 6554955   | 6556955   | 2001 | 10.36788  |
| chr6  | 168417468 | 168535217 | FRMD1    | NM_024919    | chr6  | - | 168479840 | 168481840 | 2001 | 10.35431  |
| chr1  | 152766774 | 152797737 | LCE1C    | NM_178351    | chr1  | - | 152779108 | 152781108 | 2001 | 10.34552  |
| chr17 | 17375960  | 17418738  | MED9     | NM_018019    | chr17 | + | 17378298  | 17380298  | 2001 | 10.339455 |
| chr19 | 5666968   | 5715071   | C19orf70 | NM_205767    | chr19 | - | 5680912   | 5682912   | 2001 | 10.322685 |
| chr11 | 876245    | 929452    | CHID1    | NM_023947    | chr11 | - | 910875    | 912875    | 2001 | 10.303905 |
| chr19 | 7987183   | 7992330   | CTXN1    | NM_206833    | chr19 | - | 7991052   | 7993052   | 1279 | 10.29321  |
| chr14 | 105778313 | 105793904 | PACS2    | NM_015197    | chr14 | + | 105779079 | 105781079 | 2001 | 10.288845 |
| chr1  | 1156567   | 1188890   | FAM132A  | NM_001014980 | chr1  | - | 1182103   | 1184103   | 2001 | 10.281885 |
| chr22 | 43561483  | 43699652  | TLL12    | NM_015140    | chr22 | - | 43583138  | 43585138  | 2001 | 10.279405 |
| chr19 | 1475913   | 1511153   | REEP6    | NM_138393    | chr19 | + | 1489163   | 1491163   | 2001 | 10.279105 |
| chr2  | 88460982  | 88488662  | THNSL2   | NM_018271    | chr2  | + | 88467833  | 88469833  | 2001 | 10.24103  |
| chr19 | 915029    | 931967    | ARID3A   | NM_005224    | chr19 | + | 924035    | 926035    | 2001 | 10.24094  |
| chr17 | 3561568   | 3600311   | TMEM93   | NM_031298    | chr17 | + | 3570088   | 3572088   | 2001 | 10.23894  |
| chr3  | 181416053 | 181441569 | SOX2     | NM_003106    | chr3  | + | 181427720 | 181429720 | 2001 | 10.22905  |
| chr9  | 131582978 | 131598175 | C9orf114 | NM_016390    | chr9  | - | 131592086 | 131594086 | 2001 | 10.22426  |
| chr22 | 20201421  | 20303450  | RTN4R    | NM_023004    | chr22 | - | 20255817  | 20257817  | 2001 | 10.211405 |
| chr10 | 5710477   | 5733979   | C10orf18 | NM_017782    | chr10 | + | 5724799   | 5726799   | 2001 | 10.211245 |
| chr4  | 48334097  | 48344791  | SLAIN2   | NM_020846    | chr4  | + | 48341611  | 48343611  | 2001 | 10.21039  |

|       |           |           |          |              |       |   |           |           |      |            |
|-------|-----------|-----------|----------|--------------|-------|---|-----------|-----------|------|------------|
| chr17 | 41614110  | 41627282  | ETV4     | NM_001986    | chr17 | - | 41623306  | 41625306  | 2001 | 10.20039   |
| chr19 | 39970203  | 39995166  | TIMM50   | NM_001001563 | chr19 | + | 39969050  | 39971050  | 848  | 10.199085  |
| chr4  | 1719571   | 1752906   | TMEM129  | NM_138385    | chr4  | - | 1723085   | 1725085   | 2001 | 10.18936   |
| chr21 | 39628856  | 39683915  | KCNJ15   | NM_170737    | chr21 | + | 39642427  | 39644427  | 2001 | 10.17746   |
| chr2  | 70401600  | 70429779  | C2orf42  | NM_017880    | chr2  | - | 70418152  | 70420152  | 2001 | 10.17394   |
| chr16 | 54960412  | 54986405  | IRX5     | NM_005853    | chr16 | + | 54963109  | 54965109  | 2001 | 10.16918   |
| chr1  | 205458726 | 205484168 | CDK18    | NM_212503    | chr1  | + | 205471682 | 205473682 | 2001 | 10.16767   |
| chr11 | 61332418  | 61368669  | SYT7     | NM_004200    | chr11 | - | 61348299  | 61350299  | 2001 | 10.16638   |
| chrX  | 153126690 | 153155836 | L1CAM    | NM_024003    | chrX  | - | 153141400 | 153143400 | 2001 | 10.1561125 |
| chr14 | 96669441  | 96675161  | BDKRB2   | NM_000623    | chr14 | + | 96669133  | 96671133  | 1693 | 10.14933   |
| chr18 | 19744269  | 19766963  | GATA6    | NM_005257    | chr18 | + | 19747414  | 19749414  | 2001 | 10.1469    |
| chr11 | 46919088  | 46951815  | LRP4     | NM_002334    | chr11 | - | 46940174  | 46942174  | 2001 | 10.14451   |
| chr1  | 47656816  | 47703553  | PDZK1IP1 | NM_005764    | chr1  | - | 47655772  | 47657772  | 957  | 10.138505  |
| chr2  | 230117116 | 230138225 | PID1     | NM_017933    | chr2  | - | 230136058 | 230138058 | 2001 | 10.133505  |
| chr9  | 138378175 | 138433705 | C9orf116 | NM_144654    | chr9  | - | 138391762 | 138393762 | 2001 | 10.127895  |
| chr9  | 139956910 | 139979454 | UAP1L1   | NM_207309    | chr9  | + | 139969951 | 139971951 | 2001 | 10.122485  |
| chr20 | 61570799  | 61591310  | SLC17A9  | NM_022082    | chr20 | + | 61581997  | 61583997  | 2001 | 10.121735  |
| chr22 | 38438792  | 38481490  | PICK1    | NM_012407    | chr22 | + | 38451260  | 38453260  | 2001 | 10.11603   |
| chr12 | 57903728  | 57920825  | DDIT3    | NM_004083    | chr12 | - | 57914301  | 57916301  | 2001 | 10.11499   |
| chrX  | 152788889 | 152886398 | FAM58A   | NM_152274    | chrX  | - | 152864633 | 152866633 | 2001 | 10.100075  |
| chr11 | 64120048  | 64148336  | RPS6KA4  | NM_003942    | chr11 | + | 64124623  | 64126623  | 2001 | 10.099295  |
| chr16 | 58418355  | 58445950  | GINS3    | NM_022770    | chr16 | + | 58424296  | 58426296  | 2001 | 10.09046   |
| chr22 | 30768424  | 30839322  | MTFP1    | NM_016498    | chr22 | + | 30819718  | 30821718  | 2001 | 10.084395  |
| chr21 | 46345336  | 46398926  | C21orf70 | NM_058190    | chr21 | + | 46357953  | 46359953  | 2001 | 10.0792    |

|       |           |           |         |           |       |   |           |           |      |            |
|-------|-----------|-----------|---------|-----------|-------|---|-----------|-----------|------|------------|
| chr6  | 43412172  | 43449217  | TJAP1   | NM_080604 | chr6  | + | 43443259  | 43445259  | 2001 | 10.07825   |
| chr17 | 7727059   | 7785278   | CYB5D1  | NM_144607 | chr17 | + | 7759062   | 7761062   | 2001 | 10.07423   |
| chr17 | 45923475  | 45946142  | SP6     | NM_199262 | chr17 | - | 45933241  | 45935241  | 2001 | 10.07113   |
| chr3  | 183952701 | 183973845 | ALG3    | NM_005787 | chr3  | - | 183966760 | 183968760 | 2001 | 10.0698075 |
| chr6  | 31686023  | 31698854  | LY6G6C  | NM_025261 | chr6  | - | 31689511  | 31691511  | 2001 | 10.068535  |
| chr7  | 134875478 | 134898997 | WDR91   | NM_014149 | chr7  | - | 134896317 | 134898317 | 2001 | 10.064775  |
| chr1  | 888327    | 909325    | PLEKHN1 | NM_032129 | chr1  | + | 899875    | 901875    | 2001 | 10.063765  |
| chr1  | 44449089  | 44495031  | SLC6A9  | NM_201649 | chr1  | - | 44482998  | 44484998  | 2001 | 10.061905  |
| chr19 | 972743    | 992628    | WDR18   | NM_024100 | chr19 | + | 982326    | 984326    | 2001 | 10.06013   |
| chr12 | 132626853 | 132701450 | NOC4L   | NM_024078 | chr12 | + | 132626991 | 132628991 | 2001 | 10.055885  |
| chr16 | 90071241  | 90086885  | DBNDD1  | NM_024043 | chr16 | - | 90076530  | 90078530  | 2001 | 10.04736   |
| chr1  | 29553930  | 29581258  | MECR    | NM_016011 | chr1  | - | 29557455  | 29559455  | 2001 | 10.043965  |
| chr13 | 77461568  | 77469140  | KCTD12  | NM_138444 | chr13 | - | 77460541  | 77462541  | 974  | 10.04202   |
| chr1  | 111736771 | 111752468 | DENND2D | NM_024901 | chr1  | - | 111743282 | 111745282 | 2001 | 10.036785  |
| chr15 | 40526065  | 40543776  | PAK6    | NM_020168 | chr15 | + | 40530033  | 40532033  | 2001 | 10.02745   |
| chr10 | 102733345 | 102767241 | LZTS2   | NM_032429 | chr10 | + | 102754963 | 102756963 | 2001 | 10.024915  |
| chr3  | 122503777 | 122520075 | HSPBAP1 | NM_024610 | chr3  | - | 122512651 | 122514651 | 2001 | 10.009585  |
| chr13 | 114431242 | 114469570 | FAM70B  | NM_182614 | chr13 | + | 114460214 | 114462214 | 2001 | 10.00383   |
| chr19 | 8271522   | 8303388   | LASS4   | NM_024552 | chr19 | + | 8272215   | 8274215   | 2001 | 10.002885  |
| chr19 | 11030431  | 11063744  | YIPF2   | NM_024029 | chr19 | - | 11039358  | 11041358  | 2001 | 10.001995  |
| chrX  | 132547628 | 132579233 | GPC4    | NM_001448 | chrX  | - | 132549206 | 132551206 | 2001 | 9.99923    |
| chr16 | 67461797  | 67491401  | HSD11B2 | NM_000196 | chr16 | + | 67463034  | 67465034  | 2001 | 9.998925   |
| chr9  | 116912238 | 116933215 | COL27A1 | NM_032888 | chr9  | + | 116916229 | 116918229 | 2001 | 9.995555   |
| chr16 | 88906597  | 88943319  | GALNS   | NM_000512 | chr16 | - | 88923375  | 88925375  | 2001 | 9.96075    |

|       |           |           |           |              |       |   |           |           |      |             |
|-------|-----------|-----------|-----------|--------------|-------|---|-----------|-----------|------|-------------|
| chr6  | 47009940  | 47032302  | GPR110    | NM_153840    | chr6  | - | 47010083  | 47012083  | 2001 | 9.954065    |
| chr22 | 47077927  | 47137477  | CERK      | NM_022766    | chr22 | - | 47134153  | 47136153  | 2001 | 9.950325    |
| chr1  | 228590312 | 228618255 | TRIM11    | NM_145214    | chr1  | - | 228594518 | 228596518 | 2001 | 9.94841     |
| chr2  | 241761958 | 241840371 | C2orf54   | NM_024861    | chr2  | - | 241831453 | 241833453 | 2001 | 9.942995    |
| chr19 | 14037000  | 14057590  | PODNL1    | NM_024825    | chr19 | - | 14049290  | 14051290  | 2001 | 9.938905    |
| chr1  | 85354396  | 85373407  | LPAR3     | NM_012152    | chr1  | - | 85358897  | 85360897  | 2001 | 9.92818     |
| chr1  | 201281895 | 201351057 | TNNT2     | NM_001001432 | chr1  | - | 201346806 | 201348806 | 2001 | 9.92326     |
| chr19 | 34971471  | 34996464  | WTIP      | NM_001080436 | chr19 | + | 34970878  | 34972878  | 1408 | 9.92283     |
| chr6  | 168714811 | 168755667 | DACT2     | NM_214462    | chr6  | - | 168720403 | 168722403 | 2001 | 9.91734     |
| chr20 | 61570799  | 61591310  | DIDO1     | NM_080797    | chr20 | - | 61569305  | 61571305  | 507  | 9.91693     |
| chr19 | 5825479   | 5874110   | FUT6      | NM_001040701 | chr19 | - | 5839743   | 5841743   | 2001 | 9.91129     |
| chr1  | 36024866  | 36054992  | KIAA0319L | NM_024874    | chr1  | - | 36023038  | 36025038  | 173  | 9.9106475   |
| chr17 | 78970234  | 79033324  | BAIAP2    | NM_017451    | chr17 | + | 79006945  | 79008945  | 2001 | 9.907993333 |
| chr2  | 240979274 | 240985083 | PRR21     | NM_001080835 | chr2  | - | 240982400 | 240984400 | 2001 | 9.89413     |
| chr4  | 1292425   | 1389629   | CRIPAK    | NM_175918    | chr4  | + | 1383338   | 1385338   | 2001 | 9.888545    |
| chr11 | 111371287 | 111409893 | LAYN      | NM_178834    | chr11 | + | 111409231 | 111411231 | 663  | 9.88575     |
| chr17 | 5021528   | 5030702   | USP6      | NM_004505    | chr17 | + | 5029685   | 5031685   | 1018 | 9.870805    |
| chr8  | 21925361  | 21969948  | NUDT18    | NM_024815    | chr8  | - | 21966933  | 21968933  | 2001 | 9.867415    |
| chr12 | 93305894  | 93332883  | EEA1      | NM_003566    | chr12 | - | 93323108  | 93325108  | 2001 | 9.86469     |
| chr22 | 38829711  | 38866797  | KDEL3     | NM_016657    | chr22 | + | 38862081  | 38864081  | 2001 | 9.863615    |
| chr5  | 141475280 | 141495808 | NDFIP1    | NM_030571    | chr5  | + | 141486322 | 141488322 | 2001 | 9.849875    |
| chr2  | 131671193 | 131676794 | ARHGEF4   | NM_032995    | chr2  | + | 131672222 | 131674222 | 2001 | 9.847835    |
| chr20 | 62577478  | 62599434  | UCKL1     | NM_017859    | chr20 | - | 62587801  | 62589801  | 2001 | 9.84679     |
| chr1  | 232644843 | 232675041 | SIPA1L2   | NM_020808    | chr1  | - | 232651244 | 232653244 | 2001 | 9.838925    |

|       |           |           |          |              |       |   |           |           |      |           |
|-------|-----------|-----------|----------|--------------|-------|---|-----------|-----------|------|-----------|
| chr16 | 58057563  | 58078980  | MMP15    | NM_002428    | chr16 | + | 58057280  | 58059280  | 1718 | 9.83675   |
| chr17 | 2246728   | 2327104   | MNT      | NM_020310    | chr17 | - | 2304259   | 2306259   | 2001 | 9.83636   |
| chr11 | 1870114   | 1911561   | LSP1     | NM_002339    | chr11 | + | 1872198   | 1874198   | 2001 | 9.836245  |
| chr1  | 50880580  | 50896809  | DMRTA2   | NM_032110    | chr1  | - | 50889142  | 50891142  | 2001 | 9.83534   |
| chr3  | 48591876  | 48630973  | PFKFB4   | NM_004567    | chr3  | - | 48594228  | 48596228  | 2001 | 9.83078   |
| chr1  | 888327    | 909325    | KLHL17   | NM_198317    | chr1  | + | 893965    | 895965    | 2001 | 9.82833   |
| chrX  | 148709672 | 148721648 | TMEM185A | NM_032508    | chrX  | - | 148713488 | 148715488 | 2001 | 9.827735  |
| chr22 | 46319035  | 46401375  | WNT7B    | NM_058238    | chr22 | - | 46373009  | 46375009  | 2001 | 9.82464   |
| chr4  | 159080272 | 159098271 | FAM198B  | NM_016613    | chr4  | - | 159093719 | 159095719 | 2001 | 9.8232675 |
| chr19 | 31821850  | 31846252  | TSHZ3    | NM_020856    | chr19 | - | 31840191  | 31842191  | 2001 | 9.82145   |
| chr19 | 1584414   | 1606980   | MBD3     | NM_003926    | chr19 | - | 1592653   | 1594653   | 2001 | 9.812895  |
| chr4  | 2792295   | 2836724   | SH3BP2   | NM_003023    | chr4  | + | 2818539   | 2820539   | 2001 | 9.812665  |
| chr2  | 60771302  | 60813593  | BCL11A   | NM_138559    | chr2  | - | 60780634  | 60782634  | 2001 | 9.7995275 |
| chr22 | 21343719  | 21387005  | SLC7A4   | NM_004173    | chr22 | - | 21386848  | 21388848  | 158  | 9.78683   |
| chr12 | 54440169  | 54462471  | HOXC4    | NM_153633    | chr12 | + | 54445659  | 54447659  | 2001 | 9.785635  |
| chr17 | 71620684  | 71643820  | SDK2     | NM_001144952 | chr17 | - | 71640228  | 71642228  | 2001 | 9.777625  |
| chr15 | 76012857  | 76026398  | ODF3L1   | NM_175881    | chr15 | + | 76014317  | 76016317  | 2001 | 9.77715   |
| chr16 | 394909    | 405182    | AXIN1    | NM_181050    | chr16 | - | 402465    | 404465    | 2001 | 9.776615  |
| chr15 | 65359762  | 65371768  | RASL12   | NM_016563    | chr15 | - | 65360389  | 65362389  | 2001 | 9.77325   |
| chr10 | 48342622  | 48383979  | ZNF488   | NM_153034    | chr10 | + | 48353087  | 48355087  | 2001 | 9.77265   |
| chr1  | 159883546 | 159929591 | SLAMF9   | NM_033438    | chr1  | - | 159924045 | 159926045 | 2001 | 9.7559    |
| chr1  | 3518344   | 3571185   | WDR8     | NM_017818    | chr1  | - | 3566672   | 3568672   | 2001 | 9.75216   |
| chr9  | 114928505 | 114949331 | SUSD1    | NM_022486    | chr9  | - | 114937557 | 114939557 | 2001 | 9.751265  |
| chr22 | 24540625  | 24592935  | SUSD2    | NM_019601    | chr22 | + | 24575442  | 24577442  | 2001 | 9.732385  |

|       |           |           |           |              |       |   |           |           |      |            |
|-------|-----------|-----------|-----------|--------------|-------|---|-----------|-----------|------|------------|
| chr22 | 37581743  | 37623287  | C1QTNF6   | NM_182486    | chr22 | - | 37584331  | 37586331  | 2001 | 9.73118    |
| chr12 | 57586345  | 57629973  | SHMT2     | NM_005412    | chr12 | + | 57621354  | 57623354  | 2001 | 9.71805    |
| chr16 | 1270360   | 1295883   | TPSB2     | NM_024164    | chr16 | - | 1280186   | 1282186   | 2001 | 9.714775   |
| chr1  | 156228649 | 156254944 | SMG5      | NM_015327    | chr1  | - | 156252621 | 156254621 | 2001 | 9.71121    |
| chr4  | 2745473   | 2759510   | TNIP2     | NM_024309    | chr4  | - | 2758104   | 2760104   | 1407 | 9.707955   |
| chr16 | 88964649  | 89011300  | CBFA2T3   | NM_175931    | chr16 | - | 89007609  | 89009609  | 2001 | 9.707325   |
| chr19 | 46384392  | 46423983  | MYPOP     | NM_001012643 | chr19 | - | 46405863  | 46407863  | 2001 | 9.697145   |
| chr1  | 27704330  | 27734860  | CD164L2   | NM_207397    | chr1  | - | 27709806  | 27711806  | 2001 | 9.69566    |
| chr21 | 47797750  | 47876952  | DIP2A     | NM_206891    | chr21 | + | 47876860  | 47878860  | 93   | 9.69306875 |
| chr21 | 46016366  | 46036924  | KRTAP10-7 | NM_198689    | chr21 | + | 46018495  | 46020495  | 2001 | 9.672245   |
| chr19 | 50365436  | 50396433  | PNKP      | NM_007254    | chr19 | - | 50370823  | 50372823  | 2001 | 9.66861    |
| chr1  | 227053784 | 227083663 | PSEN2     | NM_012486    | chr1  | + | 227056271 | 227058271 | 2001 | 9.65452    |
| chr19 | 41892212  | 41922464  | EXOSC5    | NM_020158    | chr19 | - | 41903257  | 41905257  | 2001 | 9.652285   |
| chr1  | 152890432 | 152976512 | SPRR3     | NM_005416    | chr1  | + | 152972221 | 152974221 | 2001 | 9.651565   |
| chr17 | 47911707  | 47961940  | TAC4      | NM_170685    | chr17 | - | 47925380  | 47927380  | 2001 | 9.6409     |
| chr11 | 128757867 | 128825914 | TP53AIP1  | NM_022112    | chr11 | - | 128813295 | 128815295 | 2001 | 9.63656    |
| chr7  | 73404464  | 73445363  | ELN       | NM_001081755 | chr7  | + | 73440425  | 73442425  | 2001 | 9.63132    |
| chr6  | 109770501 | 109783369 | MICAL1    | NM_022765    | chr6  | - | 109777191 | 109779191 | 2001 | 9.620455   |
| chr20 | 22990310  | 23027965  | SSTR4     | NM_001052    | chr20 | + | 23014055  | 23016055  | 2001 | 9.617765   |
| chr17 | 78181923  | 78204421  | SLC26A11  | NM_173626    | chr17 | + | 78192198  | 78194198  | 2001 | 9.6171     |
| chr18 | 77437661  | 77455485  | CTDP1     | NM_048368    | chr18 | + | 77437799  | 77439799  | 2001 | 9.610415   |
| chr19 | 51476183  | 51644831  | KLK14     | NM_022046    | chr19 | - | 51587503  | 51589503  | 2001 | 9.60726    |
| chr2  | 149875969 | 149899674 | LYPD6B    | NM_177964    | chr2  | + | 149892979 | 149894979 | 2001 | 9.606515   |
| chr2  | 98329421  | 98349959  | ZAP70     | NM_207519    | chr2  | + | 98348867  | 98350867  | 1093 | 9.60425    |

|       |           |           |           |           |       |   |           |           |      |             |
|-------|-----------|-----------|-----------|-----------|-------|---|-----------|-----------|------|-------------|
| chr22 | 50644124  | 50705002  | MAPK12    | NM_002969 | chr22 | - | 50700090  | 50702090  | 2001 | 9.602215    |
| chr18 | 43890171  | 43946837  | RNF165    | NM_152470 | chr18 | + | 43912185  | 43914185  | 2001 | 9.59691     |
| chr6  | 43193281  | 43228402  | C6orf108  | NM_199184 | chr6  | - | 43197212  | 43199212  | 2001 | 9.5900125   |
| chr9  | 136179690 | 136232109 | MED22     | NM_133640 | chr9  | - | 136214973 | 136216973 | 2001 | 9.589026667 |
| chr19 | 45653031  | 45706144  | TRAPPC6A  | NM_024108 | chr19 | - | 45681486  | 45683486  | 2001 | 9.562945    |
| chr17 | 19239532  | 19268296  | B9D1      | NM_015681 | chr17 | - | 19266047  | 19268047  | 2001 | 9.556165    |
| chr11 | 876245    | 929452    | AP2A2     | NM_012305 | chr11 | + | 923839    | 925839    | 2001 | 9.54722     |
| chr19 | 40951630  | 40960118  | SERTAD3   | NM_203344 | chr19 | - | 40950283  | 40952283  | 654  | 9.545135    |
| chr12 | 121343678 | 121367415 | SPPL3     | NM_139015 | chr12 | - | 121342152 | 121344152 | 475  | 9.540455    |
| chr12 | 110149145 | 110205554 | C12orf34  | NM_032829 | chr12 | + | 110150185 | 110152185 | 2001 | 9.53605     |
| chr14 | 100836534 | 100864172 | WDR25     | NM_024515 | chr14 | + | 100840831 | 100842831 | 2001 | 9.53205     |
| chr7  | 158934084 | 158940390 | VIPR2     | NM_003382 | chr7  | - | 158937650 | 158939650 | 2001 | 9.526985    |
| chr4  | 100736595 | 100760442 | DAPP1     | NM_014395 | chr4  | + | 100735979 | 100737979 | 1385 | 9.526045    |
| chr6  | 31686023  | 31698854  | DDAH2     | NM_013974 | chr6  | - | 31698040  | 31700040  | 815  | 9.523575    |
| chr19 | 915029    | 931967    | KISS1R    | NM_032551 | chr19 | + | 915340    | 917340    | 2001 | 9.52022     |
| chr21 | 45946557  | 45975382  | KRTAP10-2 | NM_198693 | chr21 | - | 45971389  | 45973389  | 2001 | 9.51689     |
| chr17 | 1182239   | 1199243   | TUSC5     | NM_172367 | chr17 | + | 1180955   | 1182955   | 717  | 9.51596     |
| chr7  | 150971365 | 150988582 | SMARCD3   | NM_003078 | chr7  | - | 150974232 | 150976232 | 2001 | 9.510635    |
| chr2  | 238382351 | 238399356 | MLPH      | NM_024101 | chr2  | + | 238393876 | 238395876 | 2001 | 9.50835     |
| chr1  | 47874109  | 47911088  | FOXE3     | NM_012186 | chr1  | + | 47879742  | 47881742  | 2001 | 9.506755    |
| chr8  | 143859675 | 143883023 | LY6D      | NM_003695 | chr8  | - | 143868009 | 143870009 | 2001 | 9.505105    |
| chr3  | 52003452  | 52021750  | ABHD14A   | NM_015407 | chr3  | + | 52007040  | 52009040  | 2001 | 9.490175    |
| chr1  | 6324953   | 6478206   | ACOT7     | NM_181866 | chr1  | - | 6419005   | 6421005   | 2001 | 9.48978     |
| chr2  | 20821706  | 20854016  | HS1BP3    | NM_022460 | chr2  | - | 20850865  | 20852865  | 2001 | 9.484935    |



|       |           |           |          |              |       |   |           |           |      |           |
|-------|-----------|-----------|----------|--------------|-------|---|-----------|-----------|------|-----------|
| chr6  | 39199740  | 39293404  | KCNK16   | NM_032115    | chr6  | - | 39290331  | 39292331  | 2001 | 9.46951   |
| chr10 | 102733345 | 102767241 | C10orf2  | NM_021830    | chr10 | + | 102745291 | 102747291 | 2001 | 9.46525   |
| chr19 | 45860249  | 45903892  | ERCC2    | NM_001130867 | chr19 | - | 45873846  | 45875846  | 2001 | 9.46219   |
| chr11 | 295817    | 317285    | IFITM2   | NM_006435    | chr11 | + | 306105    | 308105    | 2001 | 9.457285  |
| chr8  | 1708282   | 1725186   | CLN8     | NM_018941    | chr8  | + | 1709868   | 1711868   | 2001 | 9.45718   |
| chr16 | 1270360   | 1295883   | TPSAB1   | NM_003294    | chr16 | + | 1288676   | 1290676   | 2001 | 9.44469   |
| chr22 | 20076835  | 20131975  | TRMT2A   | NM_182984    | chr22 | - | 20104769  | 20106769  | 2001 | 9.43948   |
| chr17 | 3845280   | 3870673   | ATP2A3   | NM_174958    | chr17 | - | 3867737   | 3869737   | 2001 | 9.4369275 |
| chr15 | 60872313  | 60907996  | RORA     | NM_134262    | chr15 | - | 60884708  | 60886708  | 2001 | 9.43559   |
| chr1  | 29137750  | 29143423  | OPRD1    | NM_000911    | chr1  | + | 29136652  | 29138652  | 903  | 9.429835  |
| chr2  | 206535079 | 206552476 | NRP2     | NM_201279    | chr2  | + | 206545222 | 206547222 | 2001 | 9.42972   |
| chr14 | 104175165 | 104202177 | XRCC3    | NM_005432    | chr14 | - | 104181824 | 104183824 | 2001 | 9.429605  |
| chr17 | 6545800   | 6585564   | KIAA0753 | NM_014804    | chr17 | - | 6544248   | 6546248   | 449  | 9.425035  |
| chr17 | 40188842  | 40272257  | DHX58    | NM_024119    | chr17 | - | 40264752  | 40266752  | 2001 | 9.406385  |
| chr22 | 50644124  | 50705002  | HDAC10   | NM_032019    | chr22 | - | 50689835  | 50691835  | 2001 | 9.39795   |
| chr11 | 117743890 | 117771914 | FXVD6    | NM_022003    | chr11 | - | 117747747 | 117749747 | 2001 | 9.392665  |
| chr11 | 113275364 | 113347623 | DRD2     | NM_016574    | chr11 | - | 113346002 | 113348002 | 1622 | 9.39099   |
| chrX  | 152705582 | 152728241 | TREX2    | NM_080701    | chrX  | - | 152711946 | 152713946 | 2001 | 9.37639   |
| chrX  | 15682701  | 15698864  | TMEM27   | NM_020665    | chrX  | - | 15683155  | 15685155  | 2001 | 9.36518   |
| chr8  | 20109870  | 20122543  | LZTS1    | NM_021020    | chr8  | - | 20112804  | 20114804  | 2001 | 9.36441   |
| chr19 | 4175654   | 4195619   | ANKRD24  | NM_133475    | chr19 | + | 4181349   | 4183349   | 2001 | 9.355115  |
| chr10 | 111932060 | 111966837 | MXI1     | NM_130439    | chr10 | + | 111965361 | 111967361 | 1477 | 9.350445  |
| chr6  | 137347664 | 137377636 | IL20RA   | NM_014432    | chr6  | - | 137366299 | 137368299 | 2001 | 9.343115  |
| chr4  | 184824209 | 184834251 | STOX2    | NM_020225    | chr4  | + | 184824507 | 184826507 | 2001 | 9.341645  |

|       |           |           |          |              |       |   |           |           |      |             |
|-------|-----------|-----------|----------|--------------|-------|---|-----------|-----------|------|-------------|
| chrX  | 51225618  | 51250623  | NUDT11   | NM_018159    | chrX  | - | 51239460  | 51241460  | 2001 | 9.3275      |
| chr20 | 1162786   | 1177651   | C20orf46 | NM_018354    | chr20 | - | 1165118   | 1167118   | 2001 | 9.326765    |
| chr21 | 43875346  | 43921162  | SLC37A1  | NM_018964    | chr21 | + | 43917740  | 43919740  | 2001 | 9.326575    |
| chr3  | 48591876  | 48630973  | UCN2     | NM_033199    | chr3  | - | 48601202  | 48603202  | 2001 | 9.316525    |
| chr1  | 227921447 | 227938209 | JMJD4    | NM_023007    | chr1  | - | 227923113 | 227925113 | 2001 | 9.314155    |
| chr9  | 95058308  | 95090060  | CENPP    | NM_001012267 | chr9  | + | 95085739  | 95087739  | 2001 | 9.31188     |
| chr12 | 113601604 | 113634274 | C12orf52 | NM_032848    | chr12 | + | 113621553 | 113623553 | 2001 | 9.302905    |
| chrX  | 6146130   | 6169910   | NLGN4X   | NM_181332    | chrX  | - | 6146707   | 6148707   | 2001 | 9.301035    |
| chr19 | 51476183  | 51644831  | KLK12    | NM_145895    | chr19 | - | 51538149  | 51540149  | 2001 | 9.292863333 |
| chrX  | 152788889 | 152886398 | ATP2B3   | NM_021949    | chrX  | + | 152799578 | 152801578 | 2001 | 9.288625    |
| chr16 | 85013241  | 85060149  | KIAA0513 | NM_014732    | chr16 | + | 85059408  | 85061408  | 742  | 9.27261     |
| chr4  | 188898781 | 188920838 | ZFP42    | NM_174900    | chr4  | + | 188914923 | 188916923 | 2001 | 9.27113     |
| chr19 | 1166754   | 1182017   | SBNO2    | NM_014963    | chr19 | - | 1174283   | 1176283   | 2001 | 9.25686     |
| chr3  | 50643241  | 50668187  | CISH     | NM_145071    | chr3  | - | 50649263  | 50651263  | 2001 | 9.25502     |
| chr16 | 55511858  | 55541111  | LPCAT2   | NM_017839    | chr16 | + | 55540911  | 55542911  | 201  | 9.245245    |
| chr22 | 50294685  | 50316673  | ALG12    | NM_024105    | chr22 | - | 50312107  | 50314107  | 2001 | 9.241785    |
| chr6  | 35161141  | 35186917  | SCUBE3   | NM_152753    | chr6  | + | 35180188  | 35182188  | 2001 | 9.2352      |
| chr3  | 46471173  | 46507999  | LTF      | NM_002343    | chr3  | - | 46506396  | 46508396  | 1604 | 9.2248      |
| chr5  | 126387354 | 126416222 | FLJ44606 | NM_001164479 | chr5  | - | 126409185 | 126411185 | 2001 | 9.21963     |
| chr4  | 8103609   | 8167709   | ABLIM2   | NM_032432    | chr4  | - | 8160560   | 8162560   | 2001 | 9.21703     |
| chr12 | 133278834 | 133305402 | PGAM5    | NM_138575    | chr12 | + | 133285391 | 133287391 | 2001 | 9.213725    |
| chr16 | 1270360   | 1295883   | TPSG1    | NM_012467    | chr16 | - | 1275255   | 1277255   | 2001 | 9.21218     |
| chr11 | 2396519   | 2482161   | TSSC4    | NM_005706    | chr11 | + | 2421521   | 2423521   | 2001 | 9.20646     |
| chr17 | 78181923  | 78204421  | SGSH     | NM_000199    | chr17 | - | 78194200  | 78196200  | 2001 | 9.20312     |

|       |           |           |          |              |       |   |           |           |      |             |
|-------|-----------|-----------|----------|--------------|-------|---|-----------|-----------|------|-------------|
| chr11 | 2396519   | 2482161   | KCNQ1    | NM_181798    | chr11 | + | 2480682   | 2482682   | 1480 | 9.18602     |
| chr12 | 132626853 | 132701450 | GALNT9   | NM_021808    | chr12 | - | 132690574 | 132692574 | 2001 | 9.18302     |
| chr2  | 159623209 | 159670535 | DAPL1    | NM_001017920 | chr2  | + | 159649827 | 159651827 | 2001 | 9.17009     |
| chr22 | 19835827  | 19861467  | C22orf29 | NM_024627    | chr22 | - | 19842372  | 19844372  | 2001 | 9.15575     |
| chr1  | 28653424  | 28670232  | MED18    | NM_017638    | chr1  | + | 28653511  | 28655511  | 2001 | 9.142575    |
| chr5  | 149621241 | 149673423 | CAMK2A   | NM_171825    | chr5  | - | 149669404 | 149671404 | 2001 | 9.13883     |
| chr17 | 80987576  | 81022214  | B3GNTL1  | NM_001009905 | chr17 | - | 81009687  | 81011687  | 2001 | 9.116325    |
| chr22 | 30654795  | 30698906  | GATSL3   | NM_001037666 | chr22 | - | 30685617  | 30687617  | 2001 | 9.1024      |
| chr10 | 45468979  | 45494878  | ZNF22    | NM_006963    | chr10 | + | 45494271  | 45496271  | 608  | 9.09407     |
| chr19 | 47108880  | 47131079  | PTGIR    | NM_000960    | chr19 | - | 47128355  | 47130355  | 2001 | 9.09221     |
| chr12 | 132626853 | 132701450 | DDX51    | NM_175066    | chr12 | - | 132628881 | 132630881 | 2001 | 9.087925    |
| chr12 | 10322979  | 10329177  | OLR1     | NM_002543    | chr12 | - | 10324791  | 10326791  | 2001 | 9.08718     |
| chr2  | 64332867  | 64372567  | PELI1    | NM_020651    | chr2  | - | 64371606  | 64373606  | 962  | 9.087135    |
| chr12 | 113601604 | 113634274 | DDX54    | NM_024072    | chr12 | - | 113623285 | 113625285 | 2001 | 9.08537     |
| chr22 | 20076835  | 20131975  | ZDHHC8   | NM_013373    | chr22 | + | 20117362  | 20119362  | 2001 | 9.08298     |
| chr17 | 79863562  | 79914497  | PCYT2    | NM_002861    | chr17 | - | 79869341  | 79871341  | 2001 | 9.08181     |
| chr8  | 145810690 | 145853931 | ARHGAP39 | NM_025251    | chr8  | - | 145838889 | 145840889 | 2001 | 9.080655    |
| chr12 | 52907538  | 52974591  | KRT74    | NM_175053    | chr12 | - | 52967610  | 52969610  | 2001 | 9.079515    |
| chr4  | 6379705   | 6398069   | PPP2R2C  | NM_181876    | chr4  | - | 6383598   | 6385598   | 2001 | 9.072355    |
| chr2  | 242066347 | 242090779 | PASK     | NM_015148    | chr2  | - | 242088879 | 242090879 | 1901 | 9.065865    |
| chr3  | 52839344  | 52879051  | ITIH4    | NM_002218    | chr3  | - | 52864718  | 52866718  | 2001 | 9.05982     |
| chr16 | 67956715  | 67978912  | PSMB10   | NM_002801    | chr16 | - | 67970754  | 67972754  | 2001 | 9.058715    |
| chr16 | 87554     | 148084    | MPG      | NM_002434    | chr16 | + | 126167    | 128167    | 2001 | 9.055611667 |
| chr11 | 111232676 | 111260356 | POU2AF1  | NM_006235    | chr11 | - | 111250158 | 111252158 | 2001 | 9.048575    |

|       |           |           |          |              |       |   |           |           |      |           |
|-------|-----------|-----------|----------|--------------|-------|---|-----------|-----------|------|-----------|
| chr13 | 108846248 | 108872802 | LIG4     | NM_206937    | chr13 | - | 108867883 | 108869883 | 2001 | 9.04767   |
| chr5  | 180022922 | 180091350 | FLT4     | NM_182925    | chr5  | - | 180076625 | 180078625 | 2001 | 9.0404575 |
| chr1  | 43601866  | 43618991  | FAM183A  | NM_001101376 | chr1  | + | 43611592  | 43613592  | 2001 | 9.03901   |
| chr17 | 73753291  | 73772471  | GALK1    | NM_000154    | chr17 | - | 73761281  | 73763281  | 2001 | 9.02258   |
| chr1  | 152690732 | 152743156 | KPRP     | NM_001025231 | chr1  | + | 152728504 | 152730504 | 2001 | 9.02005   |
| chr2  | 105458195 | 105486339 | POU3F3   | NM_006236    | chr2  | + | 105469967 | 105471967 | 2001 | 9.0184    |
| chr17 | 79863562  | 79914497  | PYCR1    | NM_153824    | chr17 | - | 79894969  | 79896969  | 2001 | 9.0183775 |
| chr2  | 128413325 | 128435195 | LIMS2    | NM_017980    | chr2  | - | 128422168 | 128424168 | 2001 | 9.011945  |
| chr4  | 94747048  | 94751020  | ATOH1    | NM_005172    | chr4  | + | 94748076  | 94750076  | 2001 | 9.01169   |
| chr18 | 56335092  | 56358769  | MALT1    | NM_173844    | chr18 | + | 56336616  | 56338616  | 2001 | 9.01018   |
| chr10 | 73150212  | 73158394  | CDH23    | NM_052836    | chr10 | + | 73154689  | 73156689  | 2001 | 9.000025  |
| chr16 | 67956715  | 67978912  | LCAT     | NM_000229    | chr16 | - | 67978016  | 67980016  | 897  | 8.98424   |
| chr1  | 40231729  | 40266485  | BMP8B    | NM_001720    | chr1  | - | 40254534  | 40256534  | 2001 | 8.98419   |
| chr22 | 46428603  | 46477087  | C22orf26 | NM_018280    | chr22 | - | 46450025  | 46452025  | 2001 | 8.9692    |
| chr10 | 45468979  | 45494878  | C10orf10 | NM_007021    | chr10 | - | 45474331  | 45476331  | 2001 | 8.967105  |
| chr11 | 72410734  | 72443595  | ARAP1    | NM_015242    | chr11 | - | 72433404  | 72435404  | 2001 | 8.965955  |
| chr11 | 92697654  | 92712948  | MTNR1B   | NM_005959    | chr11 | + | 92700787  | 92702787  | 2001 | 8.96546   |
| chr22 | 29596996  | 29614576  | EMID1    | NM_133455    | chr22 | + | 29599951  | 29601951  | 2001 | 8.96422   |
| chr1  | 22449528  | 22518459  | WNT4     | NM_030761    | chr1  | - | 22469520  | 22471520  | 2001 | 8.96147   |
| chr2  | 233346399 | 233399944 | CHRND    | NM_000751    | chr2  | + | 233388920 | 233390920 | 2001 | 8.960725  |
| chr20 | 31346656  | 31394565  | DNMT3B   | NM_175850    | chr20 | + | 31365656  | 31367656  | 2001 | 8.9604    |
| chr16 | 50708773  | 50785700  | NOD2     | NM_022162    | chr16 | + | 50729048  | 50731048  | 2001 | 8.95248   |
| chr22 | 50433899  | 50487027  | IL17REL  | NM_001001694 | chr22 | - | 50451056  | 50453056  | 2001 | 8.950165  |
| chr1  | 3518344   | 3571185   | TP73     | NM_005427    | chr1  | + | 3567127   | 3569127   | 2001 | 8.947465  |

|       |           |           |          |              |       |   |           |           |      |          |
|-------|-----------|-----------|----------|--------------|-------|---|-----------|-----------|------|----------|
| chr1  | 152766774 | 152797737 | LCE1D    | NM_178352    | chr1  | + | 152767225 | 152769225 | 2001 | 8.94657  |
| chr21 | 43875346  | 43921162  | RSPH1    | NM_080860    | chr21 | - | 43916402  | 43918402  | 2001 | 8.936485 |
| chr9  | 132375202 | 132384211 | C9orf50  | NM_199350    | chr9  | - | 132383056 | 132385056 | 1156 | 8.93427  |
| chr3  | 127347004 | 127389723 | PODXL2   | NM_015720    | chr3  | + | 127346037 | 127348037 | 1034 | 8.930475 |
| chr7  | 149461797 | 149478695 | ZNF467   | NM_207336    | chr7  | - | 149470296 | 149472296 | 2001 | 8.929165 |
| chr22 | 19086492  | 19139196  | DGCR14   | NM_022719    | chr22 | - | 19132191  | 19134191  | 2001 | 8.926185 |
| chr3  | 42736594  | 42759518  | HHATL    | NM_020707    | chr3  | - | 42744320  | 42746320  | 2001 | 8.923145 |
| chr8  | 144693187 | 144697531 | PYCRL    | NM_023078    | chr8  | - | 144691785 | 144693785 | 599  | 8.92247  |
| chr19 | 4175654   | 4195619   | SIRT6    | NM_016539    | chr19 | - | 4182597   | 4184597   | 2001 | 8.919395 |
| chr11 | 94240710  | 94280396  | FUT4     | NM_002033    | chr11 | + | 94275015  | 94277015  | 2001 | 8.9159   |
| chr22 | 21343719  | 21387005  | THAP7    | NM_030573    | chr22 | - | 21356405  | 21358405  | 2001 | 8.9157   |
| chr15 | 40627378  | 40652635  | C15orf52 | NM_207380    | chr15 | - | 40633169  | 40635169  | 2001 | 8.91493  |
| chr3  | 52839344  | 52879051  | MUSTN1   | NM_205853    | chr3  | - | 52869221  | 52871221  | 2001 | 8.9019   |
| chr19 | 18764089  | 18795912  | CRTC1    | NM_015321    | chr19 | + | 18792423  | 18794423  | 2001 | 8.89939  |
| chr10 | 123287251 | 123387515 | FGFR2    | NM_022970    | chr10 | - | 123357973 | 123359973 | 2001 | 8.89816  |
| chr1  | 24501883  | 24522705  | IL28RA   | NM_173065    | chr1  | - | 24513752  | 24515752  | 2001 | 8.896885 |
| chr19 | 46472008  | 46478958  | NOVA2    | NM_002516    | chr19 | - | 46476658  | 46478658  | 2001 | 8.89073  |
| chr21 | 47251012  | 47371276  | PCBP3    | NM_020528    | chr21 | + | 47267873  | 47269873  | 2001 | 8.886245 |
| chr11 | 1070844   | 1161749   | MUC2     | NM_002457    | chr11 | + | 1072873   | 1074873   | 2001 | 8.88563  |
| chr17 | 79168798  | 79232173  | C17orf56 | NM_144679    | chr17 | - | 79212892  | 79214892  | 2001 | 8.880565 |
| chr2  | 234651310 | 234670477 | DNAJB3   | NM_001001394 | chr2  | - | 234652662 | 234654662 | 2001 | 8.874995 |
| chr1  | 16539138  | 16574847  | ARHGEF19 | NM_153213    | chr1  | - | 16539105  | 16541105  | 1968 | 8.873325 |
| chr17 | 79863562  | 79914497  | SIRT7    | NM_016538    | chr17 | - | 79876059  | 79878059  | 2001 | 8.872535 |
| chr5  | 50674342  | 50682197  | ISL1     | NM_002202    | chr5  | + | 50676956  | 50678956  | 2001 | 8.86956  |

|       |           |           |           |              |       |   |           |           |      |            |
|-------|-----------|-----------|-----------|--------------|-------|---|-----------|-----------|------|------------|
| chr3  | 9597120   | 9625715   | LHFPL4    | NM_198560    | chr3  | - | 9595487   | 9597487   | 368  | 8.86267    |
| chr19 | 17959789  | 17983888  | JAK3      | NM_000215    | chr19 | - | 17958842  | 17960842  | 1054 | 8.85979    |
| chr16 | 66866681  | 66881347  | CA7       | NM_005182    | chr16 | + | 66876280  | 66878280  | 2001 | 8.8557875  |
| chr20 | 20691454  | 20694267  | RALGAPA2  | NM_020343    | chr20 | - | 20693267  | 20695267  | 1001 | 8.8522725  |
| chr3  | 47614160  | 47625600  | CSPG5     | NM_006574    | chr3  | - | 47620360  | 47622360  | 2001 | 8.845065   |
| chr1  | 26364575  | 26377768  | SLC30A2   | NM_032513    | chr1  | - | 26372605  | 26374605  | 2001 | 8.838065   |
| chr1  | 22962874  | 23008392  | C1QB      | NM_000491    | chr1  | + | 22977680  | 22979680  | 2001 | 8.82802    |
| chr16 | 4409772   | 4437890   | VASN      | NM_138440    | chr16 | + | 4419847   | 4421847   | 2001 | 8.825895   |
| chr2  | 241761958 | 241840371 | AGXT      | NM_000030    | chr2  | + | 241806160 | 241808160 | 2001 | 8.8235     |
| chr9  | 131636749 | 131653228 | CCBL1     | NM_004059    | chr9  | - | 131644355 | 131646355 | 2001 | 8.822245   |
| chr2  | 95650802  | 95693459  | MAL       | NM_022440    | chr2  | + | 95689477  | 95691477  | 2001 | 8.81826125 |
| chr22 | 46994248  | 47030366  | GRAMD4    | NM_015124    | chr22 | + | 47020656  | 47022656  | 2001 | 8.8177     |
| chr19 | 11030431  | 11063744  | C19orf52  | NM_138358    | chr19 | + | 11037422  | 11039422  | 2001 | 8.81344    |
| chr22 | 19692613  | 19729886  | GP1BB     | NM_000407    | chr22 | + | 19709064  | 19711064  | 2001 | 8.813195   |
| chr18 | 77609582  | 77736239  | KCNG2     | NM_012283    | chr18 | + | 77621666  | 77623666  | 2001 | 8.811065   |
| chr14 | 105012279 | 105067500 | C14orf180 | NM_001008404 | chr14 | + | 105044054 | 105046054 | 2001 | 8.807305   |
| chrX  | 70361244  | 70393377  | NLGN3     | NM_181303    | chrX  | + | 70362679  | 70364679  | 2001 | 8.80304    |
| chr17 | 48158991  | 48190452  | PDK2      | NM_002611    | chr17 | + | 48170694  | 48172694  | 2001 | 8.800255   |
| chr5  | 176857606 | 176893119 | PRR7      | NM_030567    | chr5  | + | 176871794 | 176873794 | 2001 | 8.79258    |
| chr19 | 43841994  | 43865209  | CD177     | NM_020406    | chr19 | + | 43855823  | 43857823  | 2001 | 8.78392    |
| chr19 | 54638567  | 54678454  | LENG1     | NM_024316    | chr19 | - | 54663447  | 54665447  | 2001 | 8.778715   |
| chr11 | 57005134  | 57011182  | APLNR     | NM_005161    | chr11 | - | 57004928  | 57006928  | 1795 | 8.777      |
| chr1  | 209982970 | 209999482 | C1orf107  | NM_014388    | chr1  | + | 209999310 | 210001310 | 173  | 8.773765   |
| chr8  | 144876537 | 144921747 | SCRIB     | NM_182706    | chr8  | - | 144897550 | 144899550 | 2001 | 8.7638525  |

|       |           |           |          |              |       |   |           |           |      |          |
|-------|-----------|-----------|----------|--------------|-------|---|-----------|-----------|------|----------|
| chr19 | 3949450   | 3979388   | DAPK3    | NM_001348    | chr19 | - | 3969827   | 3971827   | 2001 | 8.75364  |
| chr7  | 99058290  | 99082974  | ZNF789   | NM_213603    | chr7  | + | 99068513  | 99070513  | 2001 | 8.74977  |
| chr3  | 125880351 | 125900436 | ALDH1L1  | NM_012190    | chr3  | - | 125899486 | 125901486 | 951  | 8.74926  |
| chr21 | 42718063  | 42753919  | MX2      | NM_002463    | chr21 | + | 42731948  | 42733948  | 2001 | 8.74797  |
| chr1  | 1381962   | 1396389   | ATAD3C   | NM_001039211 | chr1  | + | 1383067   | 1385067   | 2001 | 8.729205 |
| chr3  | 129220001 | 129304339 | H1FOO    | NM_153833    | chr3  | + | 129260055 | 129262055 | 2001 | 8.716365 |
| chr10 | 103891621 | 103896893 | PPRC1    | NM_015062    | chr10 | + | 103890785 | 103892785 | 1165 | 8.71199  |
| chr7  | 121938749 | 121955338 | FEZF1    | NM_001160264 | chr7  | - | 121944566 | 121946566 | 2001 | 8.711925 |
| chr19 | 51476183  | 51644831  | KLK9     | NM_012315    | chr19 | - | 51512891  | 51514891  | 2001 | 8.706975 |
| chr17 | 7727059   | 7785278   | LSMD1    | NM_032356    | chr17 | - | 7761173   | 7763173   | 2001 | 8.70626  |
| chr22 | 24114075  | 24122591  | MMP11    | NM_005940    | chr22 | + | 24113034  | 24115034  | 960  | 8.7051   |
| chr22 | 38438792  | 38481490  | SLC16A8  | NM_013356    | chr22 | - | 38479171  | 38481171  | 2001 | 8.70483  |
| chr7  | 80549454  | 80559249  | SEMA3C   | NM_006379    | chr7  | - | 80548668  | 80550668  | 1215 | 8.684305 |
| chrX  | 101380004 | 101382060 | TCEAL2   | NM_080390    | chrX  | + | 101378658 | 101380658 | 655  | 8.682865 |
| chr10 | 71880535  | 71904710  | AIFM2    | NM_032797    | chr10 | - | 71892691  | 71894691  | 2001 | 8.681035 |
| chr17 | 78468342  | 78522640  | RPTOR    | NM_020761    | chr17 | + | 78516623  | 78518623  | 2001 | 8.67433  |
| chr22 | 37866417  | 37904078  | MFNG     | NM_002405    | chr22 | - | 37882479  | 37884479  | 2001 | 8.66088  |
| chr9  | 71932083  | 71946767  | FAM189A2 | NM_004816    | chr9  | + | 71942239  | 71944239  | 2001 | 8.650395 |
| chr4  | 2247481   | 2269573   | MXD4     | NM_006454    | chr4  | - | 2263740   | 2265740   | 2001 | 8.644575 |
| chr2  | 220092676 | 220117258 | GLB1L    | NM_024506    | chr2  | - | 220110132 | 220112132 | 2001 | 8.644075 |
| chrX  | 25026879  | 25050234  | ARX      | NM_139058    | chrX  | - | 25034066  | 25036066  | 2001 | 8.64181  |
| chr1  | 22962874  | 23008392  | C1QC     | NM_172369    | chr1  | + | 22968116  | 22970116  | 2001 | 8.63913  |
| chr8  | 144312914 | 144353496 | ZFP41    | NM_173832    | chr8  | + | 144327107 | 144329107 | 2001 | 8.63671  |
| chr21 | 45643202  | 45678742  | ICOSLG   | NM_015259    | chr21 | - | 45660835  | 45662835  | 2001 | 8.6299   |

|       |           |           |          |              |       |   |           |           |      |             |
|-------|-----------|-----------|----------|--------------|-------|---|-----------|-----------|------|-------------|
| chr2  | 220373343 | 220381432 | ACCN4    | NM_182847    | chr2  | + | 220376890 | 220378890 | 2001 | 8.62897     |
| chr22 | 18466863  | 18521485  | MICAL3   | NM_015241    | chr22 | - | 18507326  | 18509326  | 2001 | 8.62641     |
| chr2  | 119913277 | 119937112 | C1QL2    | NM_182528    | chr2  | - | 119916472 | 119918472 | 2001 | 8.614215    |
| chr11 | 67400752  | 67442544  | TBX10    | NM_005995    | chr11 | - | 67407032  | 67409032  | 2001 | 8.60818     |
| chr11 | 64070818  | 64089422  | ESRRA    | NM_004451    | chr11 | + | 64071042  | 64073042  | 2001 | 8.59151     |
| chr19 | 33549226  | 33563071  | RHPN2    | NM_033103    | chr19 | - | 33555825  | 33557825  | 2001 | 8.590285    |
| chr6  | 159067484 | 159107731 | SYTL3    | NM_001009991 | chr6  | + | 159069044 | 159071044 | 2001 | 8.58582     |
| chr6  | 33982986  | 34125380  | GRM4     | NM_000841    | chr6  | - | 34101444  | 34103444  | 2001 | 8.58328     |
| chr5  | 175066288 | 175109006 | HRH2     | NM_022304    | chr5  | + | 175106462 | 175108462 | 2001 | 8.577695    |
| chr1  | 3518344   | 3571185   | MEGF6    | NM_001409    | chr1  | - | 3528060   | 3530060   | 2001 | 8.574635    |
| chr22 | 23481158  | 23501967  | RAB36    | NM_004914    | chr22 | + | 23485511  | 23487511  | 2001 | 8.572045    |
| chr11 | 61490076  | 61526210  | C11orf9  | NM_013279    | chr11 | + | 61520859  | 61522859  | 2001 | 8.56913     |
| chr5  | 601557    | 641831    | CEP72    | NM_018140    | chr5  | + | 610403    | 612403    | 2001 | 8.55907     |
| chr14 | 70343629  | 70384333  | SMOC1    | NM_022137    | chr14 | + | 70344141  | 70346141  | 2001 | 8.55488     |
| chr1  | 153315567 | 153359389 | PGLYRP4  | NM_020393    | chr1  | - | 153321023 | 153323023 | 2001 | 8.54788     |
| chr19 | 46313576  | 46332432  | RSPH6A   | NM_030785    | chr19 | - | 46318606  | 46320606  | 2001 | 8.54616     |
| chr22 | 24296477  | 24320634  | GSTT2    | NM_000854    | chr22 | + | 24320312  | 24322312  | 323  | 8.54297     |
| chr12 | 57966563  | 58022490  | DTX3     | NM_178502    | chr12 | + | 57996602  | 57998602  | 2001 | 8.526685    |
| chr1  | 36891604  | 36942685  | OSCP1    | NM_206837    | chr1  | - | 36916087  | 36918087  | 2001 | 8.5205325   |
| chr16 | 78130357  | 78139770  | WWOX     | NM_130844    | chr16 | + | 78131549  | 78133549  | 2001 | 8.520208333 |
| chr16 | 2560914   | 2578176   | AMDHD2   | NM_015944    | chr16 | + | 2568361   | 2570361   | 2001 | 8.51973     |
| chr8  | 139921939 | 139951696 | COL22A1  | NM_152888    | chr8  | - | 139926237 | 139928237 | 2001 | 8.5186      |
| chr1  | 47874109  | 47911088  | FOXD2    | NM_004474    | chr1  | + | 47899687  | 47901687  | 2001 | 8.500285    |
| chr19 | 5666968   | 5715071   | HSD11B1L | NM_198708    | chr19 | + | 5679073   | 5681073   | 2001 | 8.498825    |



|       |           |           |                   |              |       |   |           |           |      |             |
|-------|-----------|-----------|-------------------|--------------|-------|---|-----------|-----------|------|-------------|
| chr10 | 27530265  | 27546440  | ACBD5             | NM_145698    | chr10 | - | 27529809  | 27531809  | 1545 | 8.4988      |
| chr10 | 135168330 | 135180514 | C10orf125         | NM_198472    | chr10 | - | 135171530 | 135173530 | 2001 | 8.493205    |
| chr3  | 133462145 | 133476489 | TF                | NM_001063    | chr3  | + | 133462975 | 133464975 | 2001 | 8.49028     |
| chr1  | 228590312 | 228618255 | TRIM17            | NM_016102    | chr1  | - | 228604584 | 228606584 | 2001 | 8.48259     |
| chr8  | 10698992  | 10713048  | PINX1             | NM_017884    | chr8  | - | 10697300  | 10699300  | 309  | 8.47939     |
| chr22 | 19692613  | 19729886  | SEPT5             | NM_002688    | chr22 | + | 19699985  | 19701985  | 2001 | 8.475805    |
| chr10 | 76839632  | 76864891  | DUSP13            | NM_016364    | chr10 | - | 76859249  | 76861249  | 2001 | 8.471675833 |
| chr5  | 159329820 | 159345444 | ADRA1B            | NM_000679    | chr5  | + | 159341738 | 159343738 | 2001 | 8.468355    |
| chr15 | 42094340  | 42157010  | JMJD7-<br>PLA2G4B | NM_005090    | chr15 | + | 42118281  | 42120281  | 2001 | 8.462465    |
| chr7  | 158310509 | 158385672 | PTPRN2            | NM_130843    | chr7  | - | 158380483 | 158382483 | 2001 | 8.4529      |
| chr21 | 47555426  | 47577670  | FTCD              | NM_206965    | chr21 | - | 47575482  | 47577482  | 2001 | 8.450505    |
| chr7  | 150688033 | 150699464 | NOS3              | NM_001160111 | chr7  | + | 150688890 | 150690890 | 2001 | 8.4478      |
| chr2  | 241559552 | 241567995 | GPR35             | NM_005301    | chr2  | + | 241562660 | 241564660 | 2001 | 8.445655    |
| chr14 | 77219742  | 77240896  | VASH1             | NM_014909    | chr14 | + | 77226233  | 77228233  | 2001 | 8.44256     |
| chr15 | 65359762  | 65371768  | KBTBD13           | NM_001101362 | chr15 | + | 65367152  | 65369152  | 2001 | 8.437845    |
| chr22 | 45796009  | 45838121  | RIBC2             | NM_015653    | chr22 | + | 45807572  | 45809572  | 2001 | 8.433865    |
| chr1  | 153924325 | 153940770 | CREB3L4           | NM_130898    | chr1  | + | 153938395 | 153940395 | 2001 | 8.42809     |
| chr2  | 37179857  | 37194856  | STRN              | NM_003162    | chr2  | - | 37193616  | 37195616  | 1241 | 8.423515    |
| chr11 | 8097528   | 8117230   | TUB               | NM_177972    | chr11 | + | 8100907   | 8102907   | 2001 | 8.419725    |
| chr11 | 2182173   | 2237853   | TH                | NM_199293    | chr11 | - | 2193036   | 2195036   | 2001 | 8.41451     |
| chr4  | 25610280  | 25679061  | SLC34A2           | NM_006424    | chr4  | + | 25655433  | 25657433  | 2001 | 8.413985    |
| chr1  | 153315567 | 153359389 | S100A12           | NM_005621    | chr1  | - | 153348076 | 153350076 | 2001 | 8.409455    |
| chr10 | 1100684   | 1117258   | WDR37             | NM_014023    | chr10 | + | 1100774   | 1102774   | 2001 | 8.401475    |
| chr12 | 52436762  | 52453608  | NR4A1             | NM_173157    | chr12 | + | 52443189  | 52445189  | 2001 | 8.3983775   |

|       |           |           |          |              |       |   |           |           |      |            |
|-------|-----------|-----------|----------|--------------|-------|---|-----------|-----------|------|------------|
| chr11 | 76774477  | 76804942  | CAPN5    | NM_004055    | chr11 | + | 76775990  | 76777990  | 2001 | 8.398085   |
| chr7  | 971088    | 1005691   | ADAP1    | NM_006869    | chr7  | - | 994290    | 996290    | 2001 | 8.38983    |
| chr11 | 589521    | 623612    | IRF7     | NM_004031    | chr11 | - | 615729    | 617729    | 2001 | 8.38112875 |
| chr11 | 109952300 | 109966633 | ZC3H12C  | NM_033390    | chr11 | + | 109962085 | 109964085 | 2001 | 8.377045   |
| chr20 | 32238904  | 32272116  | NECAB3   | NM_031232    | chr20 | - | 32262265  | 32264265  | 2001 | 8.3764475  |
| chr1  | 151690417 | 151712803 | CELF3    | NM_007185    | chr1  | - | 151689291 | 151691291 | 875  | 8.374095   |
| chr11 | 129683200 | 129701443 | TMEM45B  | NM_138788    | chr11 | + | 129683739 | 129685739 | 2001 | 8.36271    |
| chr21 | 43788321  | 43797183  | TFF1     | NM_003225    | chr21 | - | 43786645  | 43788645  | 325  | 8.36256    |
| chr3  | 183952701 | 183973845 | ECE2     | NM_032331    | chr3  | + | 183965443 | 183967443 | 2001 | 8.361835   |
| chr11 | 128757867 | 128825914 | C11orf45 | NM_145013    | chr11 | - | 128775593 | 128777593 | 2001 | 8.359555   |
| chr22 | 44664575  | 44733134  | KIAA1644 | NM_001099294 | chr22 | - | 44708732  | 44710732  | 2001 | 8.35696    |
| chr22 | 23481158  | 23501967  | RTDR1    | NM_014433    | chr22 | - | 23484242  | 23486242  | 2001 | 8.35411    |
| chr3  | 193262291 | 193303675 | ATP13A4  | NM_032279    | chr3  | - | 193272697 | 193274697 | 2001 | 8.3504     |
| chr4  | 7190100   | 7326426   | SORCS2   | NM_020777    | chr4  | + | 7192372   | 7194372   | 2001 | 8.3295     |
| chr12 | 52820870  | 52887480  | KRT75    | NM_004693    | chr12 | - | 52828111  | 52830111  | 2001 | 8.32483    |
| chr19 | 51476183  | 51644831  | SIGLEC9  | NM_014441    | chr19 | + | 51626135  | 51628135  | 2001 | 8.313835   |
| chr19 | 45653031  | 45706144  | BLOC1S3  | NM_212550    | chr19 | + | 45680001  | 45682001  | 2001 | 8.30797    |
| chr8  | 133686621 | 133716108 | LRRC6    | NM_012472    | chr8  | - | 133687814 | 133689814 | 2001 | 8.30471    |
| chr12 | 130385791 | 130390171 | TMEM132D | NM_133448    | chr12 | - | 130388213 | 130390213 | 1959 | 8.29868    |
| chr22 | 37421494  | 37554170  | KCTD17   | NM_024681    | chr22 | + | 37445777  | 37447777  | 2001 | 8.288775   |
| chr11 | 117945426 | 118039781 | SCN4B    | NM_174934    | chr11 | - | 118023631 | 118025631 | 2001 | 8.28205    |
| chr19 | 40729614  | 40767628  | CNTD2    | NM_024877    | chr19 | - | 40732598  | 40734598  | 2001 | 8.28171    |
| chr9  | 139956910 | 139979454 | C9orf140 | NM_178448    | chr9  | - | 139965029 | 139967029 | 2001 | 8.281635   |
| chr11 | 65386776  | 65417325  | SIPA1    | NM_153253    | chr11 | + | 65405590  | 65407590  | 2001 | 8.28138    |

|       |           |           |           |              |       |   |           |           |      |             |
|-------|-----------|-----------|-----------|--------------|-------|---|-----------|-----------|------|-------------|
| chr17 | 43854755  | 43869909  | CRHR1     | NM_004382    | chr17 | + | 43859644  | 43861644  | 2001 | 8.279485    |
| chr13 | 113736009 | 113820307 | PROZ      | NM_003891    | chr13 | + | 113810966 | 113812966 | 2001 | 8.27603     |
| chr19 | 3779442   | 3794868   | MATK      | NM_139355    | chr19 | - | 3786416   | 3788416   | 2001 | 8.272545    |
| chr2  | 198164888 | 198176740 | ANKRD44   | NM_153697    | chr2  | - | 198175522 | 198177522 | 1219 | 8.263315    |
| chr7  | 3312343   | 3349023   | SDK1      | NM_152744    | chr7  | + | 3339078   | 3341078   | 2001 | 8.26259     |
| chr2  | 119598885 | 119617110 | EN1       | NM_001426    | chr2  | - | 119605760 | 119607760 | 2001 | 8.258805    |
| chr4  | 7029327   | 7049691   | CCDC96    | NM_153376    | chr4  | - | 7044729   | 7046729   | 2001 | 8.256625    |
| chr3  | 190213667 | 190261768 | IL1RAP    | NM_134470    | chr3  | + | 190229838 | 190231838 | 2001 | 8.244805    |
| chr3  | 24513813  | 24539132  | THRB      | NM_001128177 | chr3  | - | 24536314  | 24538314  | 2001 | 8.23743     |
| chr21 | 46345336  | 46398926  | ITGB2     | NM_001127491 | chr21 | - | 46348754  | 46350754  | 2001 | 8.232095    |
| chr1  | 22863658  | 22941004  | EPHA8     | NM_020526    | chr1  | + | 22888002  | 22890002  | 2001 | 8.2257225   |
| chr1  | 210472911 | 210538088 | HHAT      | NM_018194    | chr1  | + | 210500248 | 210502248 | 2001 | 8.2178      |
| chr12 | 115109611 | 115139187 | TBX3      | NM_016569    | chr12 | - | 115121970 | 115123970 | 2001 | 8.21399     |
| chr11 | 118842272 | 118859448 | FOXR1     | NM_181721    | chr11 | + | 118840415 | 118842415 | 144  | 8.192925    |
| chr22 | 38829711  | 38866797  | KCNJ4     | NM_152868    | chr22 | - | 38851204  | 38853204  | 2001 | 8.18948     |
| chr2  | 95939604  | 95974537  | KCNIP3    | NM_013434    | chr2  | + | 95961070  | 95963070  | 2001 | 8.173275    |
| chr2  | 172965785 | 172993475 | DLX2      | NM_004405    | chr2  | - | 172967479 | 172969479 | 2001 | 8.16643     |
| chr1  | 97168877  | 97186390  | PTBP2     | NM_021190    | chr1  | + | 97185173  | 97187173  | 1218 | 8.15184     |
| chr19 | 7675216   | 7711628   | PCP2      | NM_174895    | chr19 | - | 7698571   | 7700571   | 2001 | 8.15058     |
| chr20 | 32238904  | 32272116  | C20orf144 | NM_080825    | chr20 | + | 32248118  | 32250118  | 2001 | 8.14937     |
| chr5  | 168725303 | 168728897 | SLIT3     | NM_003062    | chr5  | - | 168728134 | 168730134 | 764  | 8.148505    |
| chr3  | 46720057  | 46744132  | TMIE      | NM_147196    | chr3  | + | 46740821  | 46742821  | 2001 | 8.146535    |
| chr1  | 110751840 | 110789139 | KCNC4     | NM_004978    | chr1  | + | 110751334 | 110753334 | 1495 | 8.139988333 |
| chr19 | 47973805  | 48015833  | KPTN      | NM_007059    | chr19 | - | 47987522  | 47989522  | 2001 | 8.12577     |

|       |           |           |           |              |       |   |           |           |      |             |
|-------|-----------|-----------|-----------|--------------|-------|---|-----------|-----------|------|-------------|
| chr8  | 144312914 | 144353496 | GLI4      | NM_138465    | chr8  | + | 144347605 | 144349605 | 2001 | 8.124615    |
| chr19 | 51476183  | 51644831  | CTU1      | NM_145232    | chr19 | - | 51611648  | 51613648  | 2001 | 8.122485    |
| chr1  | 11915614  | 11943992  | NPPB      | NM_002521    | chr1  | - | 11918993  | 11920993  | 2001 | 8.111615    |
| chrX  | 55490124  | 55544519  | USP51     | NM_201286    | chrX  | - | 55515632  | 55517632  | 2001 | 8.1052      |
| chr7  | 44156290  | 44202820  | MYL7      | NM_021223    | chr7  | - | 44180917  | 44182917  | 2001 | 8.10018     |
| chr7  | 150068516 | 150079578 | ZNF775    | NM_173680    | chr7  | + | 150074404 | 150076404 | 2001 | 8.09935     |
| chr17 | 79168798  | 79232173  | C17orf89  | NM_001086521 | chr17 | + | 79211109  | 79213109  | 2001 | 8.09919     |
| chr11 | 68739025  | 68761357  | MRGPRD    | NM_198923    | chr11 | - | 68748456  | 68750456  | 2001 | 8.09518     |
| chr19 | 45485843  | 45511834  | RELB      | NM_006509    | chr19 | + | 45502710  | 45504710  | 2001 | 8.086915    |
| chr17 | 79168798  | 79232173  | AZI1      | NM_014984    | chr17 | - | 79196752  | 79198752  | 2001 | 8.08385     |
| chr12 | 41084207  | 41092079  | CNTN1     | NM_175038    | chr12 | + | 41084356  | 41086356  | 2001 | 8.073015    |
| chrX  | 149006439 | 149014100 | MAGEA8    | NM_005364    | chrX  | + | 149007939 | 149009939 | 2001 | 8.06859     |
| chr22 | 37421494  | 37554170  | TMPRSS6   | NM_153609    | chr22 | - | 37499694  | 37501694  | 2001 | 8.064615    |
| chr19 | 2080611   | 2101935   | IZUMO4    | NM_001039846 | chr19 | + | 2094866   | 2096866   | 2001 | 8.061198333 |
| chr11 | 773095    | 802283    | PDDC1     | NM_182612    | chr11 | - | 777488    | 779488    | 2001 | 8.056505    |
| chr2  | 241064061 | 241105020 | OTOS      | NM_148961    | chr2  | - | 241080074 | 241082074 | 2001 | 8.053       |
| chr13 | 113736009 | 113820307 | F10       | NM_000504    | chr13 | + | 113775111 | 113777111 | 2001 | 8.04868     |
| chr16 | 8688126   | 8714681   | C16orf68  | NM_024109    | chr16 | + | 8713525   | 8715525   | 1157 | 8.04464     |
| chr11 | 71266661  | 71282055  | KRTAP5-10 | NM_001012710 | chr11 | + | 71274607  | 71276607  | 2001 | 8.032145    |
| chr22 | 30768424  | 30839322  | RNF215    | NM_001017981 | chr22 | - | 30783303  | 30785303  | 2001 | 8.028445    |
| chr1  | 200628316 | 200653557 | DDX59     | NM_001031725 | chr1  | - | 200639127 | 200641127 | 2001 | 8.0252425   |
| chr2  | 19551953  | 19559806  | OSR1      | NM_145260    | chr2  | - | 19558373  | 19560373  | 1434 | 8.01595     |
| chr11 | 111371287 | 111409893 | C11orf88  | NM_207430    | chr11 | + | 111383508 | 111385508 | 2001 | 8.01078     |
| chr6  | 29643346  | 29650049  | ZFP57     | NM_001109809 | chr6  | - | 29644932  | 29646932  | 2001 | 8.006545    |

|       |           |           |          |              |       |   |           |           |      |             |
|-------|-----------|-----------|----------|--------------|-------|---|-----------|-----------|------|-------------|
| chr5  | 2742165   | 2758620   | C5orf38  | NM_178569    | chr5  | + | 2750260   | 2752260   | 2001 | 7.99812     |
| chr9  | 136179690 | 136232109 | SURF6    | NM_006753    | chr9  | - | 136203048 | 136205048 | 2001 | 7.98224     |
| chr22 | 50644124  | 50705002  | TUBGCP6  | NM_020461    | chr22 | - | 50683401  | 50685401  | 2001 | 7.9674      |
| chr7  | 44089227  | 44115184  | PGAM2    | NM_000290    | chr7  | - | 44105187  | 44107187  | 2001 | 7.957205    |
| chr11 | 117799563 | 117812364 | TMPRSS13 | NM_001077263 | chr11 | - | 117800116 | 117802116 | 2001 | 7.95108     |
| chr17 | 34066013  | 34095416  | GAS2L2   | NM_139285    | chr17 | - | 34079898  | 34081898  | 2001 | 7.94571     |
| chr1  | 20447962  | 20493895  | PLA2G2F  | NM_022819    | chr1  | + | 20463821  | 20465821  | 2001 | 7.93739     |
| chr3  | 128161932 | 128189778 | DNAJB8   | NM_153330    | chr3  | - | 128186092 | 128188092 | 2001 | 7.931205    |
| chr19 | 451428    | 466666    | SHC2     | NM_012435    | chr19 | - | 460997    | 462997    | 2001 | 7.92482     |
| chr11 | 2277729   | 2350869   | ASCL2    | NM_005170    | chr11 | - | 2292183   | 2294183   | 2001 | 7.921445    |
| chr19 | 1475913   | 1511153   | PCSK4    | NM_017573    | chr19 | - | 1490408   | 1492408   | 2001 | 7.919935    |
| chr8  | 143859675 | 143883023 | LYNX1    | NM_177477    | chr8  | - | 143858745 | 143860745 | 1071 | 7.91934     |
| chr19 | 46384392  | 46423983  | IRF2BP1  | NM_015649    | chr19 | - | 46389377  | 46391377  | 2001 | 7.91711     |
| chr15 | 57880548  | 57889410  | GCOM1    | NM_152451    | chr15 | + | 57882100  | 57884100  | 2001 | 7.909093333 |
| chr6  | 31887797  | 31903708  | C2       | NM_001145903 | chr6  | + | 31893264  | 31895264  | 2001 | 7.903445    |
| chr20 | 3002214   | 3030616   | GNRH2    | NM_178332    | chr20 | + | 3022266   | 3024266   | 2001 | 7.89831     |
| chr16 | 67956715  | 67978912  | CTRL     | NM_001907    | chr16 | - | 67965779  | 67967779  | 2001 | 7.89307     |
| chr9  | 139746296 | 139757013 | MAMDC4   | NM_206920    | chr9  | + | 139744817 | 139746817 | 522  | 7.882945    |
| chr1  | 41318875  | 41365607  | CITED4   | NM_133467    | chr1  | - | 41328019  | 41330019  | 2001 | 7.88114     |
| chr14 | 100780278 | 100797994 | SLC25A47 | NM_207117    | chr14 | + | 100787677 | 100789677 | 2001 | 7.87916     |
| chr17 | 39504325  | 39521117  | KRT33A   | NM_004138    | chr17 | - | 39507057  | 39509057  | 2001 | 7.876315    |
| chr6  | 48029467  | 48046188  | C6orf138 | NM_207499    | chr6  | - | 48036426  | 48038426  | 2001 | 7.875975    |
| chr6  | 31686023  | 31698854  | C6orf25  | NM_138277    | chr6  | + | 31689159  | 31691159  | 2001 | 7.871735    |
| chr9  | 139808714 | 139847309 | LCN12    | NM_178536    | chr9  | + | 139844766 | 139846766 | 2001 | 7.864875    |

|       |           |           |           |              |       |   |           |           |      |           |
|-------|-----------|-----------|-----------|--------------|-------|---|-----------|-----------|------|-----------|
| chr4  | 983594    | 1011181   | SLC26A1   | NM_213613    | chr4  | - | 987225    | 989225    | 2001 | 7.861335  |
| chr11 | 773095    | 802283    | CEND1     | NM_016564    | chr11 | - | 790127    | 792127    | 2001 | 7.85686   |
| chr1  | 11086267  | 11117160  | MASP2     | NM_139208    | chr1  | - | 11107286  | 11109286  | 2001 | 7.854955  |
| chr22 | 30087931  | 30147490  | CABP7     | NM_182527    | chr22 | + | 30114342  | 30116342  | 2001 | 7.84997   |
| chr16 | 52579249  | 52586955  | TOX3      | NM_001146188 | chr16 | - | 52581715  | 52583715  | 2001 | 7.84675   |
| chr3  | 50559403  | 50608885  | C3orf18   | NM_016210    | chr3  | - | 50605224  | 50607224  | 2001 | 7.84443   |
| chr22 | 32420828  | 32441214  | SLC5A1    | NM_000343    | chr22 | + | 32437017  | 32439017  | 2001 | 7.84092   |
| chr12 | 54352252  | 54384109  | HOXC10    | NM_017409    | chr12 | + | 54376944  | 54378944  | 2001 | 7.836765  |
| chr8  | 142515492 | 142539350 | FLJ43860  | NM_207414    | chr8  | - | 142517331 | 142519331 | 2001 | 7.83669   |
| chr2  | 233263479 | 233322929 | ALPPL2    | NM_031313    | chr2  | + | 233269550 | 233271550 | 2001 | 7.836135  |
| chr17 | 33457083  | 33487283  | NLE1      | NM_018096    | chr17 | - | 33469323  | 33471323  | 2001 | 7.832325  |
| chr15 | 79089873  | 79107462  | ADAMTS7   | NM_014272    | chr15 | - | 79103774  | 79105774  | 2001 | 7.83171   |
| chr6  | 168417468 | 168535217 | KIF25     | NM_030615    | chr6  | + | 168416551 | 168418551 | 1084 | 7.8255825 |
| chr15 | 40627378  | 40652635  | DISP2     | NM_033510    | chr15 | + | 40648432  | 40650432  | 2001 | 7.81942   |
| chr1  | 152538994 | 152555552 | LCE3D     | NM_032563    | chr1  | - | 152552981 | 152554981 | 2001 | 7.81877   |
| chr20 | 25040795  | 25066437  | ACSS1     | NM_032501    | chr20 | - | 25039617  | 25041617  | 823  | 7.81728   |
| chr17 | 17375960  | 17418738  | RASD1     | NM_016084    | chr17 | - | 17399708  | 17401708  | 2001 | 7.816995  |
| chr14 | 91274910  | 91299657  | TTC7B     | NM_001010854 | chr14 | - | 91282762  | 91284762  | 2001 | 7.80535   |
| chrX  | 152940672 | 152970048 | PNCK      | NM_001135740 | chrX  | - | 152938744 | 152940744 | 73   | 7.797065  |
| chr19 | 42473429  | 42521539  | ATP1A3    | NM_152296    | chr19 | - | 42498383  | 42500383  | 2001 | 7.79552   |
| chr8  | 146015609 | 146031861 | ZNF517    | NM_213605    | chr8  | + | 146022259 | 146024259 | 2001 | 7.7914    |
| chr22 | 30939215  | 30980664  | GAL3ST1   | NM_004861    | chr22 | - | 30960877  | 30962877  | 2001 | 7.783685  |
| chr17 | 5021528   | 5030702   | ZNF232    | NM_014519    | chr17 | - | 5026398   | 5028398   | 2001 | 7.78283   |
| chr20 | 32238904  | 32272116  | C20orf134 | NM_001024675 | chr20 | + | 32252302  | 32254302  | 2001 | 7.77939   |

|       |           |           |           |              |       |   |           |           |      |             |
|-------|-----------|-----------|-----------|--------------|-------|---|-----------|-----------|------|-------------|
| chr16 | 89144591  | 89225181  | ACSF3     | NM_174917    | chr16 | + | 89158252  | 89160252  | 2001 | 7.777265    |
| chr12 | 50299469  | 50331845  | FAIM2     | NM_012306    | chr12 | - | 50297721  | 50299721  | 253  | 7.76415     |
| chr7  | 128468762 | 128561570 | FLNC      | NM_001458    | chr7  | + | 128468481 | 128470481 | 1720 | 7.76409     |
| chrX  | 53057968  | 53086131  | GPR173    | NM_018969    | chrX  | + | 53076504  | 53078504  | 2001 | 7.761595    |
| chr1  | 205532998 | 205565332 | MFSD4     | NM_181644    | chr1  | + | 205536110 | 205538110 | 2001 | 7.760385    |
| chr3  | 62354626  | 62364945  | FEZF2     | NM_018008    | chr3  | - | 62359191  | 62361191  | 2001 | 7.73766     |
| chr13 | 114263532 | 114324165 | GRK1      | NM_002929    | chr13 | + | 114319595 | 114321595 | 2001 | 7.734705    |
| chr8  | 27317381  | 27341105  | CHRNA2    | NM_000742    | chr8  | - | 27336814  | 27338814  | 2001 | 7.733065    |
| chr12 | 111466852 | 111506572 | CUX2      | NM_015267    | chr12 | + | 111469826 | 111471826 | 2001 | 7.731315    |
| chr19 | 8209308   | 8216939   | FBN3      | NM_032447    | chr19 | - | 8212386   | 8214386   | 2001 | 7.727395    |
| chr10 | 5522208   | 5572766   | CALML5    | NM_017422    | chr10 | - | 5541534   | 5543534   | 2001 | 7.72422     |
| chr10 | 134881052 | 134953434 | GPR123    | NM_001083909 | chr10 | + | 134899407 | 134901407 | 2001 | 7.722235    |
| chr22 | 19835827  | 19861467  | GNB1L     | NM_053004    | chr22 | - | 19842463  | 19844463  | 2001 | 7.7215      |
| chr2  | 233725790 | 233758852 | C2orf82   | NM_206895    | chr2  | + | 233732992 | 233734992 | 2001 | 7.702705    |
| chr11 | 63857541  | 63873200  | FLRT1     | NM_013280    | chr11 | + | 63869360  | 63871360  | 2001 | 7.69978     |
| chr21 | 46016366  | 46036924  | KRTAP10-8 | NM_198695    | chr21 | + | 46029994  | 46031994  | 2001 | 7.695405    |
| chr3  | 69420090  | 69439316  | FRMD4B    | NM_015123    | chr3  | - | 69435431  | 69437431  | 2001 | 7.6834      |
| chr11 | 26341550  | 26355813  | ANO3      | NM_031418    | chr11 | + | 26351676  | 26353676  | 2001 | 7.681045    |
| chr19 | 5783305   | 5788545   | PRR22     | NM_001134316 | chr19 | - | 5784777   | 5786777   | 2001 | 7.67891     |
| chr1  | 11494807  | 11555865  | PTCHD2    | NM_020780    | chr1  | + | 11537293  | 11539293  | 2001 | 7.677995    |
| chr5  | 131394814 | 131425363 | CSF2      | NM_000758    | chr5  | + | 131407483 | 131409483 | 2001 | 7.676825    |
| chr4  | 8579768   | 8620296   | GPR78     | NM_080819    | chr4  | + | 8580289   | 8582289   | 2001 | 7.674655    |
| chr8  | 144575780 | 144645387 | ZC3H3     | NM_015117    | chr8  | - | 144623621 | 144625621 | 2001 | 7.67242     |
| chr2  | 121512775 | 121655675 | GLI2      | NM_005270    | chr2  | + | 121552865 | 121554865 | 2001 | 7.666026667 |

|       |           |           |          |              |       |   |           |           |      |          |
|-------|-----------|-----------|----------|--------------|-------|---|-----------|-----------|------|----------|
| chr1  | 53653867  | 53667192  | CPT2     | NM_000098    | chr1  | + | 53660099  | 53662099  | 2001 | 7.665245 |
| chr11 | 119281318 | 119298354 | THY1     | NM_006288    | chr11 | - | 119294247 | 119296247 | 2001 | 7.662365 |
| chr19 | 3477186   | 3496977   | C19orf77 | NM_001136503 | chr19 | - | 3480541   | 3482541   | 2001 | 7.662245 |
| chr5  | 145717106 | 145727271 | POU4F3   | NM_002700    | chr5  | + | 145716585 | 145718585 | 1480 | 7.65146  |
| chrX  | 71513735  | 71532963  | CITED1   | NM_004143    | chrX  | - | 71526838  | 71528838  | 2001 | 7.64387  |
| chr16 | 57559357  | 57575670  | CCDC102A | NM_033212    | chr16 | - | 57570478  | 57572478  | 2001 | 7.632665 |
| chr21 | 45201269  | 45239461  | RRP1     | NM_003683    | chr21 | + | 45207416  | 45209416  | 2001 | 7.632625 |
| chr19 | 49916371  | 49942762  | PTH2     | NM_178449    | chr19 | - | 49926699  | 49928699  | 2001 | 7.632195 |
| chr11 | 60706044  | 60724965  | SLC15A3  | NM_016582    | chr11 | - | 60719258  | 60721258  | 2001 | 7.627235 |
| chr17 | 34066013  | 34095416  | C17orf50 | NM_145272    | chr17 | + | 34085914  | 34087914  | 2001 | 7.61647  |
| chr10 | 118973891 | 118999427 | SLC18A2  | NM_003054    | chr10 | + | 118998582 | 119000582 | 846  | 7.61642  |
| chr17 | 79602642  | 79631371  | TSPAN10  | NM_031945    | chr17 | + | 79607347  | 79609347  | 2001 | 7.6079   |
| chr11 | 295817    | 317285    | IFITM5   | NM_001025295 | chr11 | - | 299527    | 301527    | 2001 | 7.598475 |
| chr13 | 20724392  | 20763536  | GJA3     | NM_021954    | chr13 | - | 20735184  | 20737184  | 2001 | 7.587835 |
| chr8  | 145067338 | 145096214 | SPATC1   | NM_198572    | chr8  | + | 145084580 | 145086580 | 2001 | 7.584095 |
| chr11 | 61093540  | 61117118  | DAK      | NM_015533    | chr11 | + | 61098652  | 61100652  | 2001 | 7.58133  |
| chr1  | 228332351 | 228347110 | GJC2     | NM_020435    | chr1  | + | 228335551 | 228337551 | 2001 | 7.57552  |
| chr9  | 132408535 | 132450097 | PRRX2    | NM_016307    | chr9  | + | 132425918 | 132427918 | 2001 | 7.572175 |
| chr3  | 8766083   | 8785886   | CAV3     | NM_033337    | chr3  | + | 8773484   | 8775484   | 2001 | 7.564715 |
| chr1  | 4683354   | 4729331   | AJAP1    | NM_018836    | chr1  | + | 4713103   | 4715103   | 2001 | 7.56133  |
| chr15 | 67517247  | 67546189  | IQCH     | NM_022784    | chr15 | + | 67545136  | 67547136  | 1054 | 7.553705 |
| chr9  | 101555428 | 101586576 | GALNT12  | NM_024642    | chr9  | + | 101567979 | 101569979 | 2001 | 7.549235 |
| chr11 | 44324941  | 44336263  | ALX4     | NM_021926    | chr11 | - | 44331717  | 44333717  | 2001 | 7.542175 |
| chr11 | 69618005  | 69655696  | FGF3     | NM_005247    | chr11 | - | 69634193  | 69636193  | 2001 | 7.538735 |



|       |           |           |          |              |       |   |           |           |      |             |
|-------|-----------|-----------|----------|--------------|-------|---|-----------|-----------|------|-------------|
| chr2  | 233263479 | 233322929 | ALPI     | NM_001631    | chr2  | + | 233318831 | 233320831 | 2001 | 7.534565    |
| chr1  | 16052620  | 16065018  | SLC25A34 | NM_207348    | chr1  | + | 16060807  | 16062807  | 2001 | 7.51802     |
| chr17 | 7251199   | 7265679   | TMEM95   | NM_198154    | chr17 | + | 7256495   | 7258495   | 2001 | 7.50406     |
| chr14 | 101345976 | 101356331 | RTL1     | NM_001134888 | chr14 | - | 101351185 | 101353185 | 2001 | 7.50318     |
| chr19 | 42653203  | 42753990  | ZNF526   | NM_133444    | chr19 | + | 42722490  | 42724490  | 2001 | 7.502605    |
| chr14 | 77730379  | 77748231  | NGB      | NM_021257    | chr14 | - | 77737656  | 77739656  | 2001 | 7.495675    |
| chr19 | 14636547  | 14674447  | TECR     | NM_138501    | chr19 | + | 14638380  | 14640380  | 2001 | 7.489105    |
| chr10 | 23464098  | 23485743  | PTF1A    | NM_178161    | chr10 | + | 23479458  | 23481458  | 2001 | 7.48868     |
| chr11 | 75135050  | 75153154  | KLHL35   | NM_001039548 | chr11 | - | 75141675  | 75143675  | 2001 | 7.4797      |
| chr17 | 79863562  | 79914497  | MYADML2  | NM_001145113 | chr17 | - | 79905110  | 79907110  | 2001 | 7.476105    |
| chr19 | 45653031  | 45706144  | NKPD1    | NM_198478    | chr19 | - | 45663409  | 45665409  | 2001 | 7.435445    |
| chr22 | 41638652  | 41676630  | CHADL    | NM_138481    | chr22 | - | 41636936  | 41638936  | 285  | 7.42657     |
| chr3  | 50559403  | 50608885  | HEMK1    | NM_016173    | chr3  | + | 50604907  | 50606907  | 2001 | 7.422465    |
| chr9  | 111594370 | 111627510 | ACTL7B   | NM_006686    | chr9  | - | 111618276 | 111620276 | 2001 | 7.41827     |
| chr17 | 3561568   | 3600311   | P2RX5    | NM_175081    | chr17 | - | 3599584   | 3601584   | 728  | 7.417598333 |
| chr1  | 201142334 | 201160615 | IGFN1    | NM_001164586 | chr1  | + | 201157951 | 201159951 | 2001 | 7.413195    |
| chr22 | 44289476  | 44321066  | PNPLA5   | NM_138814    | chr22 | - | 44287894  | 44289894  | 419  | 7.404245    |
| chr1  | 45271266  | 45281304  | TCTEX1D4 | NM_001013632 | chr1  | - | 45272958  | 45274958  | 2001 | 7.4034      |
| chr19 | 42557378  | 42577462  | GRIK5    | NM_002088    | chr19 | - | 42569958  | 42571958  | 2001 | 7.398605    |
| chr1  | 2270604   | 2337047   | MORN1    | NM_024848    | chr1  | - | 2322994   | 2324994   | 2001 | 7.394995    |
| chr22 | 29701245  | 29736193  | RASL10A  | NM_006477    | chr22 | - | 29711749  | 29713749  | 2001 | 7.394805    |
| chr18 | 76805257  | 76831763  | ATP9B    | NM_198531    | chr18 | + | 76827395  | 76829395  | 2001 | 7.39324     |
| chr4  | 55990941  | 56036033  | KDR      | NM_002253    | chr4  | - | 55991763  | 55993763  | 2001 | 7.392115    |
| chr21 | 45841829  | 45877317  | LRRC3    | NM_030891    | chr21 | + | 45873391  | 45875391  | 2001 | 7.38536     |

|       |           |           |           |              |       |   |           |           |      |             |
|-------|-----------|-----------|-----------|--------------|-------|---|-----------|-----------|------|-------------|
| chrX  | 123464918 | 123482329 | SH2D1A    | NM_002351    | chrX  | + | 123478130 | 123480130 | 2001 | 7.364625    |
| chrX  | 77558079  | 77585292  | CYSLTR1   | NM_006639    | chrX  | - | 77583088  | 77585088  | 2001 | 7.35327     |
| chr8  | 11302540  | 11334313  | FAM167A   | NM_053279    | chr8  | - | 11324277  | 11326277  | 2001 | 7.35135     |
| chr3  | 52505202  | 52538963  | STAB1     | NM_015136    | chr3  | + | 52527354  | 52529354  | 2001 | 7.337995    |
| chr17 | 43906614  | 43921217  | IMP5      | NM_175882    | chr17 | + | 43920254  | 43922254  | 964  | 7.324605    |
| chr15 | 33571640  | 33606049  | RYR3      | NM_001036    | chr15 | + | 33601175  | 33603175  | 2001 | 7.32245     |
| chr1  | 37497429  | 37518066  | GRIK3     | NM_000831    | chr1  | - | 37499845  | 37501845  | 2001 | 7.315125    |
| chr1  | 40100149  | 40160008  | NT5C1A    | NM_032526    | chr1  | - | 40137711  | 40139711  | 2001 | 7.312725    |
| chr16 | 28512622  | 28522028  | IL27      | NM_145659    | chr16 | - | 28518156  | 28520156  | 2001 | 7.31263     |
| chr2  | 26783224  | 26798362  | C2orf70   | NM_001105519 | chr2  | + | 26783479  | 26785479  | 2001 | 7.31131     |
| chr1  | 21026101  | 21062620  | KIF17     | NM_020816    | chr1  | - | 21044318  | 21046318  | 2001 | 7.30465     |
| chr7  | 127990720 | 128006807 | PRRT4     | NM_001174164 | chr7  | - | 128001740 | 128003740 | 2001 | 7.304555    |
| chr7  | 150868480 | 150895240 | ASB10     | NM_080871    | chr7  | - | 150884920 | 150886920 | 2001 | 7.29176     |
| chr11 | 75899528  | 75922849  | WNT11     | NM_004626    | chr11 | - | 75917575  | 75919575  | 2001 | 7.29132     |
| chr17 | 21147782  | 21212145  | C17orf103 | NM_152914    | chr17 | - | 21156579  | 21158579  | 2001 | 7.26497     |
| chr17 | 43507639  | 43560969  | SH3D20    | NM_174919    | chr17 | - | 43510283  | 43512283  | 2001 | 7.262325    |
| chr11 | 2277729   | 2350869   | TSPAN32   | NM_139022    | chr11 | + | 2321241   | 2323241   | 2001 | 7.261051667 |
| chr19 | 39970203  | 39995166  | DLL3      | NM_203486    | chr19 | + | 39987555  | 39989555  | 2001 | 7.2577825   |
| chr10 | 43568906  | 43597126  | RET       | NM_020975    | chr10 | + | 43570515  | 43572515  | 2001 | 7.2576525   |
| chr22 | 30654795  | 30698906  | OSM       | NM_020530    | chr22 | - | 30662841  | 30664841  | 2001 | 7.23887     |
| chr8  | 143542787 | 143613272 | BAI1      | NM_001702    | chr8  | + | 143543375 | 143545375 | 2001 | 7.23505     |
| chr1  | 36024866  | 36054992  | TFAP2E    | NM_178548    | chr1  | + | 36036969  | 36038969  | 2001 | 7.234635    |
| chr2  | 113816005 | 113843599 | IL1F10    | NM_173161    | chr2  | + | 113823545 | 113825545 | 2001 | 7.2233475   |
| chr15 | 40627378  | 40652635  | PHGR1     | NM_001145643 | chr15 | + | 40641232  | 40643232  | 2001 | 7.223315    |

|       |           |           |          |              |       |   |           |           |      |           |
|-------|-----------|-----------|----------|--------------|-------|---|-----------|-----------|------|-----------|
| chr13 | 111965833 | 112000137 | C13orf16 | NM_152324    | chr13 | + | 111971013 | 111973013 | 2001 | 7.221535  |
| chr9  | 74755547  | 74781052  | GDA      | NM_004293    | chr9  | + | 74762291  | 74764291  | 2001 | 7.19519   |
| chr17 | 77433863  | 77536248  | RBFOX3   | NM_001082575 | chr17 | - | 77478564  | 77480564  | 2001 | 7.19464   |
| chr17 | 6674411   | 6700763   | FBXO39   | NM_153230    | chr17 | + | 6677550   | 6679550   | 2001 | 7.19089   |
| chr18 | 13612800  | 13654373  | C18orf1  | NM_181483    | chr18 | + | 13618865  | 13620865  | 2001 | 7.157455  |
| chr16 | 1552999   | 1604870   | TMEM204  | NM_024600    | chr16 | + | 1582229   | 1584229   | 2001 | 7.155285  |
| chr9  | 138378175 | 138433705 | LCN1     | NM_002297    | chr9  | + | 138411284 | 138413284 | 2001 | 7.14515   |
| chr14 | 94229277  | 94264171  | PRIMA1   | NM_178013    | chr14 | - | 94254767  | 94256767  | 2001 | 7.142495  |
| chr2  | 219714421 | 219728283 | WNT6     | NM_006522    | chr2  | + | 219722544 | 219724544 | 2001 | 7.139395  |
| chr1  | 19140881  | 19195259  | TAS1R2   | NM_152232    | chr1  | - | 19186156  | 19188156  | 2001 | 7.138445  |
| chr19 | 17959789  | 17983888  | SLC5A5   | NM_000453    | chr19 | + | 17980780  | 17982780  | 2001 | 7.137925  |
| chr22 | 42756525  | 42868916  | NFAM1    | NM_145912    | chr22 | - | 42828402  | 42830402  | 2001 | 7.133095  |
| chr17 | 72442902  | 72479408  | CD300A   | NM_007261    | chr17 | + | 72460520  | 72462520  | 2001 | 7.127875  |
| chr1  | 41247364  | 41264891  | KCNQ4    | NM_172163    | chr1  | + | 41247682  | 41249682  | 2001 | 7.107705  |
| chr4  | 8579768   | 8620296   | CPZ      | NM_003652    | chr4  | + | 8592385   | 8594385   | 2001 | 7.10132   |
| chr17 | 72536469  | 72596081  | CD300C   | NM_006678    | chr17 | - | 72542283  | 72544283  | 2001 | 7.10067   |
| chr5  | 170733457 | 170745506 | TLX3     | NM_021025    | chr5  | + | 170734286 | 170736286 | 2001 | 7.09091   |
| chr1  | 2917681   | 2979477   | ACTRT2   | NM_080431    | chr1  | + | 2936044   | 2938044   | 2001 | 7.088535  |
| chr11 | 1624380   | 1630230   | KRTAP5-3 | NM_001012708 | chr11 | - | 1629694   | 1631694   | 537  | 7.078915  |
| chr3  | 9742304   | 9744862   | CPNE9    | NM_153635    | chr3  | + | 9743508   | 9745508   | 1355 | 7.07577   |
| chr12 | 57966563  | 58022490  | ARHGEF25 | NM_182947    | chr12 | + | 58003216  | 58005216  | 2001 | 7.0660475 |
| chr16 | 55511858  | 55541111  | MMP2     | NM_004530    | chr16 | + | 55511079  | 55513079  | 1222 | 7.064095  |
| chr8  | 142374958 | 142406532 | GPR20    | NM_005293    | chr8  | - | 142377366 | 142379366 | 2001 | 7.0599    |
| chrX  | 150839041 | 150919516 | FATE1    | NM_033085    | chrX  | + | 150882506 | 150884506 | 2001 | 7.04707   |

|       |           |           |           |              |       |   |           |           |      |             |
|-------|-----------|-----------|-----------|--------------|-------|---|-----------|-----------|------|-------------|
| chr4  | 82345526  | 82395323  | RASGEF1B  | NM_152545    | chr4  | - | 82393062  | 82395062  | 2001 | 7.01997     |
| chr14 | 50548411  | 50566329  | C14orf183 | NM_001014830 | chr14 | - | 50559362  | 50561362  | 2001 | 7.0182      |
| chr17 | 1948059   | 1969449   | HIC1      | NM_006497    | chr17 | + | 1956391   | 1958391   | 2001 | 7.00983     |
| chr17 | 79602642  | 79631371  | PDE6G     | NM_002602    | chr17 | - | 79623608  | 79625608  | 2001 | 7.009575    |
| chr2  | 241064061 | 241105020 | MYEOV2    | NM_138336    | chr2  | - | 241075765 | 241077765 | 2001 | 7.00819     |
| chr2  | 11051229  | 11074206  | KCNF1     | NM_002236    | chr2  | + | 11050061  | 11052061  | 833  | 6.98778     |
| chr1  | 204973514 | 205032376 | CNTN2     | NM_005076    | chr1  | + | 205010338 | 205012338 | 2001 | 6.985095    |
| chr17 | 48635028  | 48672894  | CACNA1G   | NM_198397    | chr17 | + | 48636447  | 48638447  | 2001 | 6.982736    |
| chr7  | 44260200  | 44369316  | CAMK2B    | NM_172084    | chr7  | - | 44365231  | 44367231  | 2001 | 6.981700714 |
| chr9  | 139808714 | 139847309 | C8G       | NM_000606    | chr9  | + | 139837696 | 139839696 | 2001 | 6.978405    |
| chr4  | 39034503  | 39045153  | TMEM156   | NM_024943    | chr4  | - | 39034042  | 39036042  | 1540 | 6.977245    |
| chr1  | 40231729  | 40266485  | OXCT2     | NM_022120    | chr1  | - | 40237021  | 40239021  | 2001 | 6.974025    |
| chrX  | 150839041 | 150919516 | CNGA2     | NM_005140    | chrX  | + | 150901216 | 150903216 | 2001 | 6.973045    |
| chr5  | 178765431 | 178804807 | ADAMTS2   | NM_021599    | chr5  | - | 178772432 | 178774432 | 2001 | 6.968495    |
| chr6  | 160520220 | 160551140 | SLC22A1   | NM_153187    | chr6  | + | 160540861 | 160542861 | 2001 | 6.9618475   |
| chr22 | 29865031  | 29883357  | NEFH      | NM_021076    | chr22 | + | 29874179  | 29876179  | 2001 | 6.959025    |
| chr11 | 130284206 | 130341115 | ADAMTS15  | NM_139055    | chr11 | + | 130316867 | 130318867 | 2001 | 6.93857     |
| chr7  | 45608358  | 45624518  | ADCY1     | NM_021116    | chr7  | + | 45612123  | 45614123  | 2001 | 6.937715    |
| chr17 | 72237720  | 72252689  | TTYH2     | NM_052869    | chr17 | + | 72242503  | 72244503  | 2001 | 6.93343     |
| chrX  | 151910466 | 151933518 | MAGEA2    | NM_175743    | chrX  | - | 151922365 | 151924365 | 2001 | 6.93008     |
| chr20 | 25040795  | 25066437  | VSX1      | NM_199425    | chr20 | - | 25062768  | 25064768  | 2001 | 6.925615    |
| chr1  | 45271266  | 45281304  | BTBD19    | NM_001136537 | chr1  | + | 45272152  | 45274152  | 2001 | 6.92169     |
| chr5  | 177535043 | 177551839 | N4BP3     | NM_015111    | chr5  | + | 177538554 | 177540554 | 2001 | 6.921255    |
| chr1  | 27704330  | 27734860  | GPR3      | NM_005281    | chr1  | + | 27717150  | 27719150  | 2001 | 6.92024     |

|       |           |           |           |              |       |   |           |           |      |           |
|-------|-----------|-----------|-----------|--------------|-------|---|-----------|-----------|------|-----------|
| chr9  | 135033234 | 135077928 | NTNG2     | NM_032536    | chr9  | + | 135035332 | 135037332 | 2001 | 6.91639   |
| chr2  | 113816005 | 113843599 | IL1F5     | NM_173170    | chr2  | + | 113814213 | 113816213 | 209  | 6.91387   |
| chr7  | 150637592 | 150667991 | KCNH2     | NM_172057    | chr7  | - | 150652916 | 150654916 | 2001 | 6.9011625 |
| chr20 | 31577719  | 31603314  | SUN5      | NM_080675    | chr20 | - | 31592240  | 31594240  | 2001 | 6.89093   |
| chr7  | 149461797 | 149478695 | SSPO      | NM_198455    | chr7  | + | 149471129 | 149473129 | 2001 | 6.88909   |
| chr5  | 170843837 | 170879056 | FGF18     | NM_003862    | chr5  | + | 170844665 | 170846665 | 2001 | 6.8846175 |
| chr3  | 46922301  | 46959053  | PTH1R     | NM_001184744 | chr3  | + | 46921737  | 46923737  | 1437 | 6.87911   |
| chr10 | 94818034  | 94836851  | CYP26A1   | NM_057157    | chr10 | + | 94831230  | 94833230  | 2001 | 6.878825  |
| chr20 | 288936    | 329777    | SOX12     | NM_006943    | chr20 | + | 304237    | 306237    | 2001 | 6.871095  |
| chr21 | 42209631  | 42223377  | DSCAM     | NM_001389    | chr21 | - | 42219040  | 42221040  | 2001 | 6.86484   |
| chr17 | 46807258  | 46827126  | HOXB13    | NM_006361    | chr17 | - | 46806112  | 46808112  | 855  | 6.856275  |
| chr9  | 935334    | 983202    | DMRT3     | NM_021240    | chr9  | + | 974962    | 976962    | 2001 | 6.85526   |
| chr5  | 122401850 | 122432687 | PRDM6     | NM_001136239 | chr5  | + | 122422839 | 122424839 | 2001 | 6.848665  |
| chr16 | 71538815  | 71559220  | CHST4     | NM_005769    | chr16 | + | 71558021  | 71560021  | 1200 | 6.84227   |
| chr11 | 62734114  | 62779445  | SLC22A6   | NM_153278    | chr11 | - | 62752470  | 62754470  | 2001 | 6.84003   |
| chr9  | 111594370 | 111627510 | ACTL7A    | NM_006687    | chr9  | + | 111622601 | 111624601 | 2001 | 6.838355  |
| chr11 | 94240710  | 94280396  | LOC643037 | NM_001190462 | chr11 | + | 94243693  | 94245693  | 2001 | 6.837355  |
| chr1  | 152890432 | 152976512 | SPRR4     | NM_173080    | chr1  | + | 152941126 | 152943126 | 2001 | 6.808745  |
| chr7  | 100800257 | 100821693 | VGFB      | NM_003378    | chr7  | - | 100808853 | 100810853 | 2001 | 6.80786   |
| chr1  | 113047787 | 113072255 | WNT2B     | NM_024494    | chr1  | + | 113049368 | 113051368 | 2001 | 6.787965  |
| chr9  | 34556094  | 34601336  | CNTFR     | NM_147164    | chr9  | - | 34589723  | 34591723  | 2001 | 6.787375  |
| chr19 | 51334063  | 51342686  | KLK15     | NM_138564    | chr19 | - | 51334780  | 51336780  | 2001 | 6.775555  |
| chr8  | 6720222   | 6800413   | DEFA4     | NM_001925    | chr8  | - | 6795787   | 6797787   | 2001 | 6.766605  |
| chr12 | 117766426 | 117802236 | NOS1      | NM_000620    | chr12 | - | 117799608 | 117801608 | 2001 | 6.761075  |

|       |           |           |          |              |       |   |           |           |      |           |
|-------|-----------|-----------|----------|--------------|-------|---|-----------|-----------|------|-----------|
| chr15 | 92935355  | 92940409  | ST8SIA2  | NM_006011    | chr15 | + | 92935138  | 92937138  | 1784 | 6.760435  |
| chr12 | 53064807  | 53134762  | KRT1     | NM_006121    | chr12 | - | 53074192  | 53076192  | 2001 | 6.74943   |
| chr17 | 61558897  | 61570530  | ACE      | NM_152830    | chr17 | + | 61560176  | 61562176  | 2001 | 6.7463625 |
| chr7  | 45170696  | 45219843  | RAMP3    | NM_005856    | chr7  | + | 45195365  | 45197365  | 2001 | 6.735335  |
| chr16 | 57559357  | 57575670  | GPR114   | NM_153837    | chr16 | + | 57574599  | 57576599  | 1072 | 6.733135  |
| chr2  | 121087540 | 121159230 | INHBB    | NM_002193    | chr2  | + | 121101717 | 121103717 | 2001 | 6.719455  |
| chr11 | 76825467  | 76895837  | MYO7A    | NM_001127180 | chr11 | + | 76837314  | 76839314  | 2001 | 6.717285  |
| chr17 | 56352731  | 56399245  | MPO      | NM_000250    | chr17 | - | 56358297  | 56360297  | 2001 | 6.71591   |
| chr11 | 2182173   | 2237853   | INS      | NM_001185098 | chr11 | - | 2182440   | 2184440   | 2001 | 6.712295  |
| chr2  | 29287871  | 29299606  | C2orf71  | NM_001029883 | chr2  | - | 29297128  | 29299128  | 2001 | 6.682395  |
| chr11 | 20568430  | 20632666  | SLC6A5   | NM_004211    | chr11 | + | 20618944  | 20620944  | 2001 | 6.680825  |
| chr12 | 54976973  | 54995873  | PPP1R1A  | NM_006741    | chr12 | - | 54982444  | 54984444  | 2001 | 6.666455  |
| chr10 | 50316869  | 50328148  | C10orf72 | NM_144984    | chr10 | - | 50323560  | 50325560  | 2001 | 6.659495  |
| chr16 | 841891    | 870973    | PRR25    | NM_001013638 | chr16 | + | 853441    | 855441    | 2001 | 6.648475  |
| chr18 | 72096500  | 72141520  | FAM69C   | NM_001044369 | chr18 | - | 72124504  | 72126504  | 2001 | 6.63892   |
| chr20 | 31577719  | 31603314  | BPIL1    | NM_025227    | chr20 | + | 31593405  | 31595405  | 2001 | 6.63491   |
| chr10 | 48418234  | 48461753  | GDF10    | NM_004962    | chr10 | - | 48439167  | 48441167  | 2001 | 6.633175  |
| chr1  | 16539138  | 16574847  | C1orf89  | NM_030907    | chr1  | - | 16563660  | 16565660  | 2001 | 6.632455  |
| chrX  | 147581283 | 147594034 | AFF2     | NM_002025    | chrX  | + | 147580137 | 147582137 | 855  | 6.632295  |
| chr22 | 19086492  | 19139196  | TSSK2    | NM_053006    | chr22 | + | 19116319  | 19118319  | 2001 | 6.63054   |
| chr9  | 34625578  | 34628324  | ARID3C   | NM_001017363 | chr9  | - | 34628012  | 34630012  | 313  | 6.61615   |
| chr12 | 108981887 | 109004693 | TMEM119  | NM_181724    | chr12 | - | 108991895 | 108993895 | 2001 | 6.61524   |
| chr9  | 126114646 | 126169830 | CRB2     | NM_173689    | chr9  | + | 126116446 | 126118446 | 2001 | 6.6129    |
| chr19 | 47973805  | 48015833  | SLC8A2   | NM_015063    | chr19 | - | 47975308  | 47977308  | 2001 | 6.611605  |

|       |           |           |          |              |       |   |           |           |      |           |
|-------|-----------|-----------|----------|--------------|-------|---|-----------|-----------|------|-----------|
| chr11 | 69587078  | 69597198  | FGF4     | NM_002007    | chr11 | - | 69590172  | 69592172  | 2001 | 6.6015    |
| chrX  | 150839041 | 150919516 | PRRG3    | NM_024082    | chrX  | + | 150861728 | 150863728 | 2001 | 6.597145  |
| chr12 | 57966563  | 58022490  | SLC26A10 | NM_133489    | chr12 | + | 58011691  | 58013691  | 2001 | 6.59651   |
| chr2  | 73424696  | 73445705  | NOTO     | NM_001134462 | chr2  | + | 73427384  | 73429384  | 2001 | 6.59475   |
| chr4  | 15427131  | 15446824  | C1QTNF7  | NM_031911    | chr4  | + | 15427627  | 15429627  | 2001 | 6.59393   |
| chr12 | 52748164  | 52771054  | KRT85    | NM_002283    | chr12 | - | 52761310  | 52763310  | 2001 | 6.59239   |
| chr10 | 94818034  | 94836851  | CYP26C1  | NM_183374    | chr10 | + | 94819019  | 94821019  | 2001 | 6.58785   |
| chrX  | 102347492 | 102381623 | NXF3     | NM_022052    | chrX  | - | 102348023 | 102350023 | 2001 | 6.585655  |
| chr13 | 53405163  | 53423169  | PCDH8    | NM_032949    | chr13 | - | 53422775  | 53424775  | 395  | 6.5835775 |
| chr22 | 37421494  | 37554170  | IL2RB    | NM_000878    | chr22 | - | 37545963  | 37547963  | 2001 | 6.578395  |
| chr6  | 36195209  | 36214598  | PNPLA1   | NM_173676    | chr6  | + | 36208943  | 36210943  | 2001 | 6.566455  |
| chr6  | 43193281  | 43228402  | TTBK1    | NM_032538    | chr6  | + | 43209220  | 43211220  | 2001 | 6.566275  |
| chr12 | 130818689 | 130842828 | PIWIL1   | NM_004764    | chr12 | + | 130820431 | 130822431 | 2001 | 6.560385  |
| chr2  | 11809553  | 11817635  | NTSR2    | NM_012344    | chr2  | - | 11810330  | 11812330  | 2001 | 6.556015  |
| chr13 | 22237422  | 22308364  | FGF9     | NM_002010    | chr13 | + | 22243213  | 22245213  | 2001 | 6.54429   |
| chr16 | 50708773  | 50785700  | SNX20    | NM_182854    | chr16 | - | 50715265  | 50717265  | 2001 | 6.5353925 |
| chr4  | 8246447   | 8299335   | HTRA3    | NM_053044    | chr4  | + | 8269487   | 8271487   | 2001 | 6.532195  |
| chr14 | 77577508  | 77613122  | ZDHHC22  | NM_174976    | chr14 | - | 77608135  | 77610135  | 2001 | 6.53128   |
| chr3  | 126223107 | 126240196 | UROC1    | NM_144639    | chr3  | - | 126236617 | 126238617 | 2001 | 6.52921   |
| chr6  | 4066789   | 4104646   | C6orf201 | NM_001085401 | chr6  | + | 4077438   | 4079438   | 2001 | 6.52751   |
| chr19 | 58853367  | 58881362  | A1BG     | NM_130786    | chr19 | - | 58864866  | 58866866  | 2001 | 6.52554   |
| chr17 | 33457083  | 33487283  | UNC45B   | NM_173167    | chr17 | + | 33472834  | 33474834  | 2001 | 6.522525  |
| chr14 | 94779011  | 94801454  | SERPINA6 | NM_001756    | chr14 | - | 94789689  | 94791689  | 2001 | 6.519805  |
| chr4  | 26859894  | 26880997  | STIM2    | NM_020860    | chr4  | + | 26860311  | 26862311  | 2001 | 6.51894   |

|       |           |           |          |              |       |   |           |           |      |          |
|-------|-----------|-----------|----------|--------------|-------|---|-----------|-----------|------|----------|
| chr4  | 6180568   | 6207115   | JAKMIP1  | NM_144720    | chr4  | - | 6202319   | 6204319   | 2001 | 6.51652  |
| chr12 | 53064807  | 53134762  | KRT77    | NM_175078    | chr12 | - | 53097248  | 53099248  | 2001 | 6.50531  |
| chr19 | 5825479   | 5874110   | FUT5     | NM_002034    | chr19 | - | 5870552   | 5872552   | 2001 | 6.490325 |
| chr7  | 112727088 | 112740296 | GPR85    | NM_018970    | chr7  | - | 112727834 | 112729834 | 2001 | 6.47838  |
| chr11 | 67400752  | 67442544  | ACY3     | NM_080658    | chr11 | - | 67418131  | 67420131  | 2001 | 6.47826  |
| chr20 | 39973951  | 40028489  | EMILIN3  | NM_052846    | chr20 | - | 39995499  | 39997499  | 2001 | 6.46822  |
| chr1  | 31202658  | 31247860  | LAPTM5   | NM_006762    | chr1  | - | 31230684  | 31232684  | 2001 | 6.450915 |
| chr1  | 156871016 | 156889233 | C1orf92  | NM_144702    | chr1  | + | 156888422 | 156890422 | 812  | 6.44424  |
| chr16 | 1399281   | 1466856   | UNKL     | NM_023076    | chr16 | - | 1429685   | 1431685   | 2001 | 6.4358   |
| chr4  | 48490499  | 48495837  | ZAR1     | NM_175619    | chr4  | + | 48490307  | 48492307  | 1809 | 6.43152  |
| chr4  | 81949135  | 81954263  | BMP3     | NM_001201    | chr4  | + | 81950117  | 81952117  | 2001 | 6.41224  |
| chr22 | 32845049  | 32860681  | BPIL2    | NM_174932    | chr22 | - | 32853374  | 32855374  | 2001 | 6.410055 |
| chr17 | 18850067  | 18867706  | SLC5A10  | NM_152351    | chr17 | + | 18853476  | 18855476  | 2001 | 6.402205 |
| chr2  | 68693500  | 68702463  | APLF     | NM_173545    | chr2  | + | 68692689  | 68694689  | 1190 | 6.401225 |
| chr14 | 23868497  | 23882294  | MYH6     | NM_002471    | chr14 | - | 23877487  | 23879487  | 2001 | 6.396395 |
| chr14 | 95009641  | 95032444  | SERPINA4 | NM_006215    | chr14 | + | 95025781  | 95027781  | 2001 | 6.384715 |
| chr1  | 20447962  | 20493895  | PLA2G2D  | NM_012400    | chr1  | - | 20446009  | 20448009  | 48   | 6.37596  |
| chr15 | 89334310  | 89349207  | ACAN     | NM_013227    | chr15 | + | 89344672  | 89346672  | 2001 | 6.37563  |
| chr13 | 113736009 | 113820307 | F7       | NM_019616    | chr13 | + | 113758103 | 113760103 | 2001 | 6.3665   |
| chr17 | 27331689  | 27348401  | SEZ6     | NM_178860    | chr17 | - | 27333082  | 27335082  | 2001 | 6.352635 |
| chr1  | 1905103   | 1936658   | KIAA1751 | NM_001080484 | chr1  | - | 1935277   | 1937277   | 1382 | 6.3494   |
| chr9  | 38420842  | 38443830  | IGFBPL1  | NM_001007563 | chr9  | - | 38424445  | 38426445  | 2001 | 6.34138  |
| chr17 | 15235762  | 15285312  | TEKT3    | NM_031898    | chr17 | - | 15244959  | 15246959  | 2001 | 6.332575 |
| chr22 | 21343719  | 21387005  | P2RX6    | NM_005446    | chr22 | + | 21367462  | 21369462  | 2001 | 6.32341  |



|       |           |           |           |              |       |   |           |           |      |             |
|-------|-----------|-----------|-----------|--------------|-------|---|-----------|-----------|------|-------------|
| chr2  | 103222863 | 103249122 | SLC9A2    | NM_003048    | chr2  | + | 103234164 | 103236164 | 2001 | 6.317735    |
| chr4  | 48956800  | 48993598  | CWH43     | NM_025087    | chr4  | + | 48986263  | 48988263  | 2001 | 6.313845    |
| chr7  | 44156290  | 44202820  | GCK       | NM_033508    | chr7  | - | 44198888  | 44200888  | 2001 | 6.30452     |
| chr5  | 74530120  | 74539292  | ANKRD31   | NM_001164443 | chr5  | - | 74532704  | 74534704  | 2001 | 6.3040725   |
| chr12 | 7591209   | 7603557   | CD163L1   | NM_174941    | chr12 | - | 7596750   | 7598750   | 2001 | 6.29965     |
| chr11 | 2396519   | 2482161   | TRPM5     | NM_014555    | chr11 | - | 2444276   | 2446276   | 2001 | 6.293555    |
| chr12 | 124770914 | 124802833 | FAM101A   | NM_181709    | chr12 | + | 124771708 | 124773708 | 2001 | 6.29213     |
| chr19 | 58853367  | 58881362  | ZNF497    | NM_198458    | chr19 | - | 58874121  | 58876121  | 2001 | 6.29161     |
| chr5  | 169922900 | 169932778 | KCNIP1    | NM_014592    | chr5  | + | 169929046 | 169931046 | 2001 | 6.286383333 |
| chrX  | 2745594   | 2749110   | GYG2      | NM_003918    | chrX  | + | 2744861   | 2746861   | 1268 | 6.25505     |
| chr16 | 88906597  | 88943319  | PABPN1L   | NM_001080487 | chr16 | - | 88933015  | 88935015  | 2001 | 6.248575    |
| chr22 | 37673645  | 37715981  | CYTH4     | NM_013385    | chr22 | + | 37676493  | 37678493  | 2001 | 6.22593     |
| chr5  | 139166140 | 139206641 | PSD2      | NM_032289    | chr5  | + | 139173404 | 139175404 | 2001 | 6.2026      |
| chr11 | 61275122  | 61289156  | LRRC10B   | NM_001145077 | chr11 | + | 61274270  | 61276270  | 1149 | 6.20179     |
| chr11 | 118763955 | 118774534 | CXCR5     | NM_032966    | chr11 | + | 118762099 | 118764099 | 145  | 6.17618     |
| chr19 | 45796957  | 45827881  | CKM       | NM_001824    | chr19 | - | 45826234  | 45828234  | 1648 | 6.17494     |
| chr2  | 3658830   | 3712839   | ALLC      | NM_018436    | chr2  | + | 3703784   | 3705784   | 2001 | 6.17401     |
| chrX  | 117628795 | 117643929 | DOCK11    | NM_144658    | chrX  | + | 117627870 | 117629870 | 1076 | 6.15372     |
| chr7  | 31036529  | 31094918  | ADCYAP1R1 | NM_001118    | chr7  | + | 31090140  | 31092140  | 2001 | 6.15026     |
| chr2  | 26852103  | 26876530  | CIB4      | NM_001029881 | chr2  | - | 26864212  | 26866212  | 2001 | 6.145865    |
| chr19 | 51476183  | 51644831  | SIGLEC7   | NM_016543    | chr19 | + | 51643556  | 51645556  | 1276 | 6.1213125   |
| chr3  | 52326885  | 52441027  | DNAH1     | NM_015512    | chr3  | + | 52348333  | 52350333  | 2001 | 6.119695    |
| chr12 | 54352252  | 54384109  | HOXC11    | NM_014212    | chr12 | + | 54364908  | 54366908  | 2001 | 6.1176      |
| chr14 | 74694476  | 74742510  | VSX2      | NM_182894    | chr14 | + | 74704173  | 74706173  | 2001 | 6.117115    |

|       |           |           |          |              |       |   |           |           |      |             |
|-------|-----------|-----------|----------|--------------|-------|---|-----------|-----------|------|-------------|
| chr10 | 48418234  | 48461753  | GDF2     | NM_016204    | chr10 | - | 48416854  | 48418854  | 621  | 6.111465    |
| chr15 | 59716937  | 59748783  | FAM81A   | NM_152450    | chr15 | + | 59728370  | 59730370  | 2001 | 6.111015    |
| chr12 | 109725023 | 109748739 | FOXN4    | NM_213596    | chr12 | - | 109747026 | 109749026 | 1714 | 6.109735    |
| chr10 | 88411676  | 88433186  | OPN4     | NM_033282    | chr10 | + | 88412312  | 88414312  | 2001 | 6.10882     |
| chr15 | 88793207  | 88847021  | NTRK3    | NM_002530    | chr15 | - | 88799662  | 88801662  | 2001 | 6.100378333 |
| chr13 | 108846248 | 108872802 | ABHD13   | NM_032859    | chr13 | + | 108868761 | 108870761 | 2001 | 6.09743     |
| chr19 | 46384392  | 46423983  | NANOS2   | NM_001029861 | chr19 | - | 46418037  | 46420037  | 2001 | 6.09378     |
| chr20 | 3665176   | 3693230   | SIGLEC1  | NM_023068    | chr20 | - | 3687776   | 3689776   | 2001 | 6.080875    |
| chr17 | 72536469  | 72596081  | C17orf77 | NM_152460    | chr17 | + | 72579055  | 72581055  | 2001 | 6.07561     |
| chr11 | 130284206 | 130341115 | ADAMTS8  | NM_007037    | chr11 | - | 130298540 | 130300540 | 2001 | 6.071775    |
| chr17 | 4528190   | 4547269   | ALOX15   | NM_001140    | chr17 | - | 4544961   | 4546961   | 2001 | 6.06884     |
| chr4  | 36269553  | 36294386  | DTHD1    | NM_001170700 | chr4  | + | 36283642  | 36285642  | 2001 | 6.05851     |
| chr7  | 155591921 | 155655070 | SHH      | NM_000193    | chr7  | - | 155604968 | 155606968 | 2001 | 6.04352     |
| chr1  | 238047591 | 238075534 | ZP4      | NM_021186    | chr1  | - | 238054223 | 238056223 | 2001 | 6.037375    |
| chr8  | 81988464  | 82039961  | PAG1     | NM_018440    | chr8  | - | 82024304  | 82026304  | 2001 | 6.02148     |
| chr3  | 126070049 | 126093771 | KLF15    | NM_014079    | chr3  | - | 126076237 | 126078237 | 2001 | 6.015965    |
| chr1  | 46989391  | 47023375  | KNCN     | NM_001097611 | chr1  | - | 47016888  | 47018888  | 2001 | 6.011965    |
| chr13 | 28539465  | 28566296  | CDX2     | NM_001265    | chr13 | - | 28543318  | 28545318  | 2001 | 5.99592     |
| chr8  | 6720222   | 6800413   | DEFB1    | NM_005218    | chr8  | - | 6735530   | 6737530   | 2001 | 5.98687     |
| chr1  | 208077186 | 208087557 | CD34     | NM_001773    | chr1  | - | 208084684 | 208086684 | 2001 | 5.981175    |
| chr4  | 174438219 | 174459368 | HAND2    | NM_021973    | chr4  | - | 174451379 | 174453379 | 2001 | 5.96595     |
| chr2  | 233346399 | 233399944 | ECEL1    | NM_004826    | chr2  | - | 233352533 | 233354533 | 2001 | 5.94473     |
| chr4  | 55080097  | 55104857  | PDGFRA   | NM_006206    | chr4  | + | 55093262  | 55095262  | 2001 | 5.944045    |
| chr1  | 152446398 | 152493428 | LCE5A    | NM_178438    | chr1  | + | 152481318 | 152483318 | 2001 | 5.935845    |

|       |           |           |          |              |       |   |           |           |      |          |
|-------|-----------|-----------|----------|--------------|-------|---|-----------|-----------|------|----------|
| chr22 | 45796009  | 45838121  | SMC1B    | NM_148674    | chr22 | - | 45809501  | 45811501  | 2001 | 5.932555 |
| chr17 | 16332173  | 16411584  | C17orf76 | NM_207387    | chr17 | - | 16395481  | 16397481  | 2001 | 5.904725 |
| chr6  | 39003550  | 39015168  | GLP1R    | NM_002062    | chr6  | + | 39014555  | 39016555  | 614  | 5.89024  |
| chrX  | 136631350 | 136657897 | ZIC3     | NM_003413    | chrX  | + | 136646344 | 136648344 | 2001 | 5.87719  |
| chr2  | 68693500  | 68702463  | FBXO48   | NM_001024680 | chr2  | - | 68694391  | 68696391  | 2001 | 5.857935 |
| chr2  | 102005606 | 102027430 | CREG2    | NM_153836    | chr2  | - | 102003966 | 102005966 | 361  | 5.85595  |
| chr22 | 31530354  | 31538977  | PLA2G3   | NM_015715    | chr22 | - | 31536470  | 31538470  | 2001 | 5.84243  |
| chr1  | 40100149  | 40160008  | HEYL     | NM_014571    | chr1  | - | 40105349  | 40107349  | 2001 | 5.83871  |
| chr12 | 52907538  | 52974591  | KRT71    | NM_033448    | chr12 | - | 52946932  | 52948932  | 2001 | 5.817405 |
| chr1  | 1848818   | 1879275   | TMEM52   | NM_178545    | chr1  | - | 1850741   | 1852741   | 2001 | 5.805995 |
| chr22 | 43805352  | 43843581  | MPPED1   | NM_001044370 | chr22 | + | 43806018  | 43808018  | 2001 | 5.803615 |
| chr6  | 39199740  | 39293404  | KCNK17   | NM_031460    | chr6  | - | 39282237  | 39284237  | 2001 | 5.7975   |
| chr3  | 10507870  | 10590953  | ATP2B2   | NM_001683    | chr3  | - | 10547269  | 10549269  | 2001 | 5.793485 |
| chr8  | 41512338  | 41556914  | ANK1     | NM_020480    | chr8  | - | 41522805  | 41524805  | 2001 | 5.782025 |
| chr10 | 88411676  | 88433186  | LDB3     | NM_007078    | chr10 | + | 88426424  | 88428424  | 2001 | 5.773125 |
| chr11 | 93744743  | 93793826  | HEPHL1   | NM_001098672 | chr11 | + | 93752376  | 93754376  | 2001 | 5.771325 |
| chrX  | 150341728 | 150348838 | GPR50    | NM_004224    | chrX  | + | 150343054 | 150345054 | 2001 | 5.765145 |
| chr8  | 1415501   | 1462295   | DLGAP2   | NM_004745    | chr8  | + | 1447567   | 1449567   | 2001 | 5.76495  |
| chr6  | 160758253 | 160799579 | SLC22A3  | NM_021977    | chr6  | + | 160767423 | 160769423 | 2001 | 5.75182  |
| chr4  | 96469896  | 96506715  | UNC5C    | NM_003728    | chr4  | - | 96470362  | 96472362  | 2001 | 5.73257  |
| chr10 | 44876742  | 44891010  | CXCL12   | NM_199168    | chr10 | - | 44880546  | 44882546  | 2001 | 5.70763  |
| chr17 | 40017935  | 40026143  | KLHL11   | NM_018143    | chr17 | - | 40021630  | 40023630  | 2001 | 5.704905 |
| chr9  | 87279361  | 87292326  | NTRK2    | NM_006180    | chr9  | + | 87281464  | 87283464  | 2001 | 5.697045 |
| chr7  | 28994383  | 28999961  | TRIL     | NM_014817    | chr7  | - | 28998030  | 29000030  | 1932 | 5.685335 |

|       |           |           |          |              |       |   |           |           |      |             |
|-------|-----------|-----------|----------|--------------|-------|---|-----------|-----------|------|-------------|
| chr1  | 22962874  | 23008392  | C1QA     | NM_015991    | chr1  | + | 22961116  | 22963116  | 243  | 5.680225    |
| chr6  | 50785106  | 50790263  | TFAP2B   | NM_003221    | chr6  | + | 50784437  | 50786437  | 1332 | 5.67887     |
| chr2  | 223161745 | 223176909 | PAX3     | NM_181461    | chr2  | - | 223163716 | 223165716 | 2001 | 5.667712    |
| chr13 | 114263532 | 114324165 | ATP4B    | NM_000705    | chr13 | - | 114312514 | 114314514 | 2001 | 5.665945    |
| chr11 | 111371287 | 111409893 | BTG4     | NM_017589    | chr11 | - | 111383065 | 111385065 | 2001 | 5.665735    |
| chr17 | 5956462   | 5984291   | WSCD1    | NM_015253    | chr17 | + | 5971932   | 5973932   | 2001 | 5.652945    |
| chr2  | 223907554 | 223924375 | KCNE4    | NM_080671    | chr2  | + | 223914860 | 223916860 | 2001 | 5.63657     |
| chr2  | 80530153  | 80538747  | LRRTM1   | NM_178839    | chr2  | - | 80531488  | 80533488  | 2001 | 5.63573     |
| chr10 | 102500186 | 102511516 | PAX2     | NM_003990    | chr10 | + | 102503466 | 102505466 | 2001 | 5.63484     |
| chr10 | 134757917 | 134806685 | C10orf93 | NM_173572    | chr10 | - | 134756090 | 134758090 | 174  | 5.624185    |
| chr17 | 2929535   | 2968750   | OR1D5    | NM_014566    | chr17 | - | 2966902   | 2968902   | 1849 | 5.616735    |
| chr6  | 4066789   | 4104646   | C6orf146 | NM_173563    | chr6  | - | 4079392   | 4081392   | 2001 | 5.61095     |
| chr12 | 121080694 | 121097181 | CABP1    | NM_031205    | chr12 | + | 121086369 | 121088369 | 2001 | 5.585696667 |
| chr11 | 64383640  | 64415926  | NRXN2    | NM_138734    | chr11 | - | 64410788  | 64412788  | 2001 | 5.52052     |
| chr1  | 40100149  | 40160008  | HPCAL4   | NM_016257    | chr1  | - | 40157090  | 40159090  | 2001 | 5.50512     |
| chr13 | 113274011 | 113307105 | C13orf35 | NM_207440    | chr13 | + | 113299356 | 113301356 | 2001 | 5.50397     |
| chr5  | 75377712  | 75381525  | SV2C     | NM_014979    | chr5  | + | 75377303  | 75379303  | 1592 | 5.49167     |
| chr4  | 4856593   | 4874746   | MSX1     | NM_002448    | chr4  | + | 4859390   | 4861390   | 2001 | 5.46924     |
| chr8  | 6720222   | 6800413   | DEFA6    | NM_001926    | chr8  | - | 6783599   | 6785599   | 2001 | 5.468255    |
| chr1  | 157060676 | 157115194 | ETV3L    | NM_001004341 | chr1  | - | 157069601 | 157071601 | 2001 | 5.46757     |
| chr1  | 47656816  | 47703553  | TAL1     | NM_003189    | chr1  | - | 47695444  | 47697444  | 2001 | 5.466995    |
| chr5  | 131394814 | 131425363 | IL3      | NM_000588    | chr5  | + | 131394345 | 131396345 | 1532 | 5.4478      |
| chr15 | 78617973  | 78637706  | CRABP1   | NM_004378    | chr15 | + | 78630664  | 78632664  | 2001 | 5.44005     |
| chr10 | 91292353  | 91309554  | SLC16A12 | NM_213606    | chr10 | - | 91295314  | 91297314  | 2001 | 5.43882     |

|       |           |           |           |              |       |   |           |           |      |          |
|-------|-----------|-----------|-----------|--------------|-------|---|-----------|-----------|------|----------|
| chr2  | 108425136 | 108450294 | RGPD4     | NM_182588    | chr2  | + | 108441386 | 108443386 | 2001 | 5.435795 |
| chr22 | 19086492  | 19139196  | GSC2      | NM_005315    | chr22 | - | 19137797  | 19139797  | 1400 | 5.421855 |
| chr22 | 45310559  | 45410969  | PHF21B    | NM_138415    | chr22 | - | 45405582  | 45407582  | 2001 | 5.415915 |
| chr8  | 25897353  | 25908446  | EBF2      | NM_022659    | chr8  | - | 25902393  | 25904393  | 2001 | 5.41012  |
| chr2  | 106669618 | 106681819 | C2orf40   | NM_032411    | chr2  | + | 106680111 | 106682111 | 1709 | 5.403615 |
| chr17 | 39238880  | 39276311  | KRTAP4-11 | NM_033059    | chr17 | - | 39274607  | 39276607  | 1705 | 5.39603  |
| chr11 | 134225440 | 134287387 | B3GAT1    | NM_054025    | chr11 | - | 134281813 | 134283813 | 2001 | 5.391445 |
| chr11 | 18802036  | 18826408  | PTPN5     | NM_032781    | chr11 | - | 18813390  | 18815390  | 2001 | 5.383125 |
| chr4  | 83806760  | 83820089  | THAP9     | NM_024672    | chr4  | + | 83819835  | 83821835  | 255  | 5.35611  |
| chr7  | 98453862  | 98479514  | TMEM130   | NM_152913    | chr7  | - | 98467674  | 98469674  | 2001 | 5.348575 |
| chr1  | 157801879 | 157832610 | CD5L      | NM_005894    | chr1  | - | 157811635 | 157813635 | 2001 | 5.312705 |
| chr12 | 10573074  | 10606119  | KLRC2     | NM_002260    | chr12 | - | 10588593  | 10590593  | 2001 | 5.310925 |
| chr22 | 37581743  | 37623287  | SSTR3     | NM_001051    | chr22 | - | 37608354  | 37610354  | 2001 | 5.2883   |
| chr3  | 129220001 | 129304339 | RHO       | NM_000539    | chr3  | + | 129245480 | 129247480 | 2001 | 5.267165 |
| chr12 | 10573074  | 10606119  | KLRC3     | NM_007333    | chr12 | - | 10573195  | 10575195  | 2001 | 5.26202  |
| chr8  | 86348011  | 86365516  | CA3       | NM_005181    | chr8  | + | 86349054  | 86351054  | 2001 | 5.254765 |
| chr1  | 152766774 | 152797737 | LCE1B     | NM_178349    | chr1  | + | 152782445 | 152784445 | 2001 | 5.246285 |
| chr17 | 39457481  | 39481820  | KRTAP17-1 | NM_031964    | chr17 | - | 39471948  | 39473948  | 2001 | 5.22867  |
| chr18 | 13868627  | 13916366  | MC2R      | NM_000529    | chr18 | - | 13915536  | 13917536  | 831  | 5.203155 |
| chr8  | 101641821 | 101691337 | SNX31     | NM_152628    | chr8  | - | 101661894 | 101663894 | 2001 | 5.19872  |
| chr20 | 23062114  | 23081593  | CD93      | NM_012072    | chr20 | - | 23066978  | 23068978  | 2001 | 5.197935 |
| chr2  | 228243296 | 228262568 | TM4SF20   | NM_024795    | chr2  | - | 228244023 | 228246023 | 2001 | 5.18563  |
| chr1  | 13829581  | 13867729  | LRRC38    | NM_001010847 | chr1  | - | 13840243  | 13842243  | 2001 | 5.183045 |
| chr17 | 50206214  | 50238432  | CA10      | NM_020178    | chr17 | - | 50236133  | 50238133  | 2001 | 5.167585 |

|       |           |           |           |              |       |   |           |           |      |          |
|-------|-----------|-----------|-----------|--------------|-------|---|-----------|-----------|------|----------|
| chr12 | 106958918 | 107001268 | RFX4      | NM_213594    | chr12 | + | 106975031 | 106977031 | 2001 | 5.14333  |
| chr10 | 72544248  | 72590304  | C10orf27  | NM_152710    | chr10 | - | 72545158  | 72547158  | 2001 | 5.132575 |
| chrX  | 148760982 | 148798501 | MAGEA11   | NM_005366    | chrX  | + | 148791736 | 148793736 | 2001 | 5.130985 |
| chr10 | 50869360  | 50896424  | C10orf53  | NM_182554    | chr10 | + | 50885682  | 50887682  | 2001 | 5.105245 |
| chr5  | 178394603 | 178423704 | GRM6      | NM_000843    | chr5  | - | 178422125 | 178424125 | 1580 | 5.07826  |
| chr22 | 48881976  | 48983192  | FAM19A5   | NM_015381    | chr22 | + | 48970116  | 48972116  | 2001 | 5.058295 |
| chr6  | 29415534  | 29433356  | OR2H1     | NM_030883    | chr6  | + | 29424228  | 29426228  | 2001 | 5.0322   |
| chr4  | 186453438 | 186473737 | PDLIM3    | NM_014476    | chr4  | - | 186456713 | 186458713 | 2001 | 5.015455 |
| chr17 | 41834718  | 41836665  | SOST      | NM_025237    | chr17 | - | 41836157  | 41838157  | 509  | 4.906105 |
| chr14 | 57263234  | 57275732  | OTX2      | NM_172337    | chr14 | - | 57272346  | 57274346  | 2001 | 4.875925 |
| chr3  | 194091699 | 194107132 | LRRC15    | NM_130830    | chr3  | - | 194090473 | 194092473 | 775  | 4.795475 |
| chrX  | 113814461 | 113819142 | HTR2C     | NM_000868    | chrX  | + | 113816549 | 113818549 | 2001 | 4.77444  |
| chrX  | 141288180 | 141302158 | MAGEC2    | NM_016249    | chrX  | - | 141293077 | 141295077 | 2001 | 4.67852  |
| chr15 | 32979820  | 33012117  | GREM1     | NM_013372    | chr15 | + | 33008203  | 33010203  | 2001 | 4.615305 |
| chr8  | 65490721  | 65499284  | BHLHE22   | NM_152414    | chr8  | + | 65490812  | 65492812  | 2001 | 4.547665 |
| chr2  | 241927711 | 241943588 | SNED1     | NM_001080437 | chr2  | + | 241936253 | 241938253 | 2001 | 4.540935 |
| chr2  | 223161745 | 223176909 | CCDC140   | NM_153038    | chr2  | + | 223160864 | 223162864 | 1120 | 4.523425 |
| chr15 | 65691334  | 65718771  | IGDCC4    | NM_020962    | chr15 | - | 65715411  | 65717411  | 2001 | 4.353905 |
| chr1  | 13740143  | 13777051  | PRAMEF21  | NM_001100114 | chr1  | + | 13740800  | 13742800  | 2001 |          |
| chr1  | 21026101  | 21062620  | SH2D5     | NM_001103161 | chr1  | - | 21059134  | 21061134  | 2001 |          |
| chr1  | 151690417 | 151712803 | C1orf230  | NM_001144956 | chr1  | + | 151692011 | 151694011 | 2001 |          |
| chr1  | 152690732 | 152743156 | C1orf68   | NM_001024679 | chr1  | + | 152689996 | 152691996 | 1265 |          |
| chr1  | 209589280 | 209604570 | LOC642587 | NM_001104548 | chr1  | + | 209600166 | 209602166 | 2001 |          |
| chr2  | 191400421 | 191437272 | TMEM194B  | NM_001142645 | chr2  | - | 191399469 | 191401469 | 1049 |          |

|       |           |           |           |              |       |   |           |           |      |  |
|-------|-----------|-----------|-----------|--------------|-------|---|-----------|-----------|------|--|
| chr2  | 242662946 | 242703825 | D2HGDH    | NM_152783    | chr2  | + | 242672028 | 242674028 | 2001 |  |
| chr4  | 7029327   | 7049691   | TADA2B    | NM_152293    | chr4  | + | 7043154   | 7045154   | 2001 |  |
| chr4  | 7367751   | 7492963   | PSAPL1    | NM_001085382 | chr4  | - | 7436701   | 7438701   | 2001 |  |
| chr7  | 128468762 | 128561570 | KCP       | NM_199349    | chr7  | - | 128550774 | 128552774 | 2001 |  |
| chr7  | 141397049 | 141406598 | KIAA1147  | NM_001080392 | chr7  | - | 141401954 | 141403954 | 2001 |  |
| chr7  | 141397049 | 141406598 | WEE2      | NM_001105558 | chr7  | + | 141406151 | 141408151 | 448  |  |
| chr7  | 144096246 | 144113851 | NOBOX     | NM_001080413 | chr7  | - | 144100787 | 144102787 | 2001 |  |
| chr8  | 142231113 | 142248073 | SLC45A4   | NM_001080431 | chr8  | - | 142238674 | 142240674 | 2001 |  |
| chr9  | 34715639  | 34741924  | C9orf144B | NM_001141917 | chr9  | - | 34729536  | 34731536  | 2001 |  |
| chr11 | 1218575   | 1242443   | MUC5B     | NM_002458    | chr11 | + | 1242293   | 1244293   | 151  |  |
| chr11 | 1650819   | 1712142   | KRTAP5-5  | NM_001001480 | chr11 | + | 1649031   | 1651031   | 213  |  |
| chr11 | 2182173   | 2237853   | INS-IGF2  | NM_001042376 | chr11 | - | 2182440   | 2184440   | 2001 |  |
| chr11 | 2277729   | 2350869   | C11orf21  | NM_001142946 | chr11 | - | 2323144   | 2325144   | 2001 |  |
| chr12 | 10025223  | 10050371  | KLRF2     | NM_001190765 | chr12 | + | 10032086  | 10034086  | 2001 |  |
| chr12 | 27229324  | 27249590  | C12orf71  | NM_001080406 | chr12 | - | 27235456  | 27237456  | 2001 |  |
| chr13 | 28539465  | 28566296  | PRHOXNB   | NM_001105577 | chr13 | - | 28562775  | 28564775  | 2001 |  |
| chr14 | 36976566  | 36986367  | SFTA3     | NM_001101341 | chr14 | - | 36982991  | 36984991  | 2001 |  |
| chr14 | 93640204  | 93659637  | C14orf109 | NM_015676    | chr14 | + | 93649294  | 93651294  | 2001 |  |
| chr14 | 94914389  | 94941468  | SERPINA11 | NM_001080451 | chr14 | - | 94919123  | 94921123  | 2001 |  |
| chr15 | 42094340  | 42157010  | JMJD7     | NM_001114632 | chr15 | + | 42118281  | 42120281  | 2001 |  |
| chr15 | 42094340  | 42157010  | PLA2G4B   | NM_001114633 | chr15 | + | 42129009  | 42131009  | 2001 |  |
| chr16 | 66972097  | 66997078  | CES3      | NM_024922    | chr16 | + | 66993130  | 66995130  | 2001 |  |
| chr17 | 6545800   | 6585564   | C17orf100 | NM_001105520 | chr17 | + | 6553057   | 6555057   | 2001 |  |

|       |           |           |              |              |       |   |           |           |      |  |
|-------|-----------|-----------|--------------|--------------|-------|---|-----------|-----------|------|--|
| chr17 | 20349098  | 20379052  | LGALS9B      | NM_001042685 | chr17 | - | 20370849  | 20372849  | 2001 |  |
| chr17 | 39238880  | 39276311  | KRTAP4-7     | NM_033061    | chr17 | + | 39238457  | 39240457  | 1578 |  |
| chr17 | 39238880  | 39276311  | KRTAP4-8     | NM_031960    | chr17 | - | 39254376  | 39256376  | 2001 |  |
| chr17 | 39238880  | 39276311  | KRTAP4-9     | NM_001146041 | chr17 | + | 39259639  | 39261639  | 2001 |  |
| chr17 | 72536469  | 72596081  | CD300LD      | NM_001115152 | chr17 | - | 72588371  | 72590371  | 2001 |  |
| chr19 | 7675216   | 7711628   | LOC100131801 | NM_001171155 | chr19 | + | 7692669   | 7694669   | 2001 |  |
| chr19 | 53544918  | 53561272  | HERV-V2      | NM_001191055 | chr19 | + | 53545989  | 53547989  | 2001 |  |
| chr22 | 24296477  | 24320634  | GSTT2B       | NM_001080843 | chr22 | - | 24303369  | 24305369  | 2001 |  |
| chr22 | 24296477  | 24320634  | DDTL         | NM_001084393 | chr22 | + | 24307024  | 24309024  | 2001 |  |
| chr22 | 30939215  | 30980664  | LOC730005    | NM_001193336 | chr22 | - | 30942670  | 30944670  | 2001 |  |
| chrX  | 70980284  | 70993016  | CXorf49B     | NM_001145139 | chrX  | + | 70981138  | 70983138  | 2001 |  |
| chrX  | 151910466 | 151933518 | CSAG2        | NM_004909    | chrX  | + | 151925732 | 151927732 | 2001 |  |
